# Supplementary material for: Regioselective azidotrimethylsilylation of carbohydrates and applications thereof
Source: Royal Society of Chemistry journal article supplement (doi:10.1039/c2ob26324f), 2012-01-01

### Supporting information

#### Regioselective azidotrimethylsilylation of carbohydrates and applications thereof

Mallikharjuna Rao L,<sup>a</sup> Syed Khalid Yousuf,<sup>a</sup> Debaraj Mukherjee<sup>a</sup>, Subhash Chandra Taneja<sup>a\*</sup>

CSIR-Natural Product Chemistry (M), Indian Institute of Integrative Medicine, Canal Road,  
Jammu, India-180001.

[sctaneja@iiim.ac.in](mailto:sctaneja@iiim.ac.in).

Copies of <sup>1</sup>H NMR and <sup>13</sup>C NMR-----2-27.

## Copies of $^1\text{H}$ NMR and $^{13}\text{C}$ NMR:

$^1\text{H}$  NMR of compound 1a

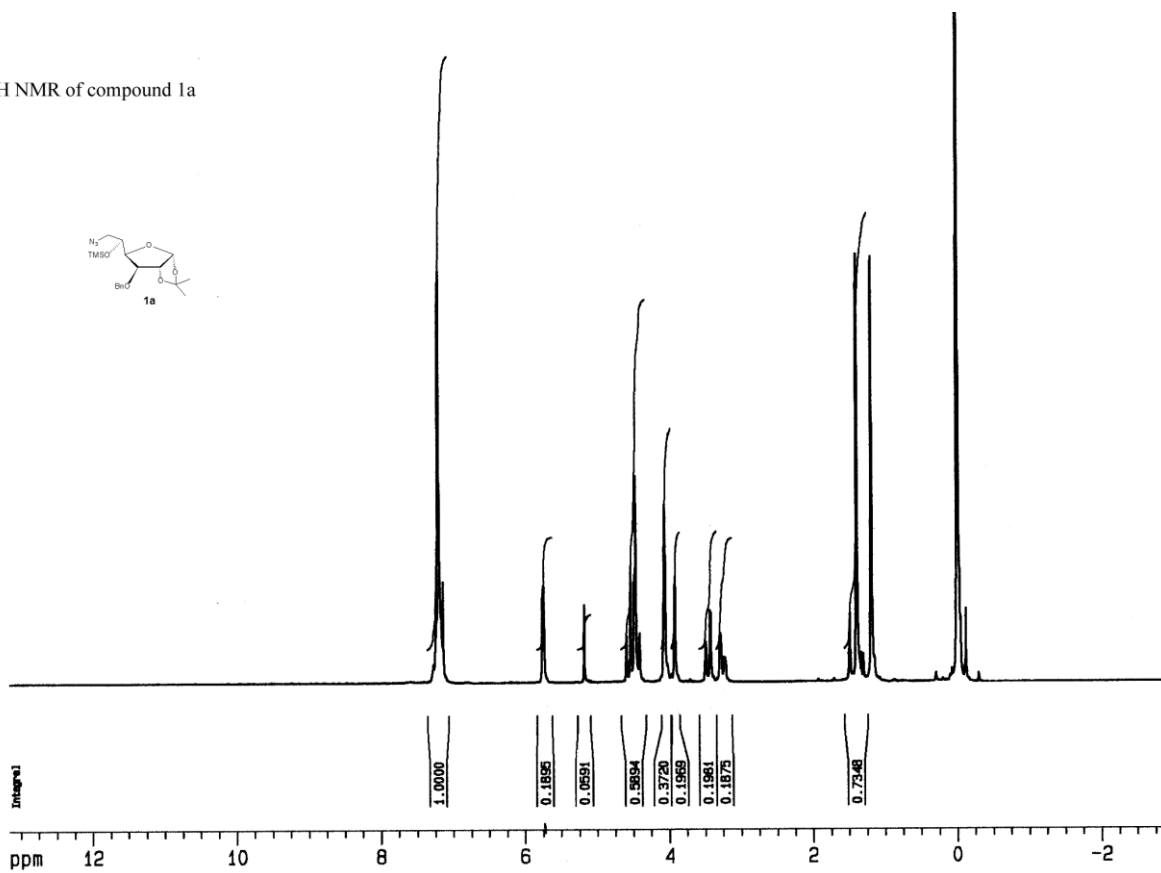

$^{13}\text{C}$  NMR of compound 1a

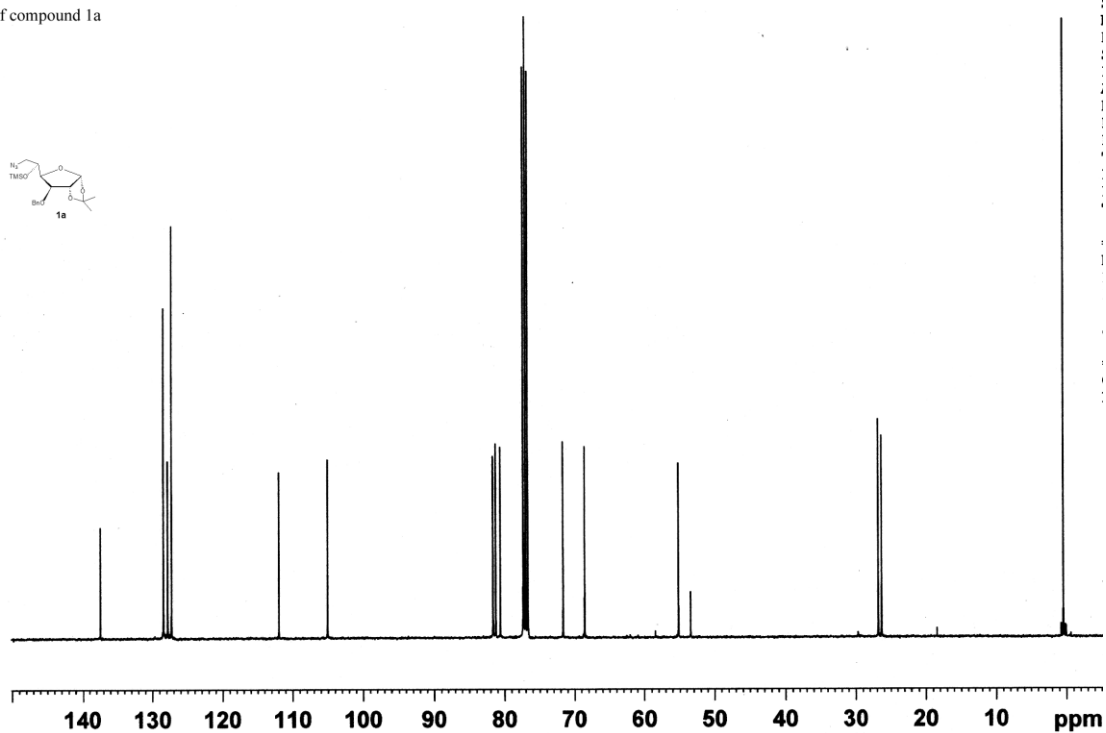

### <sup>1</sup>H NMR of compound 2a

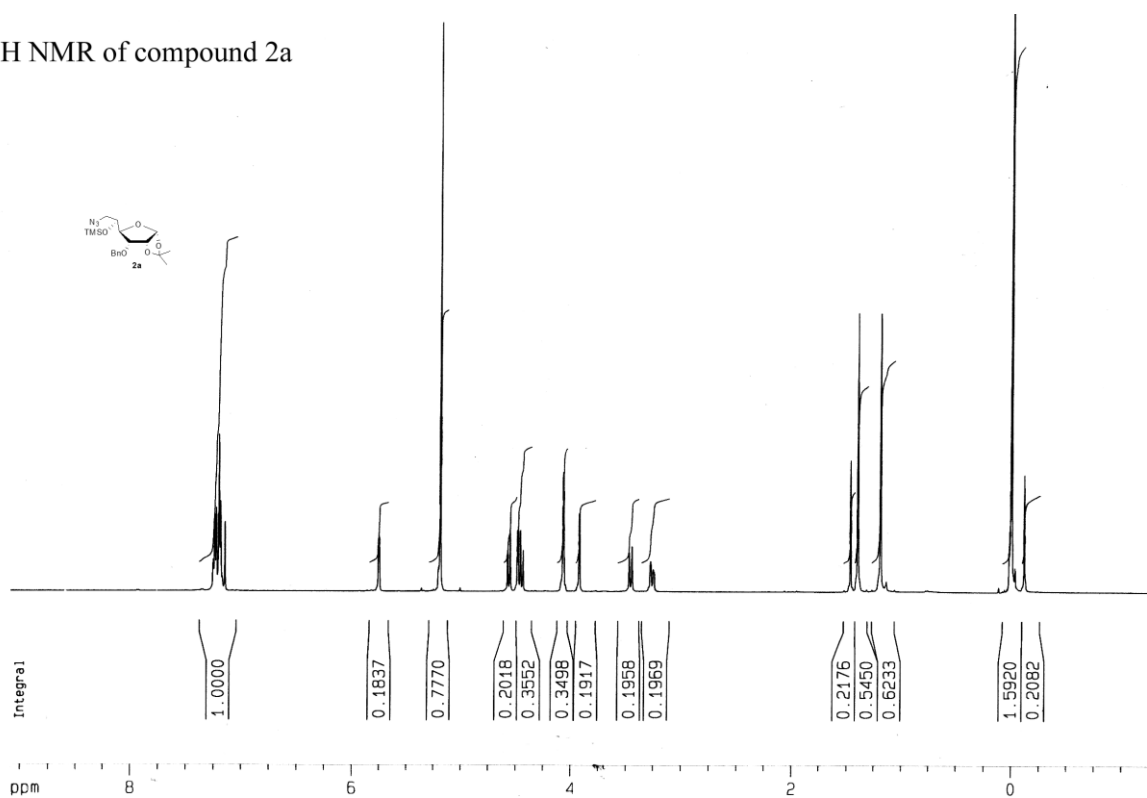

### <sup>13</sup>C NMR of compound 2a

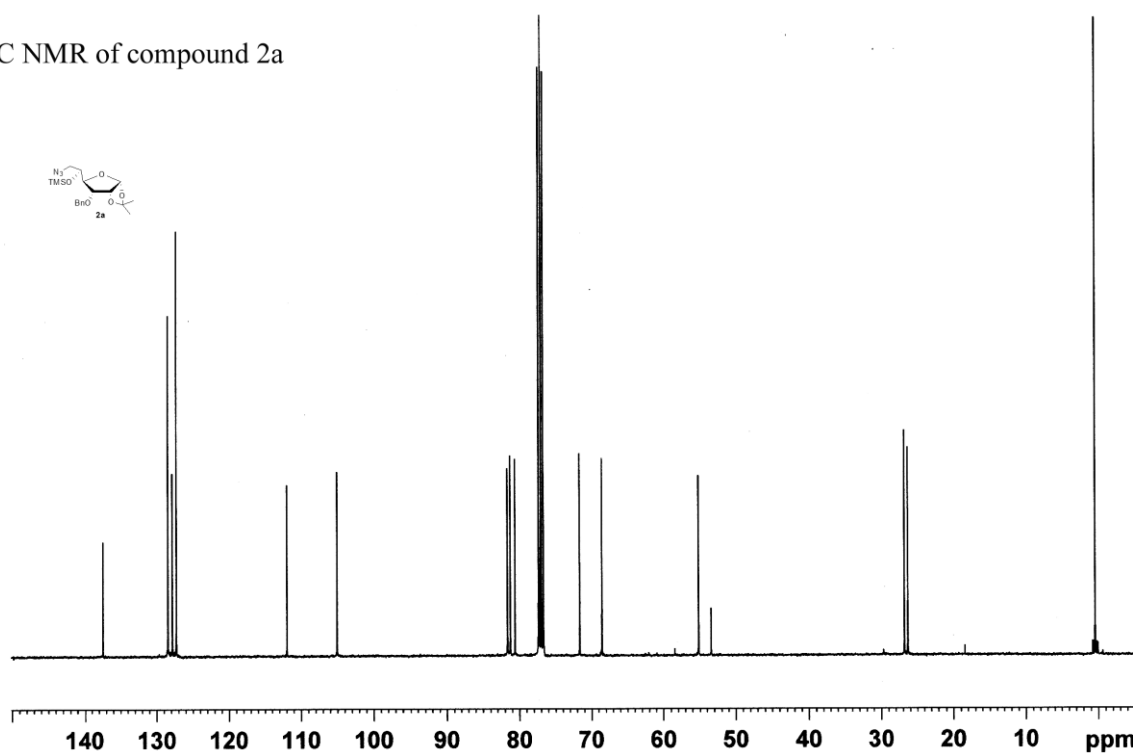

### <sup>1</sup>H NMR of compound 3a

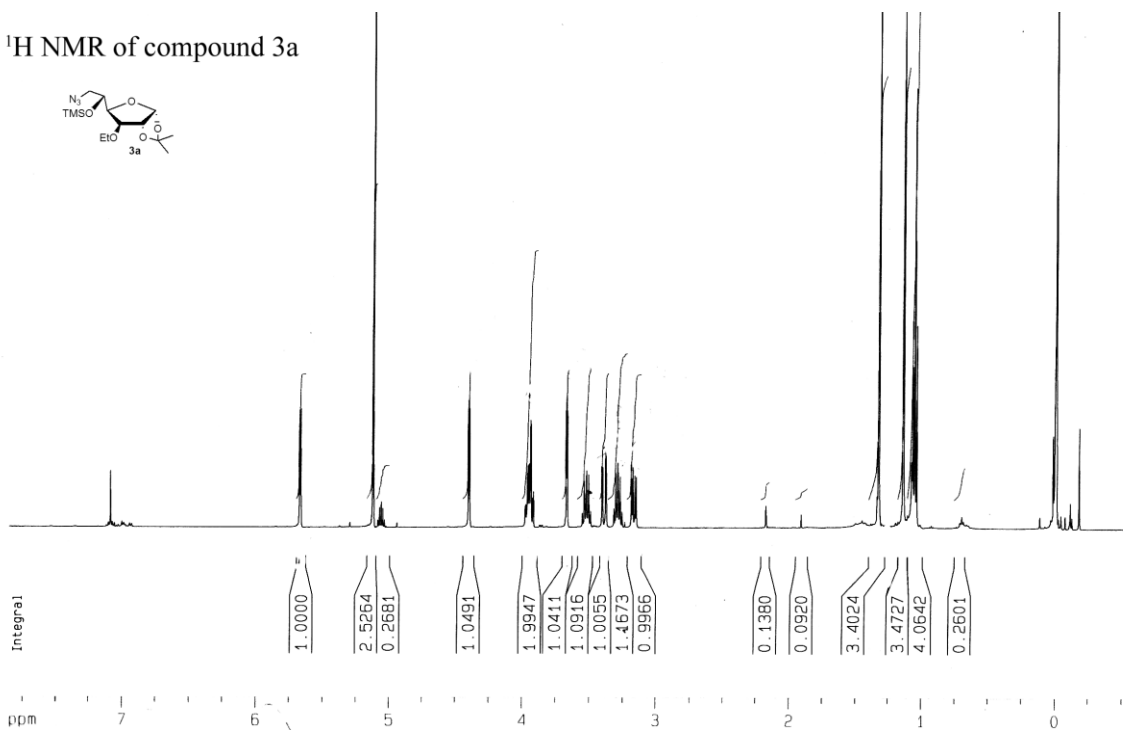

### <sup>13</sup>C NMR of compound 3a

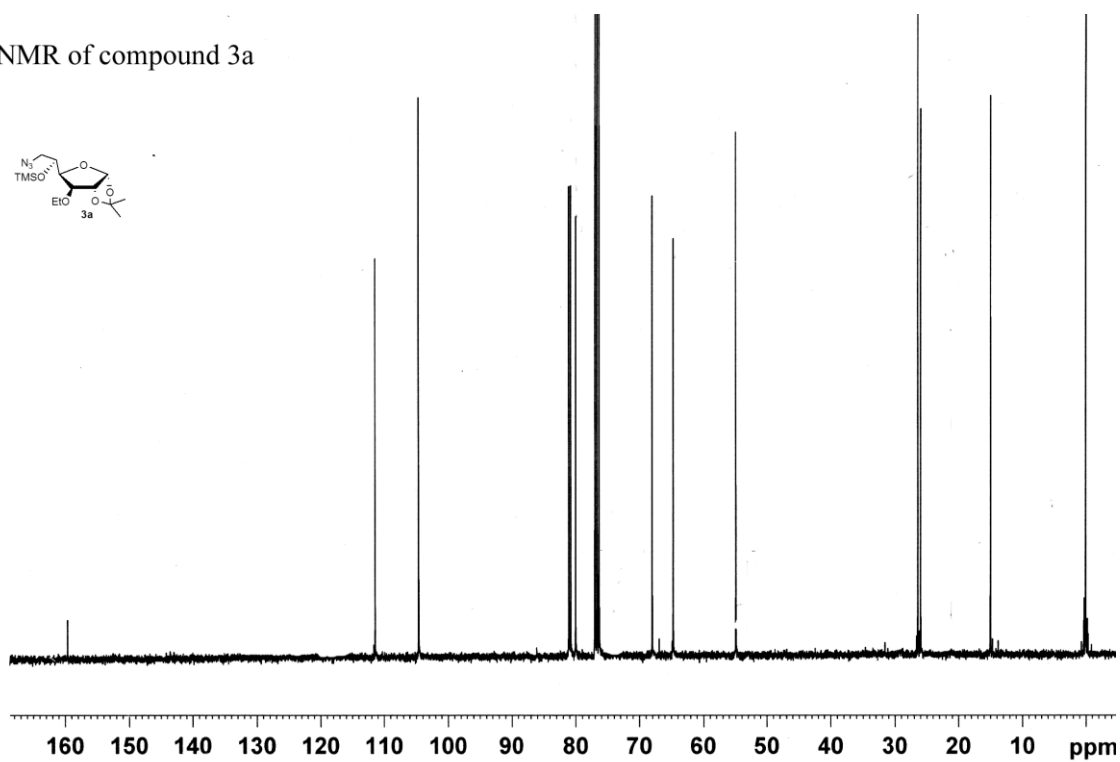

### $^1\text{H}$ NMR of compound 4a

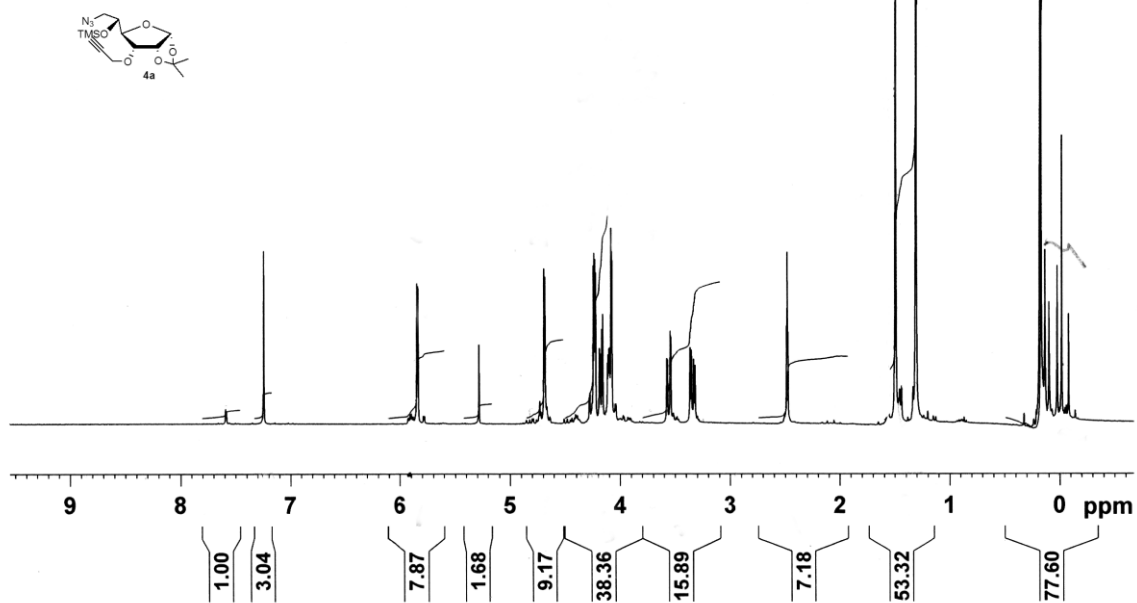

### $^{13}\text{C}$ NMR of compound 4a

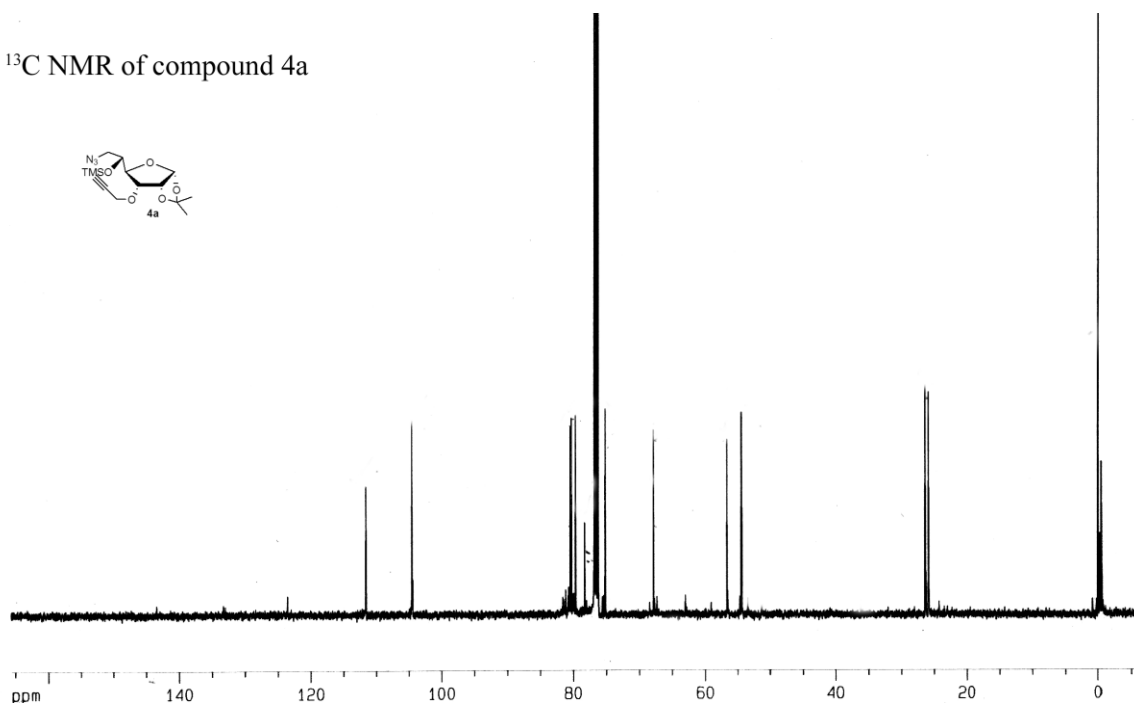

### $^1\text{H}$ NMR of compound 5a

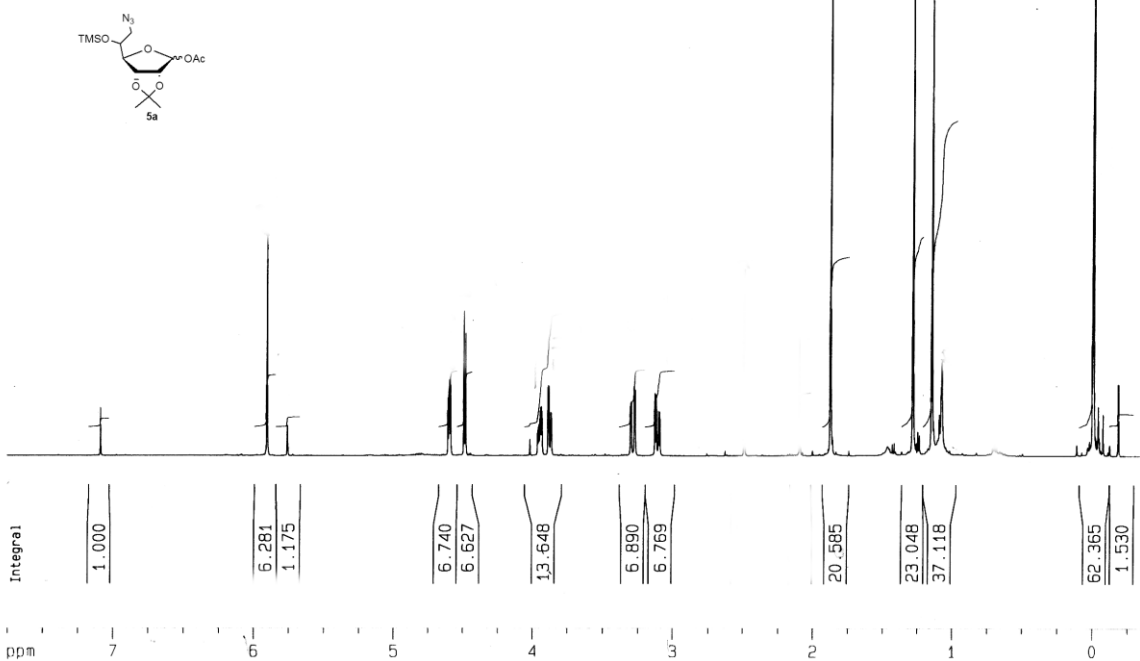

### $^{13}\text{C}$ NMR of compound 5a

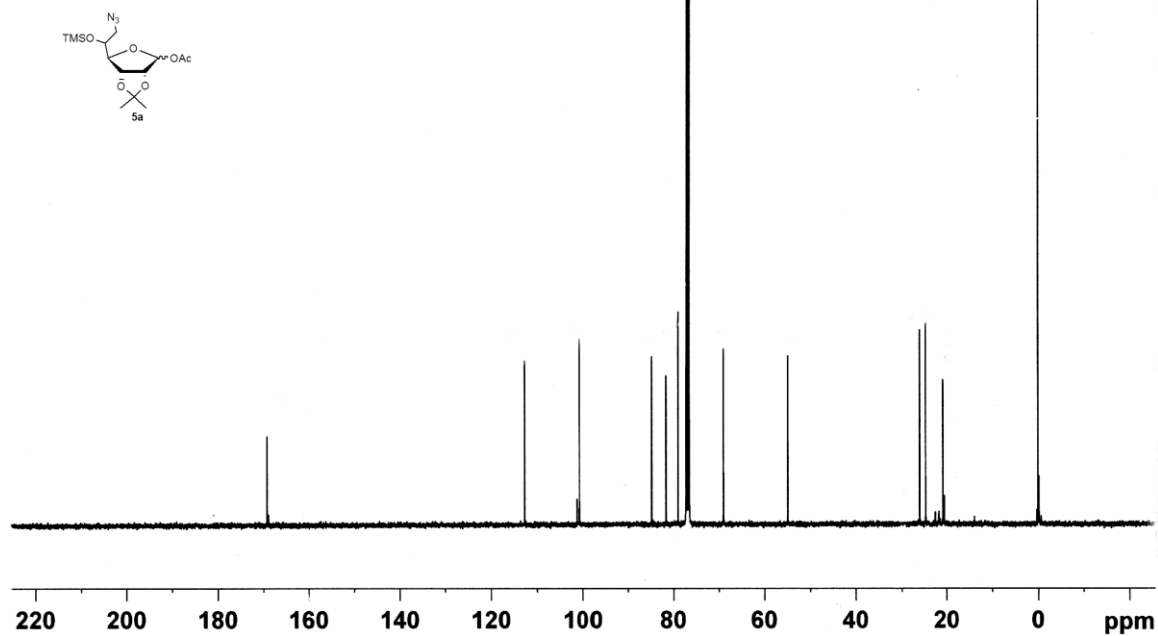

### <sup>1</sup>H NMR of compound 6a

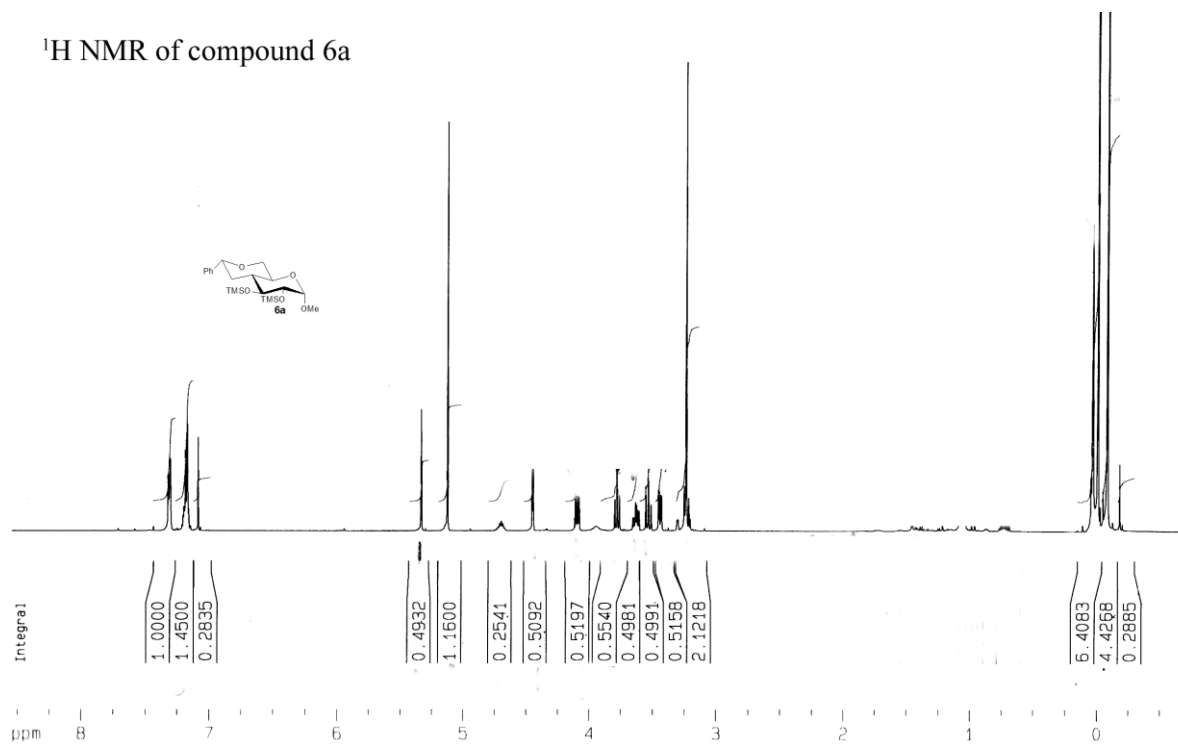

### <sup>13</sup>C NMR of compound 6a

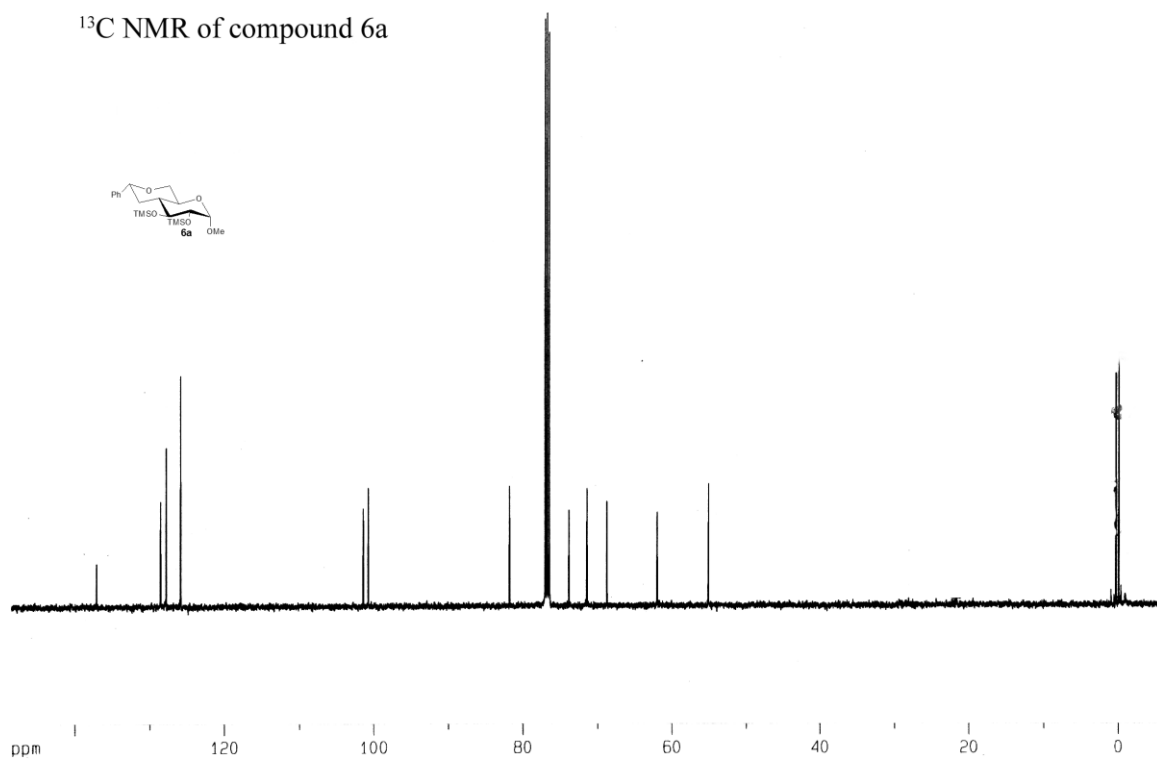

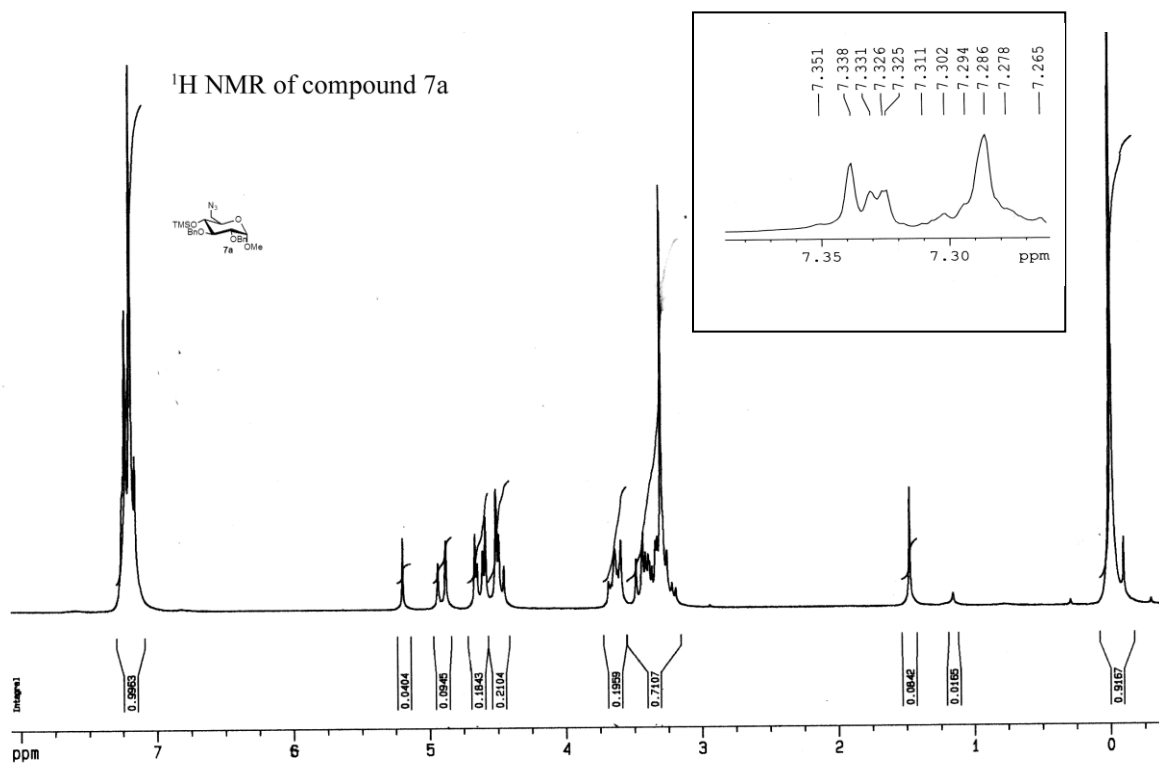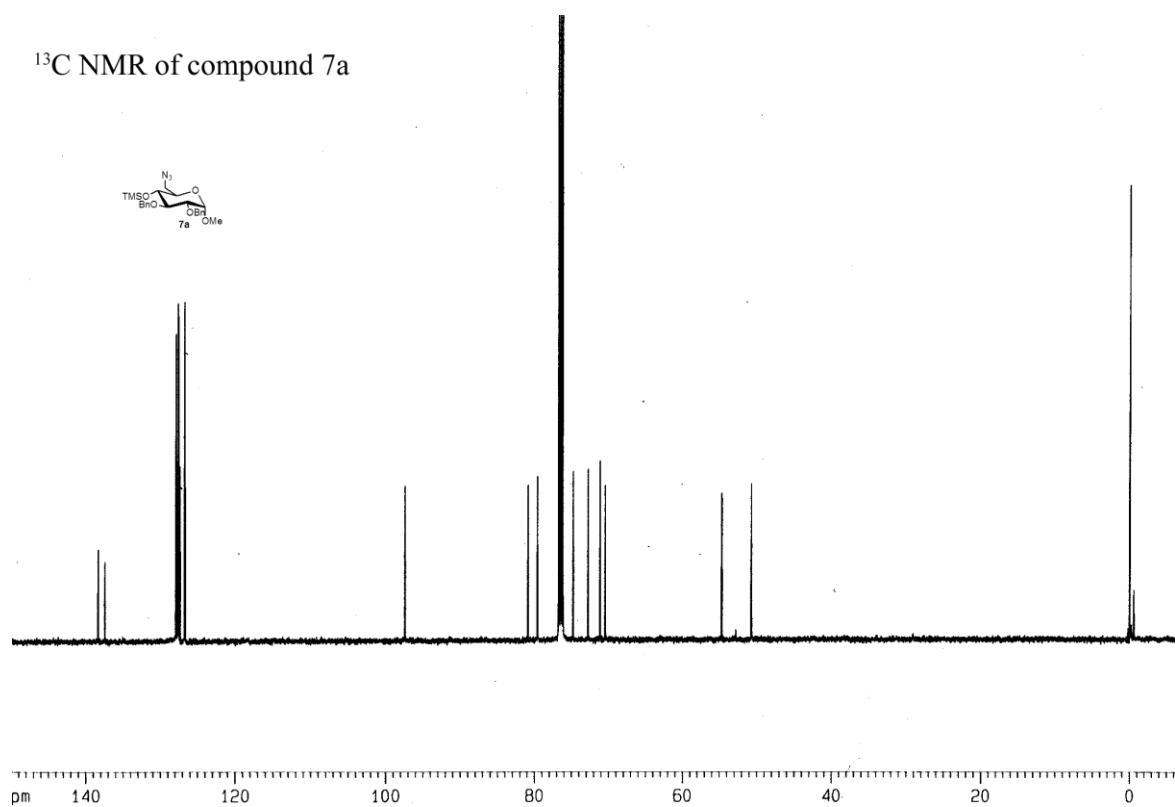



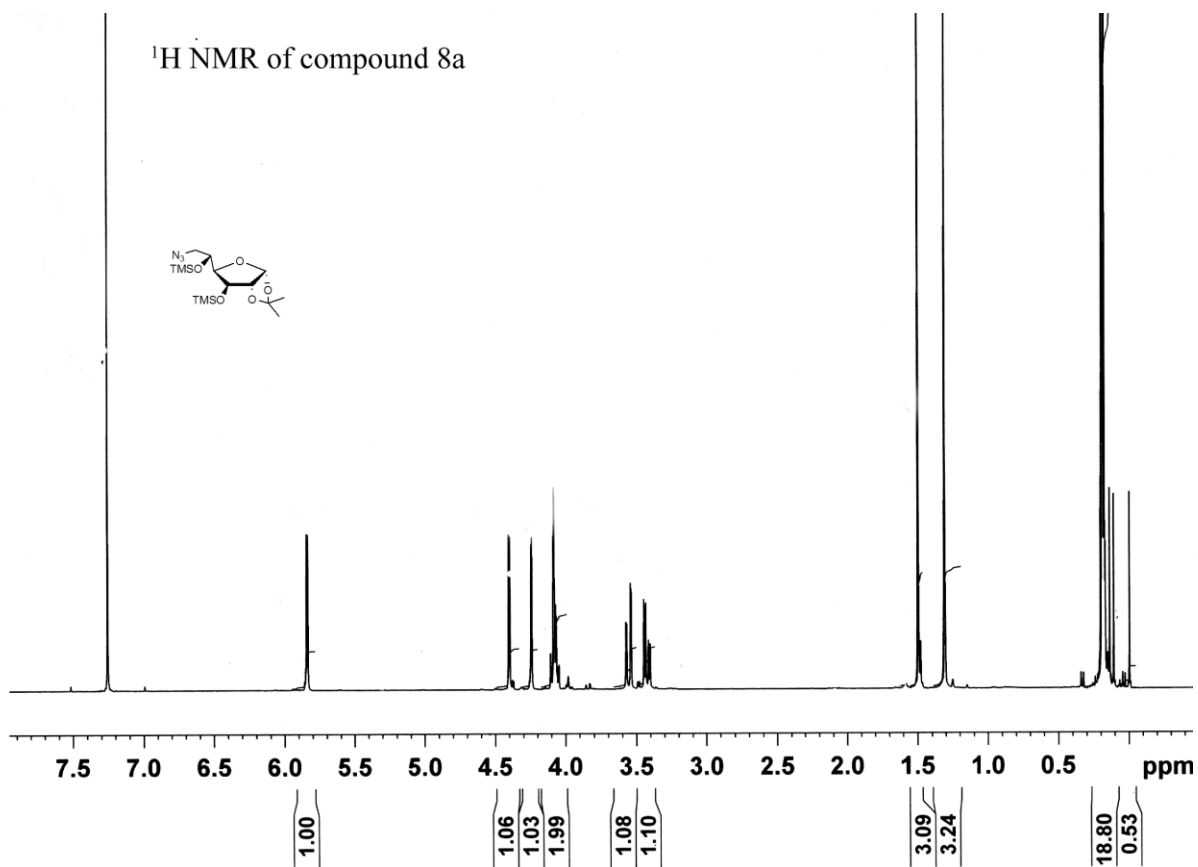

<sup>13</sup>C NMR of compound 8a

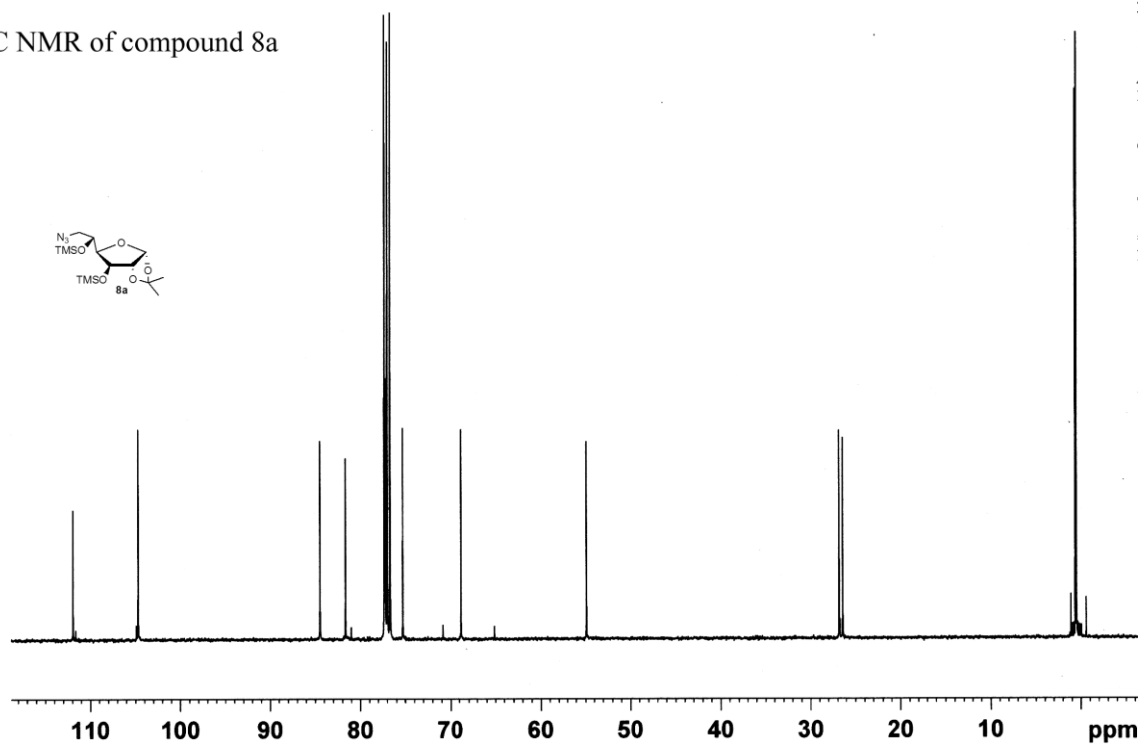

### $^1\text{H}$ NMR of compound 9a

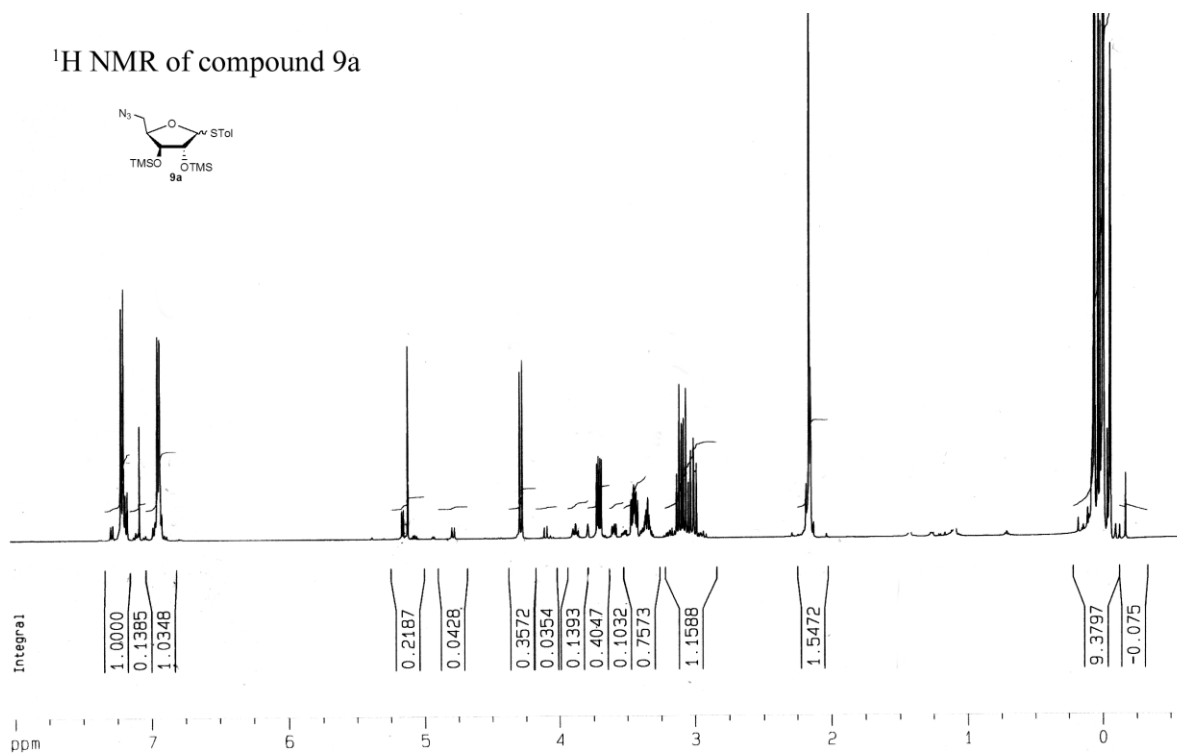

### $^{13}\text{C}$ NMR of compound 9a

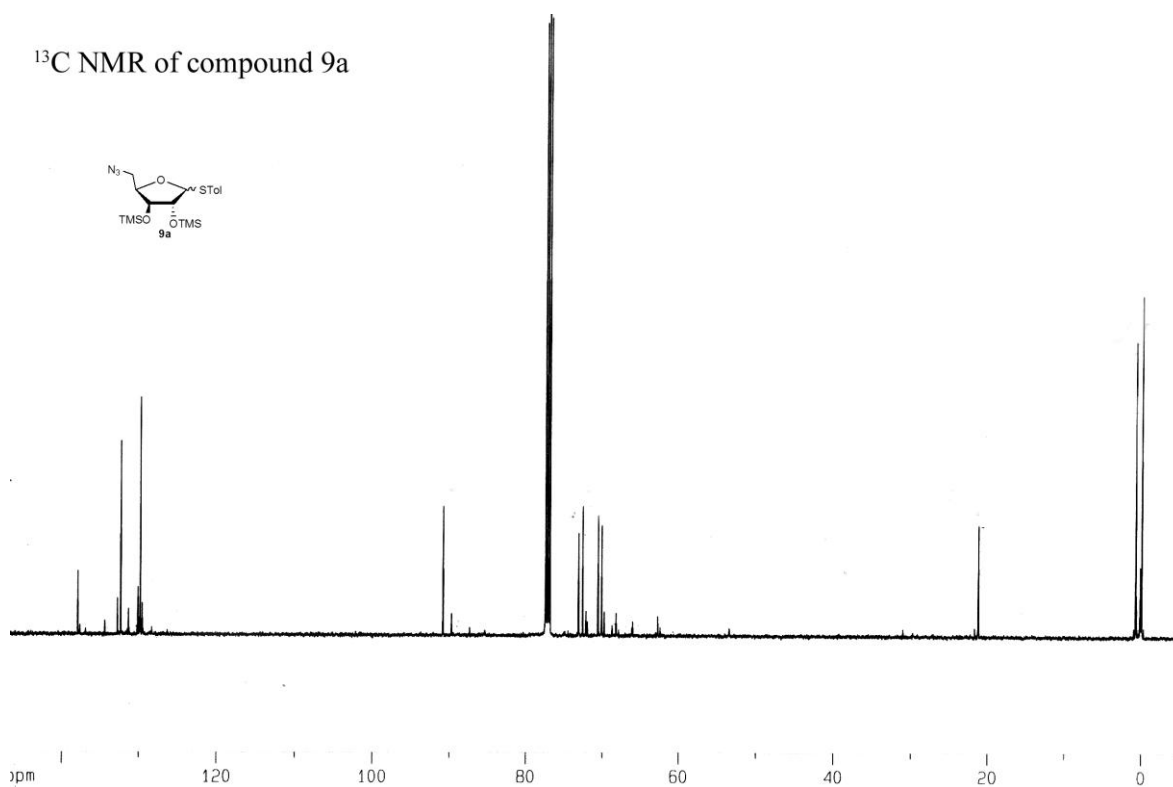

### <sup>1</sup>H NMR of compound 10a

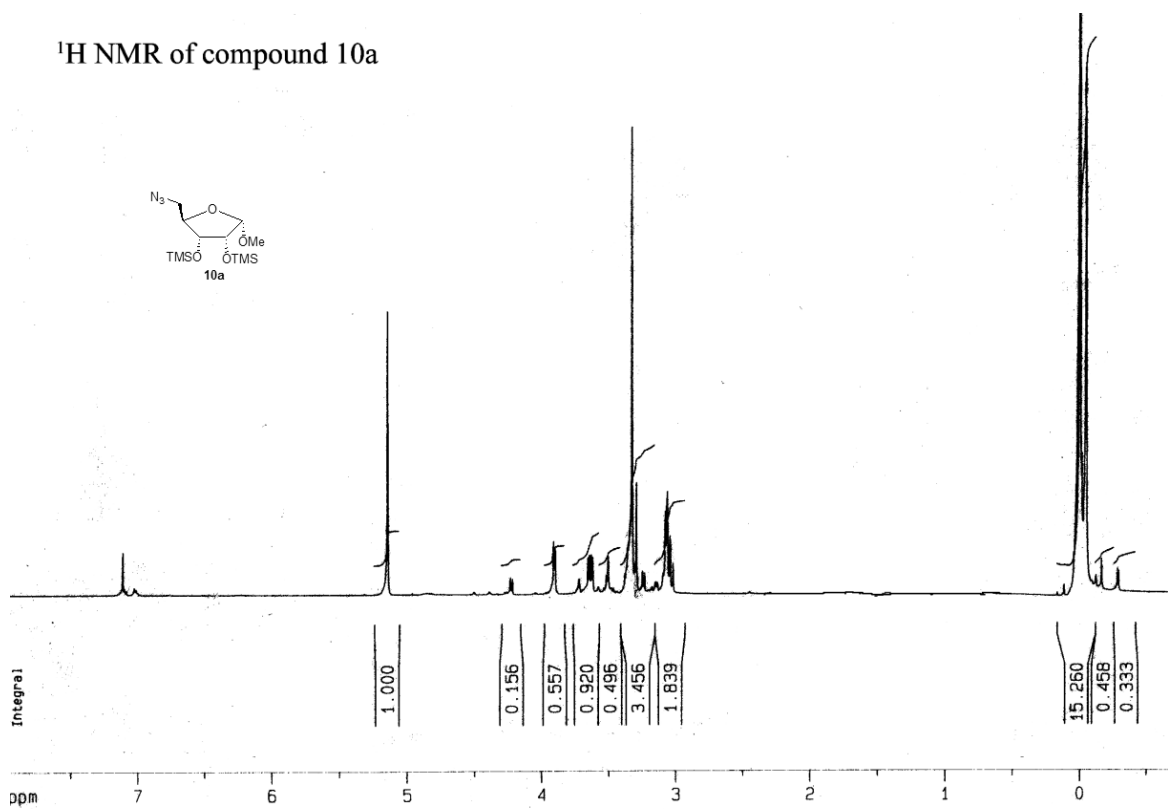

### <sup>13</sup>C NMR of compound 10a

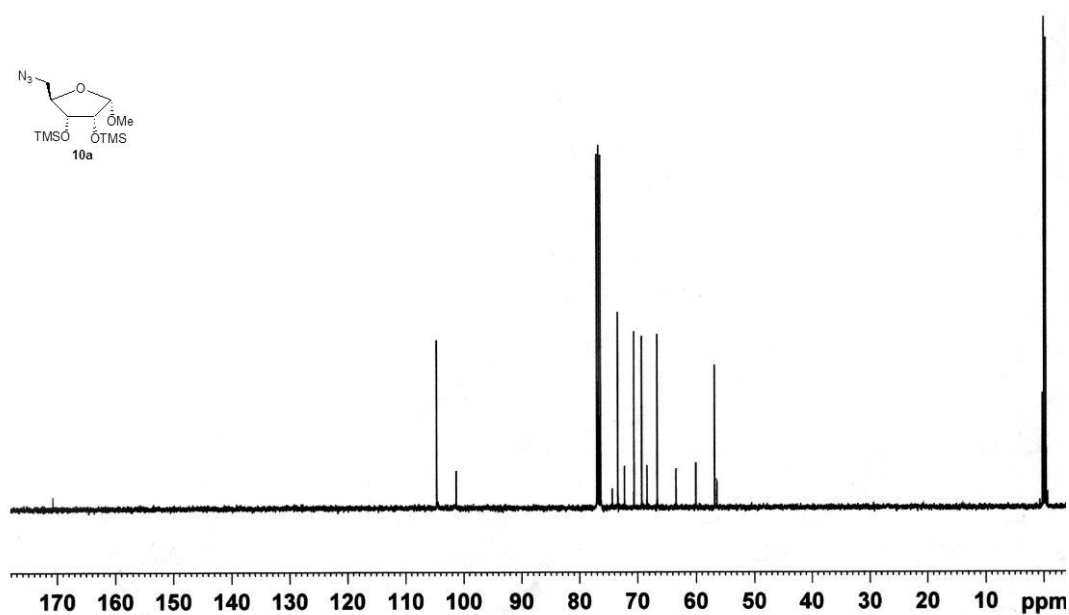

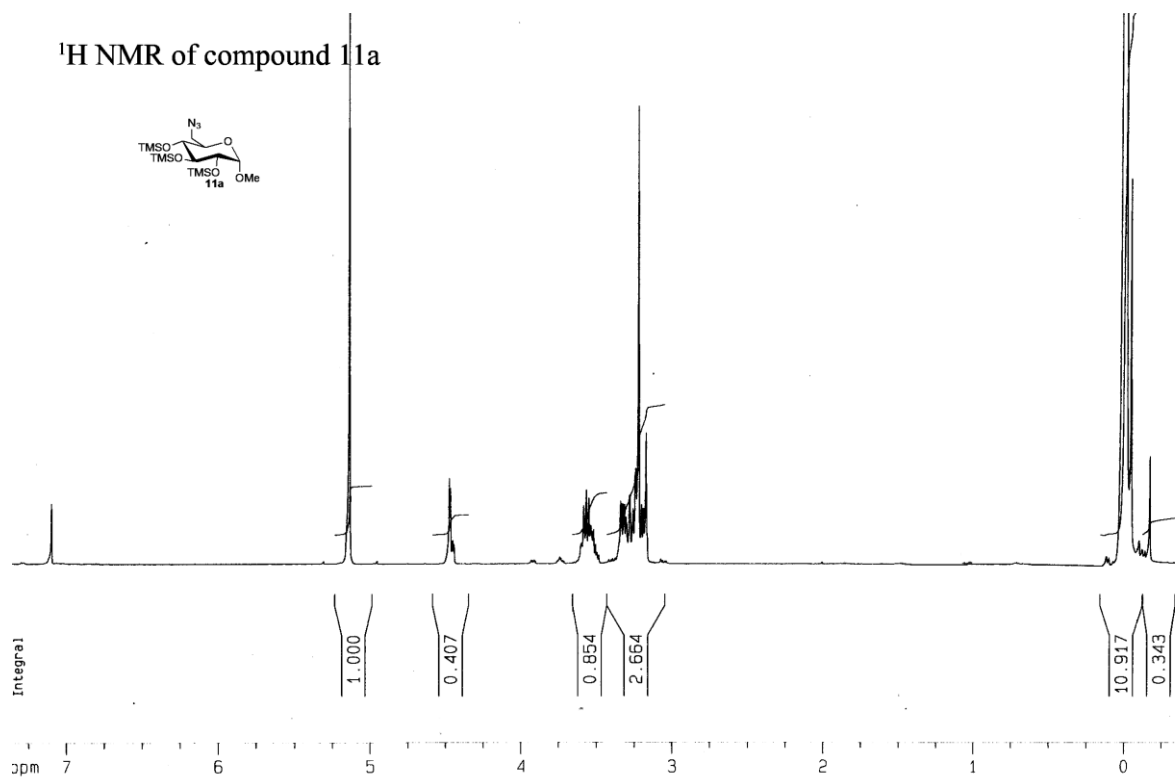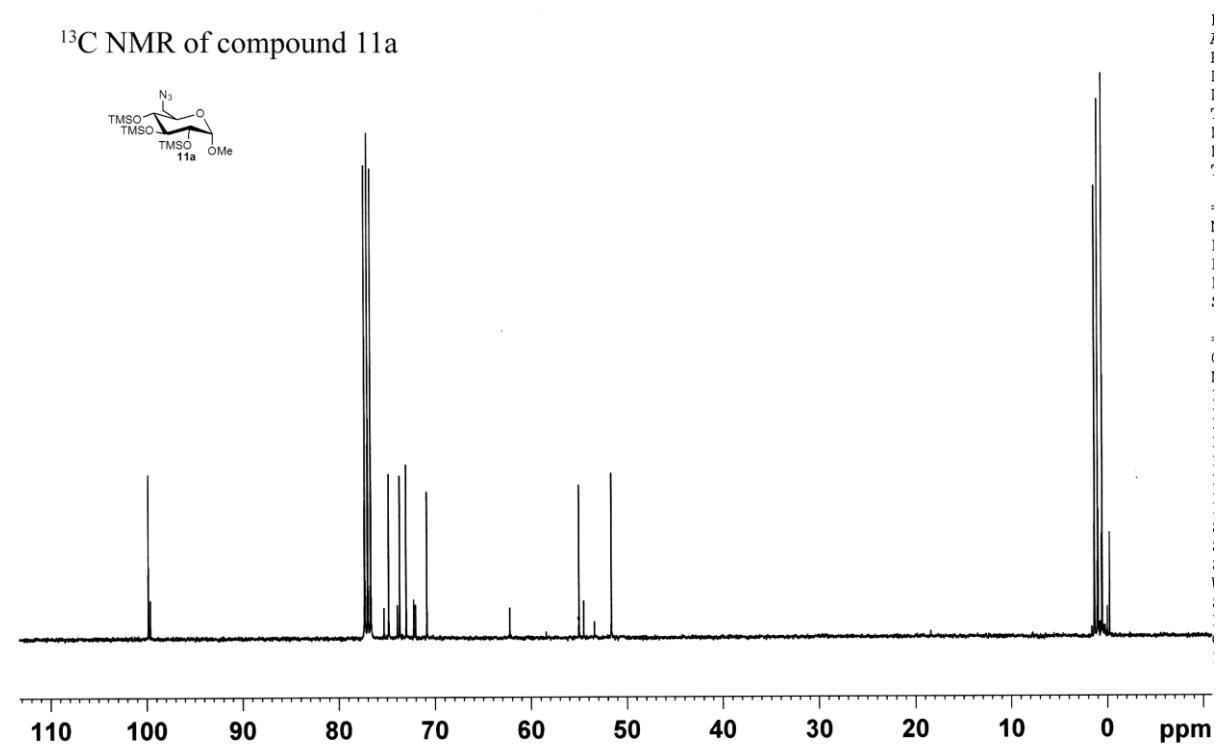

<sup>1</sup>H NMR of compound 12a

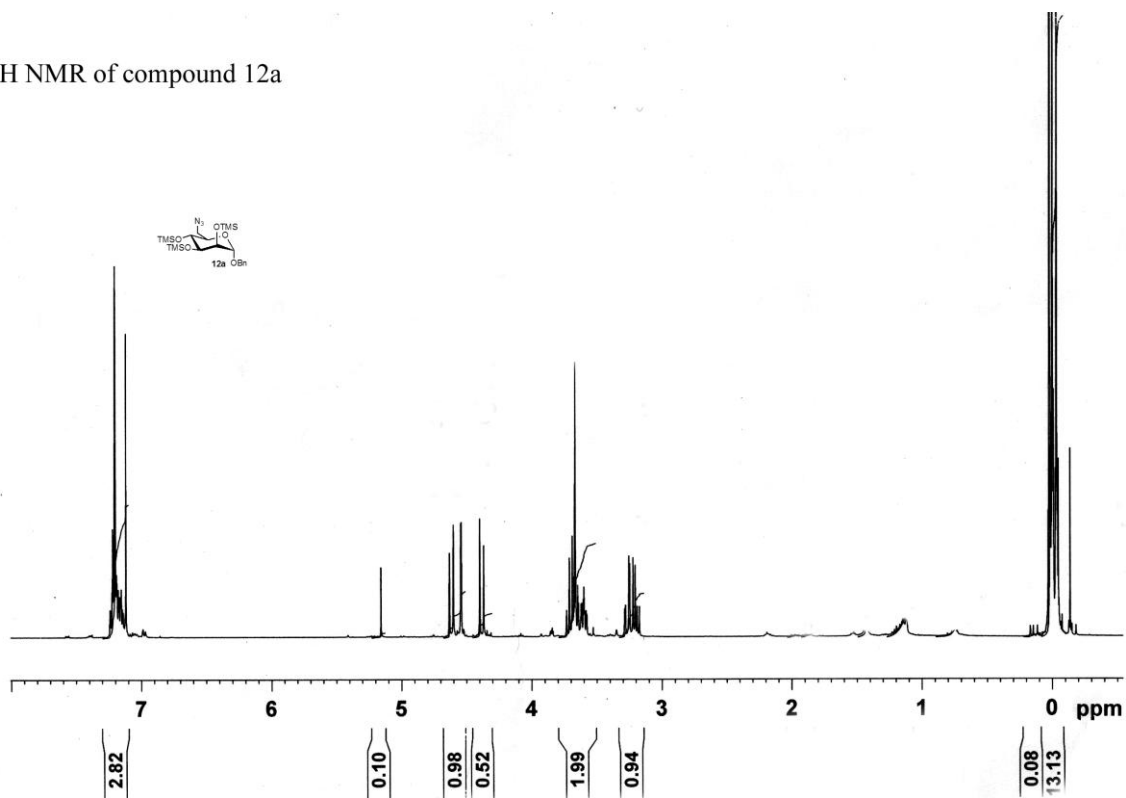

<sup>13</sup>C NMR of compound 12a

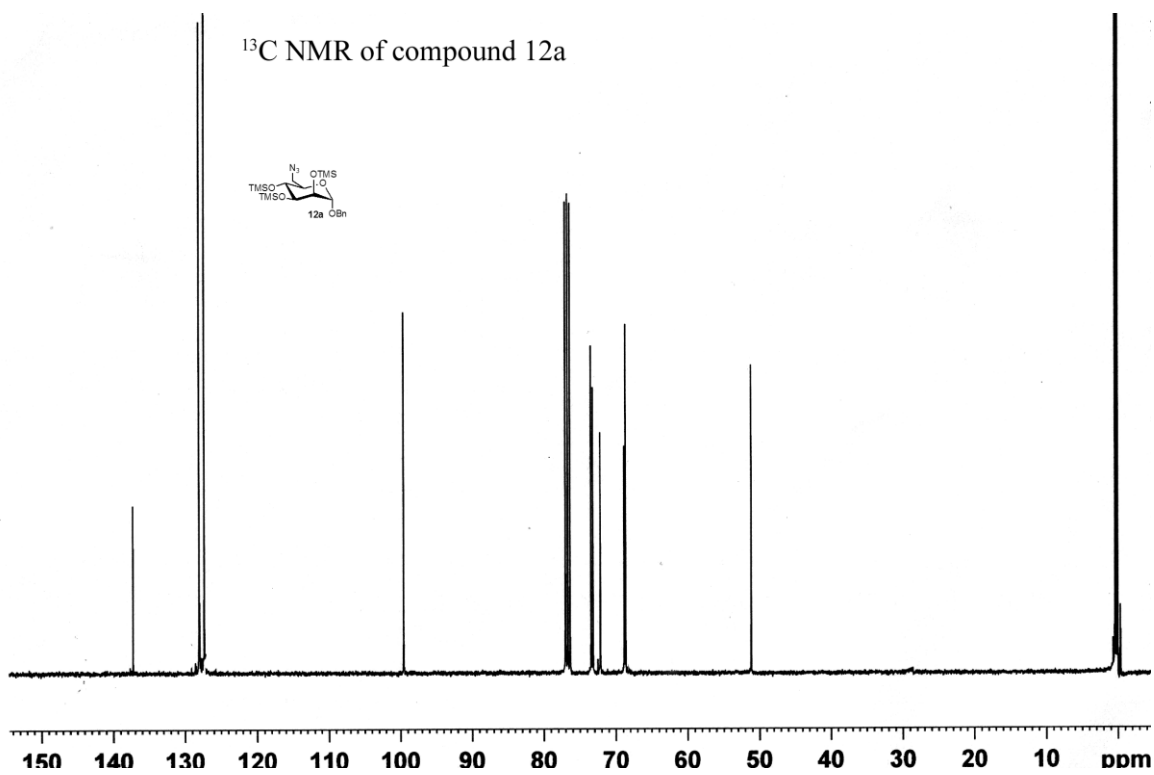

### $^1\text{H}$ NMR of compound 13a

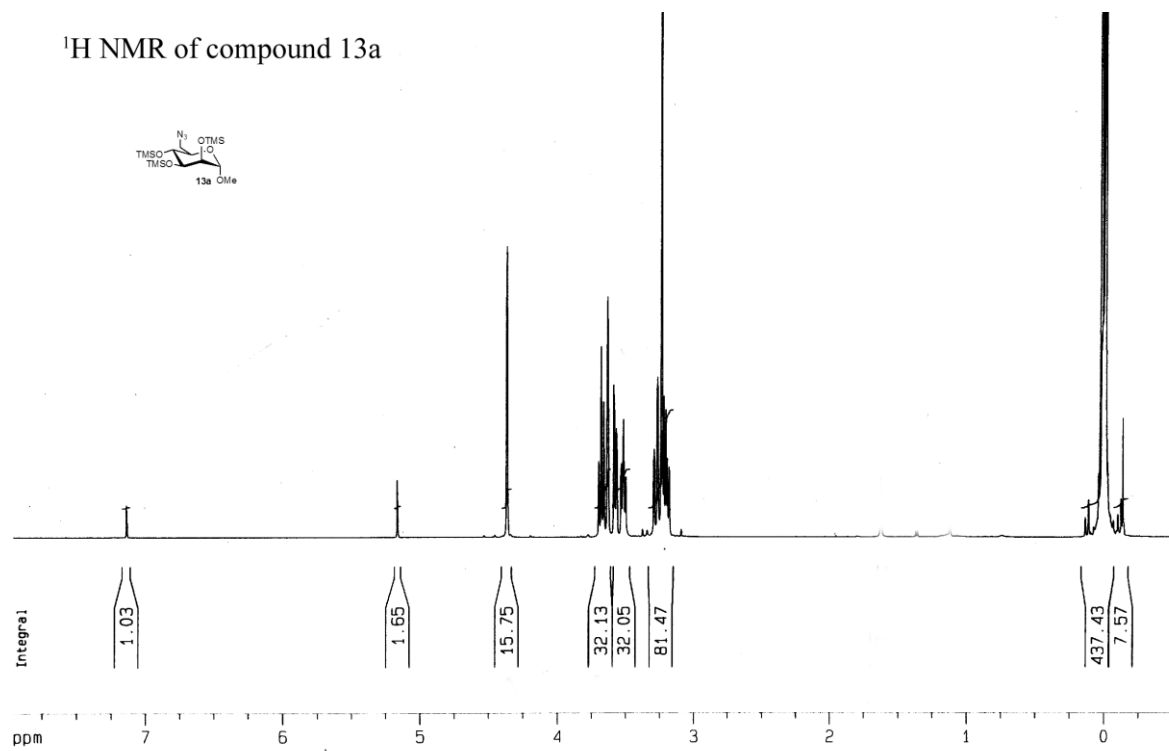

### $^{13}\text{C}$ NMR of compound 13a

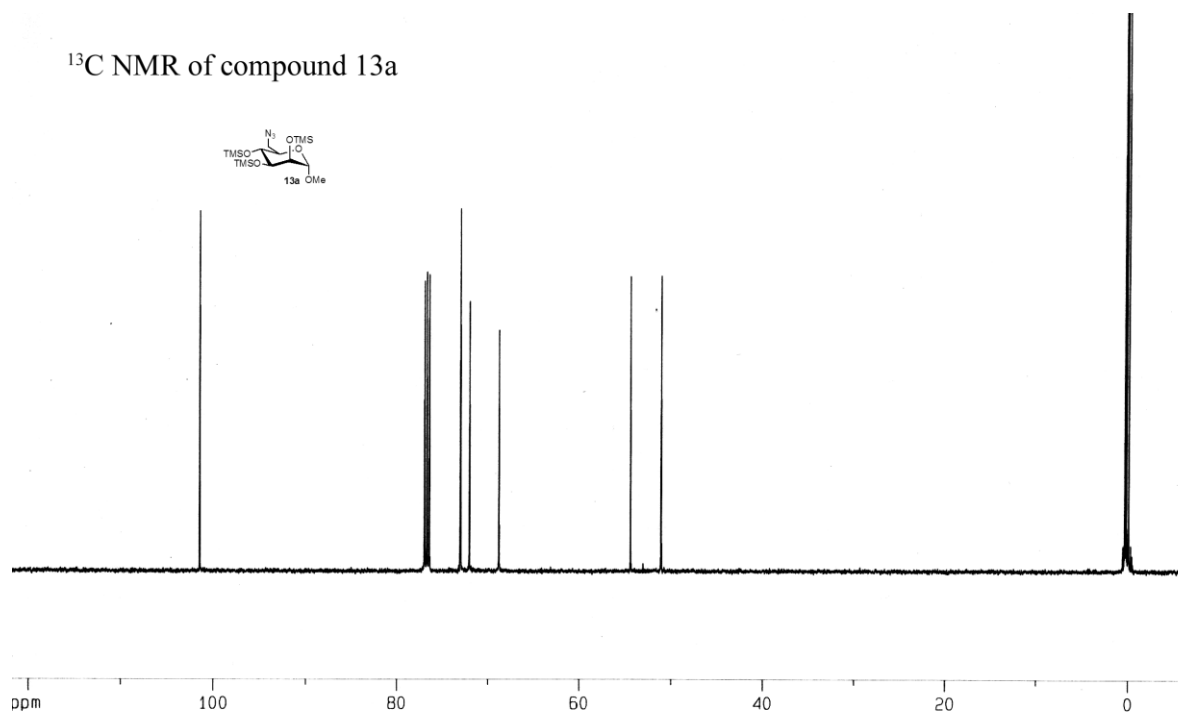

$^1\text{H}$  NMR of compound 14a

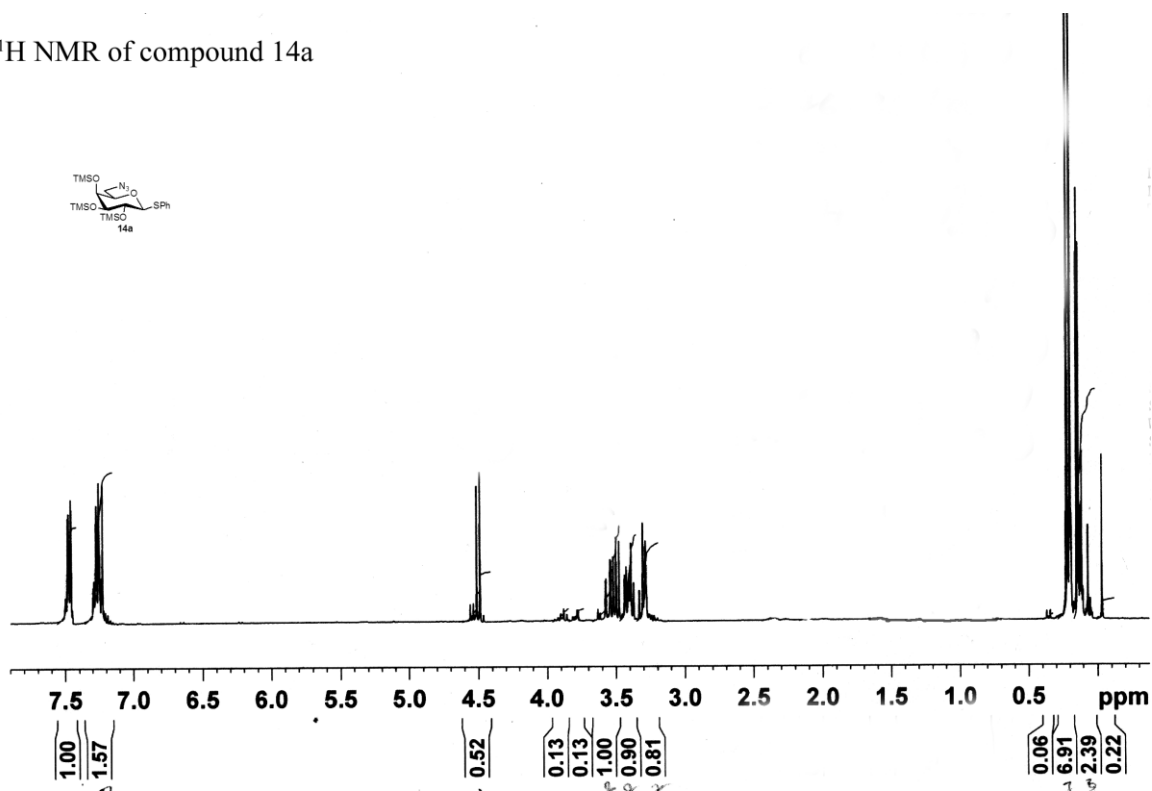

$^{13}\text{C}$  NMR of compound 14a

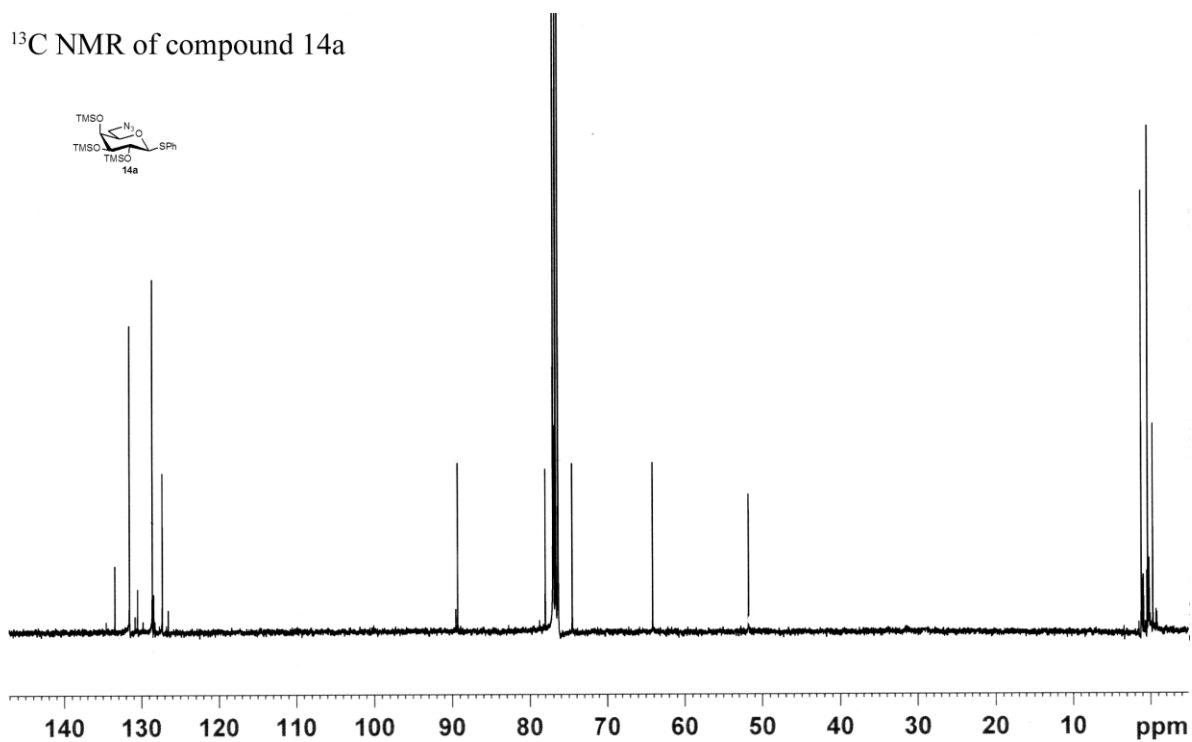

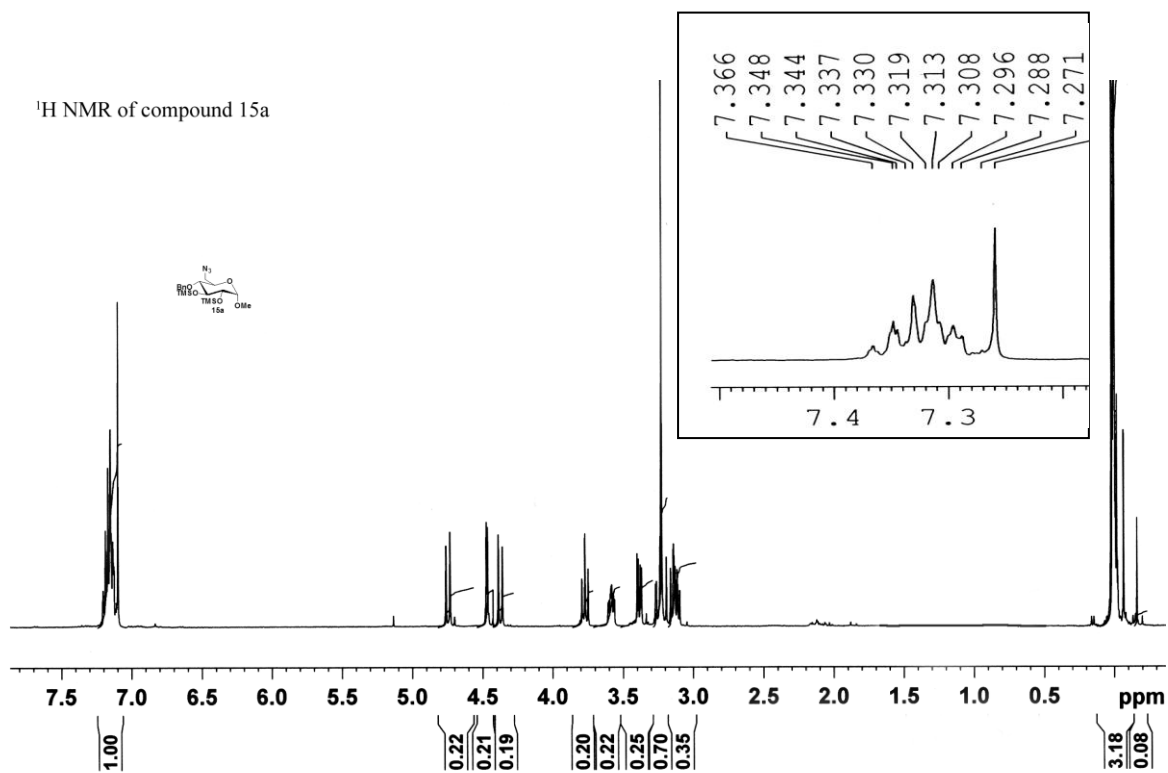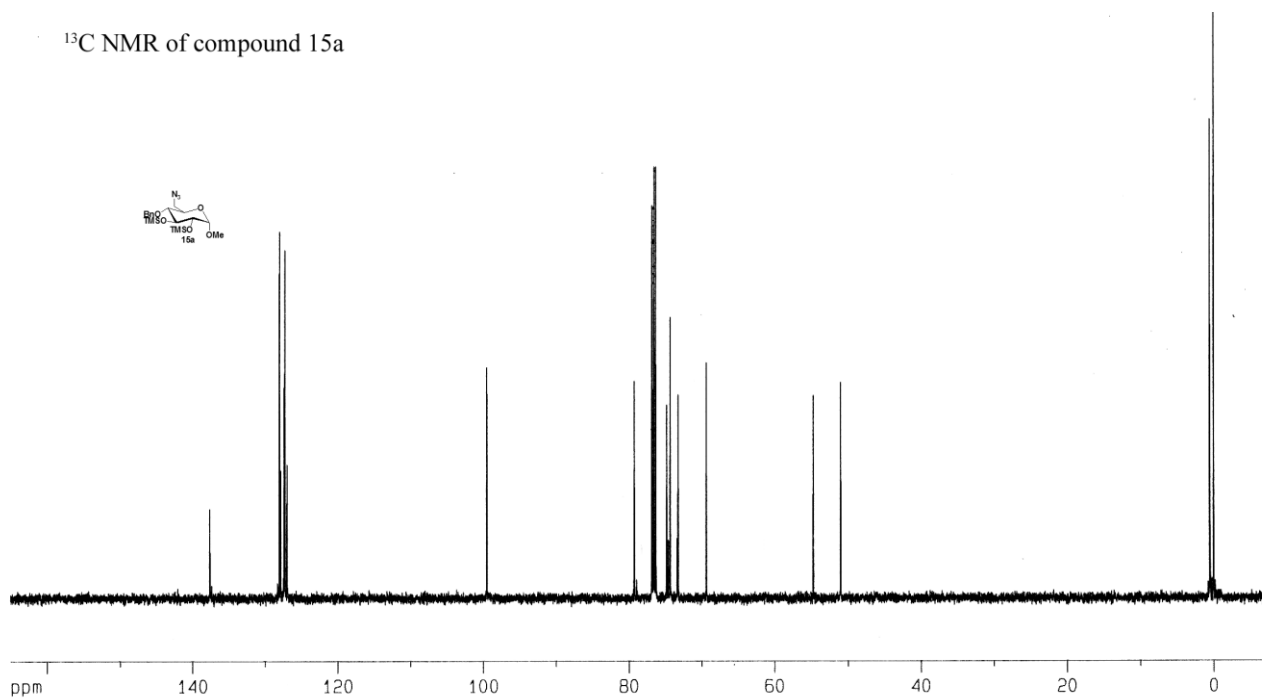



<sup>1</sup>H NMR of compound 16a

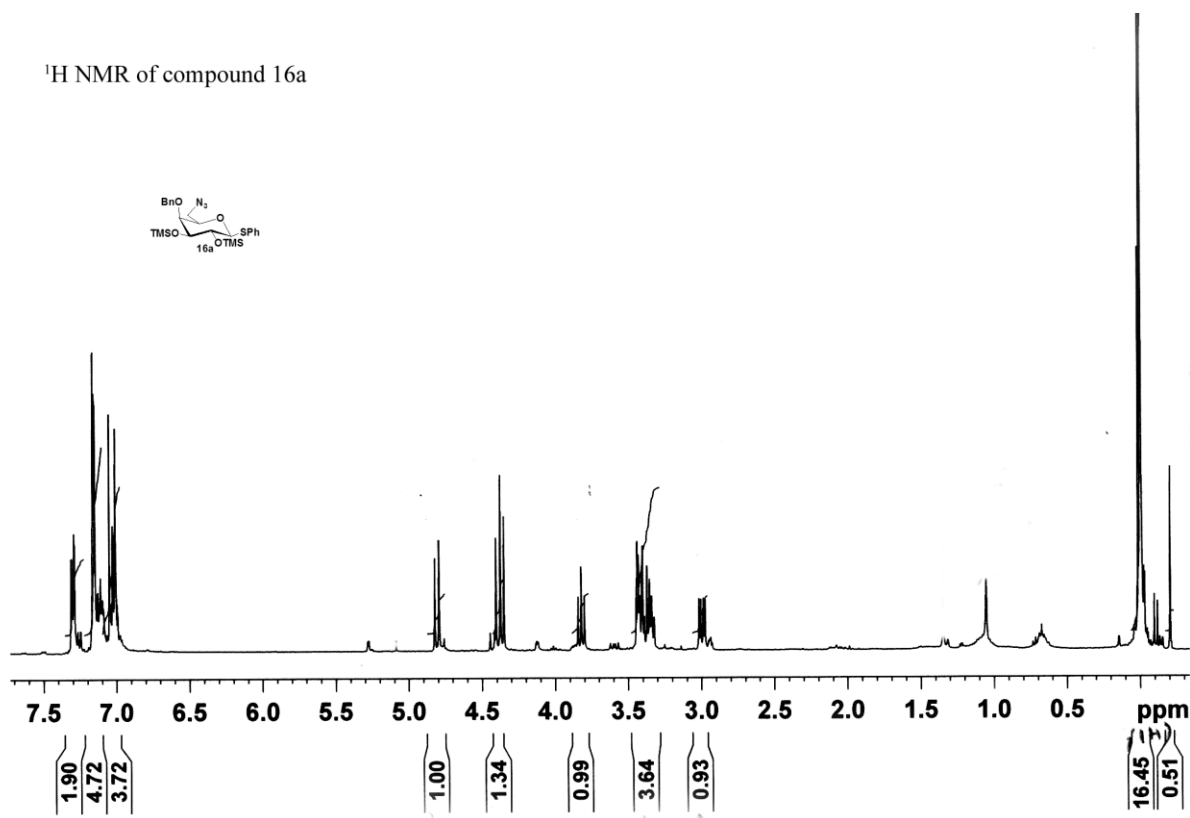

<sup>13</sup>C NMR of compound 16a

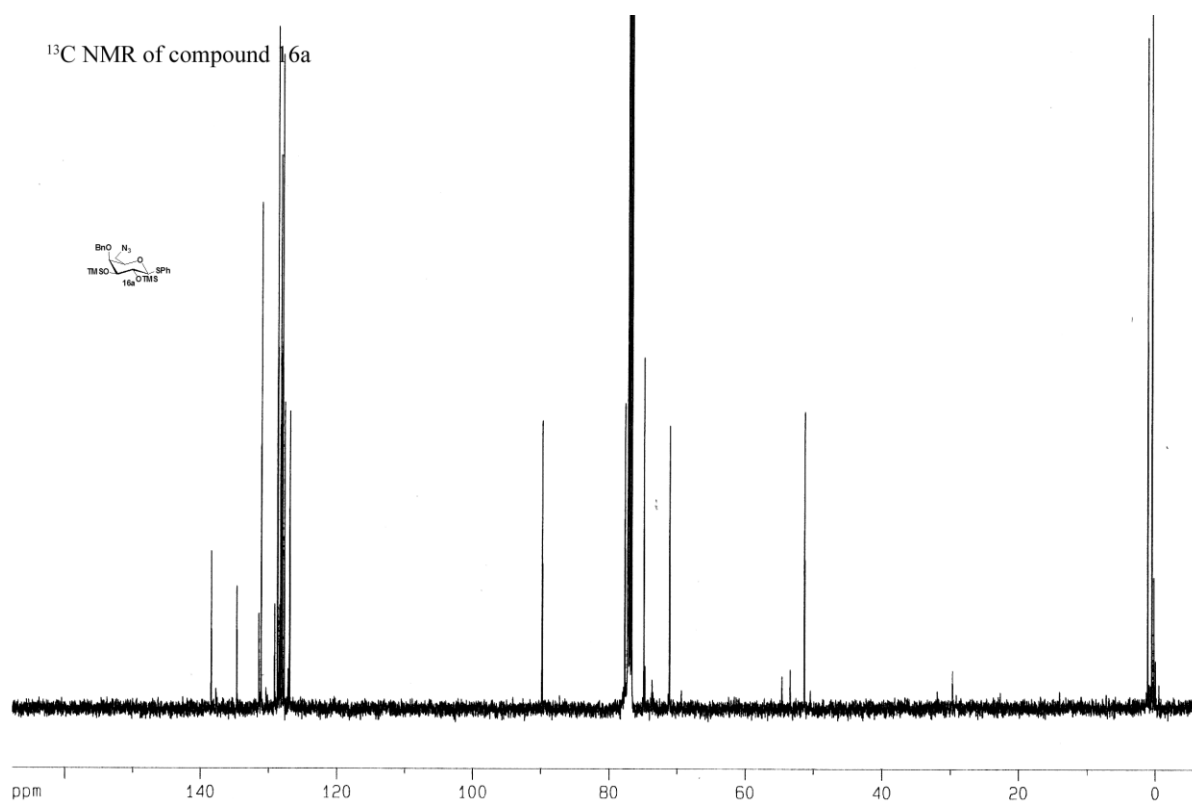

$^1\text{H}$  NMR of compound 17a

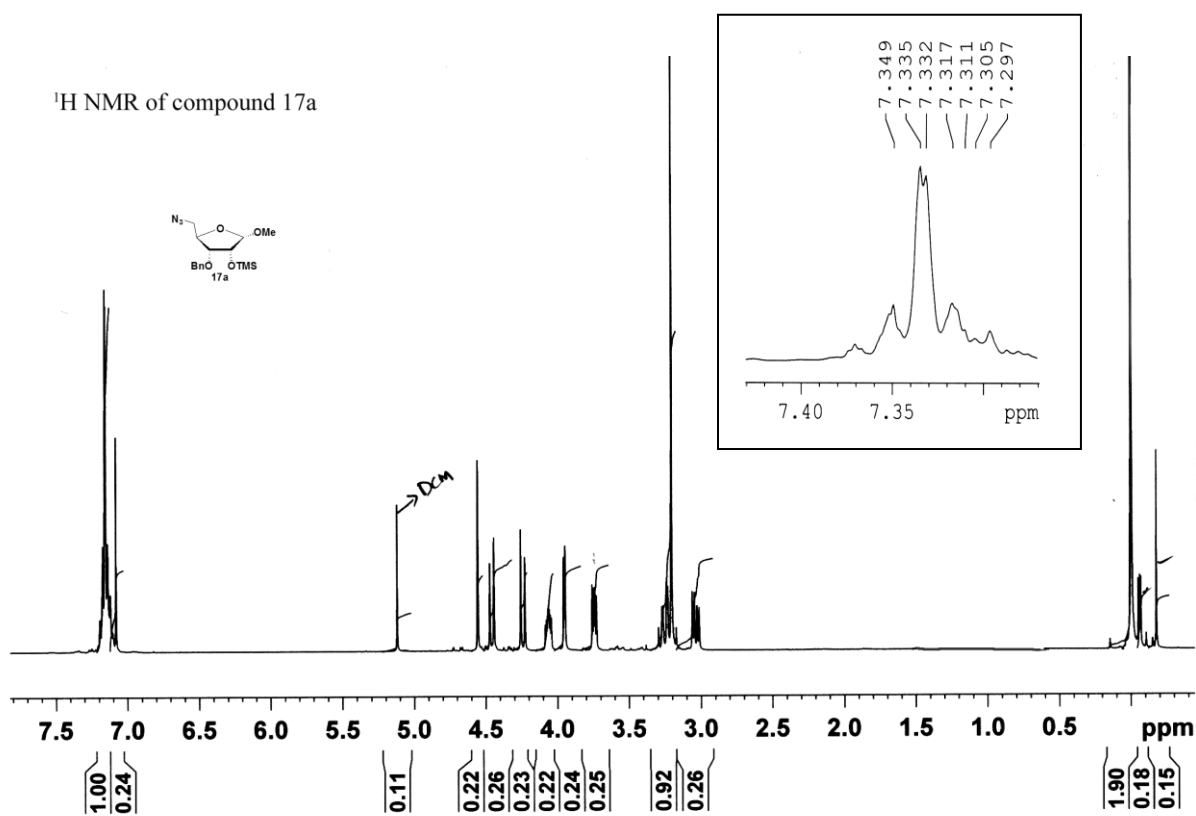

$^{13}\text{C}$  NMR of compound 17a

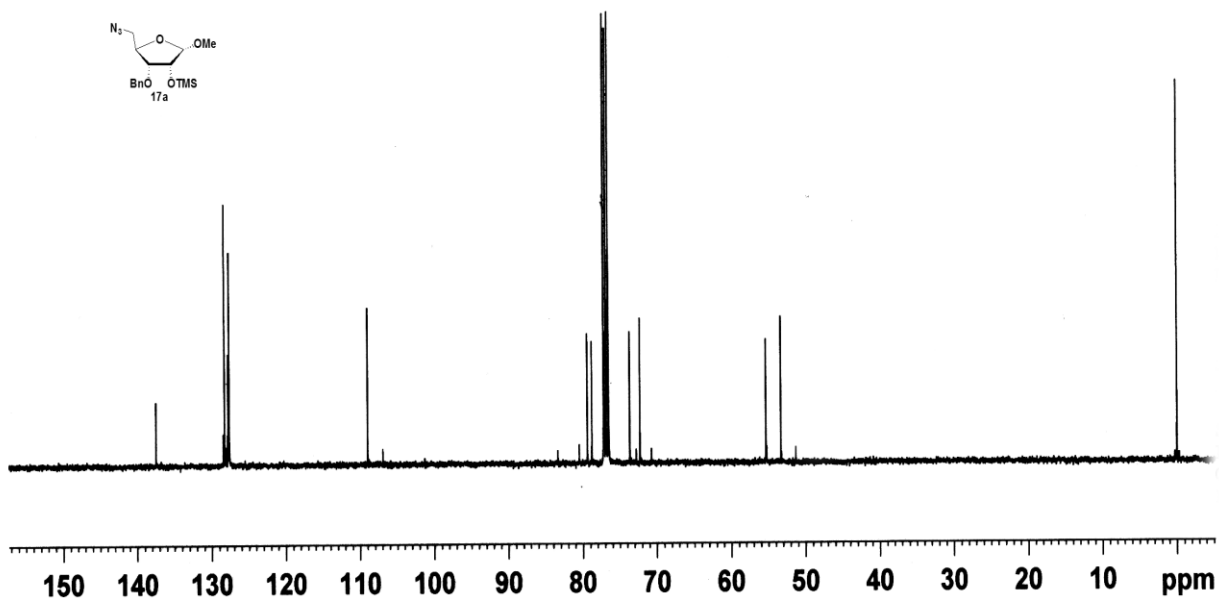

<sup>1</sup>H NMR of compound 18a

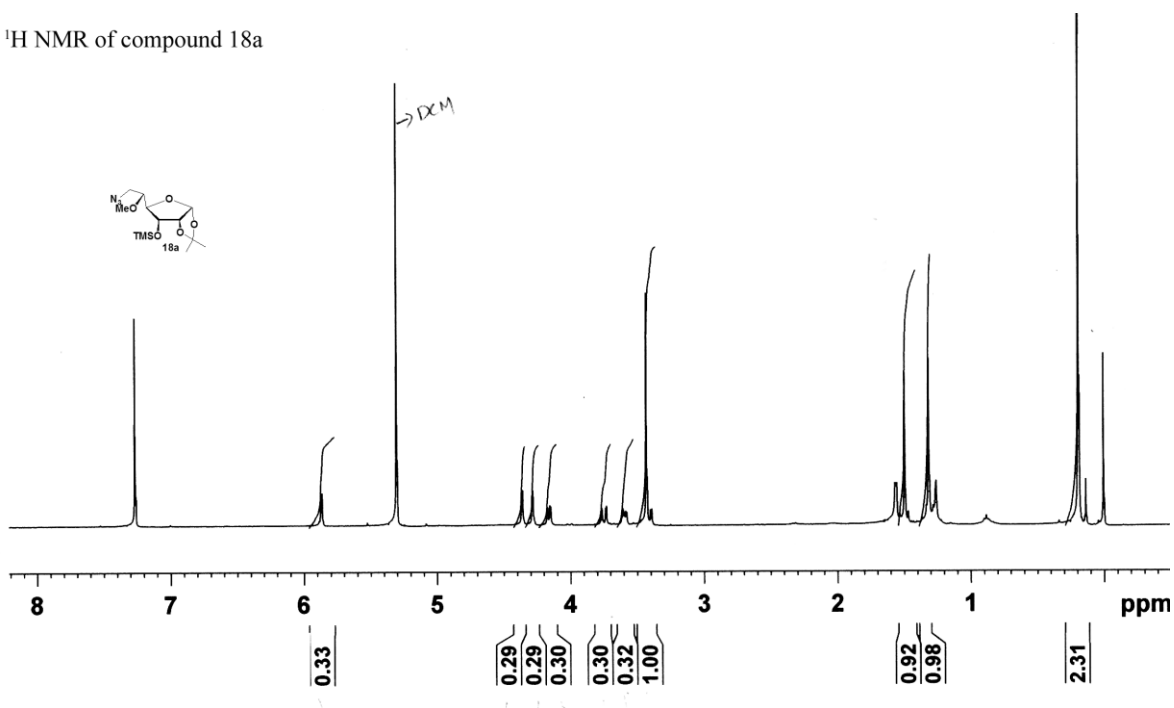

<sup>13</sup>C NMR of compound 18a

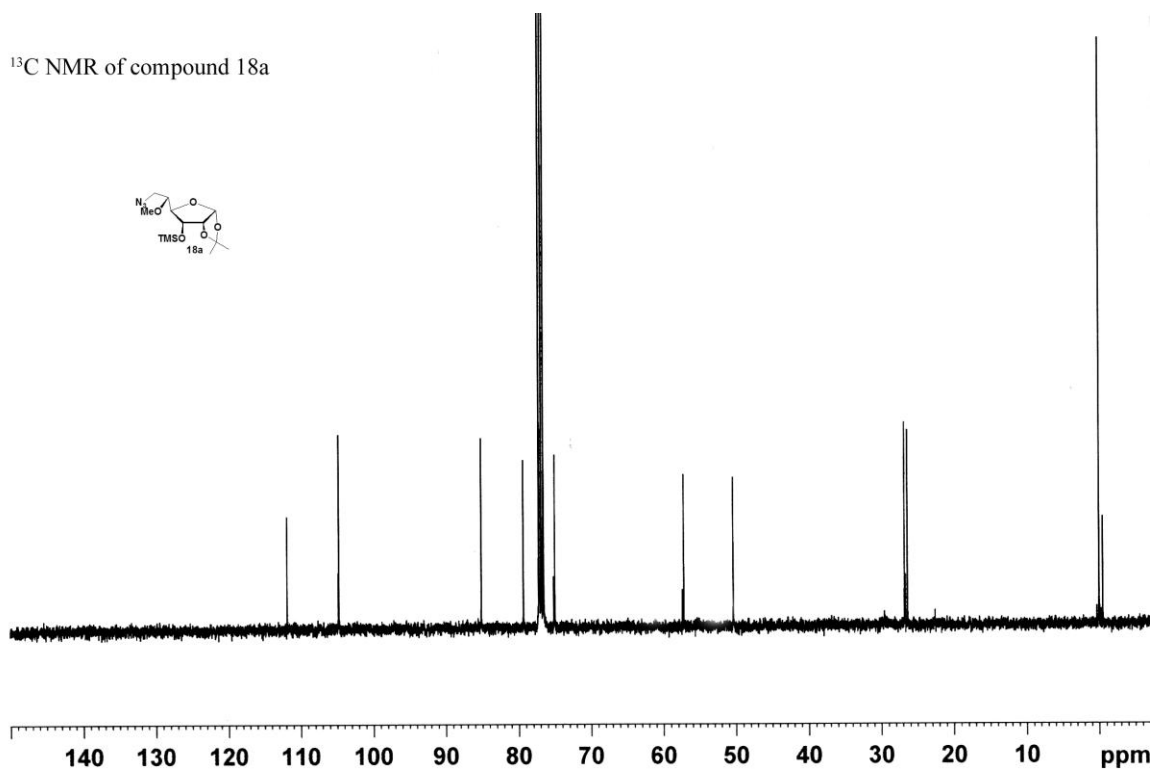

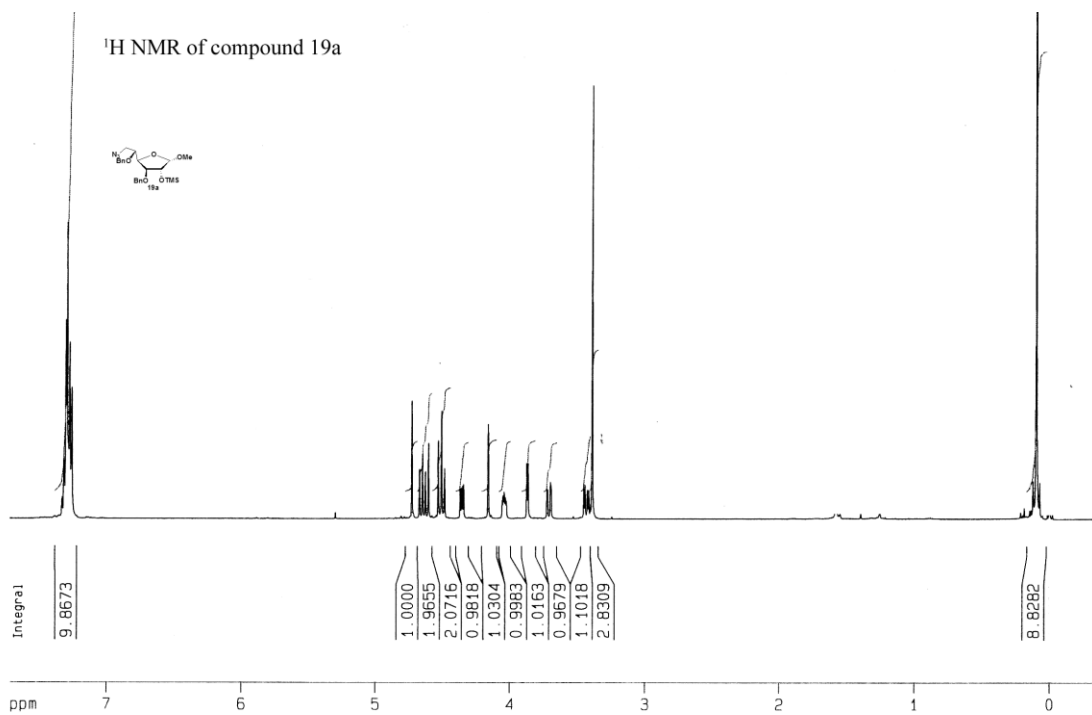

<sup>13</sup>C NMR of compound 19a

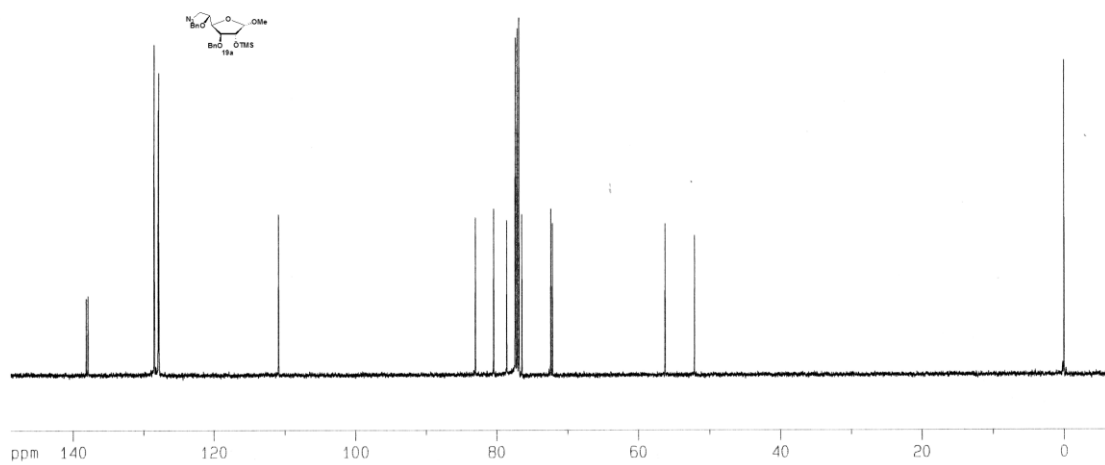

<sup>1</sup>H NMR of compound 21b

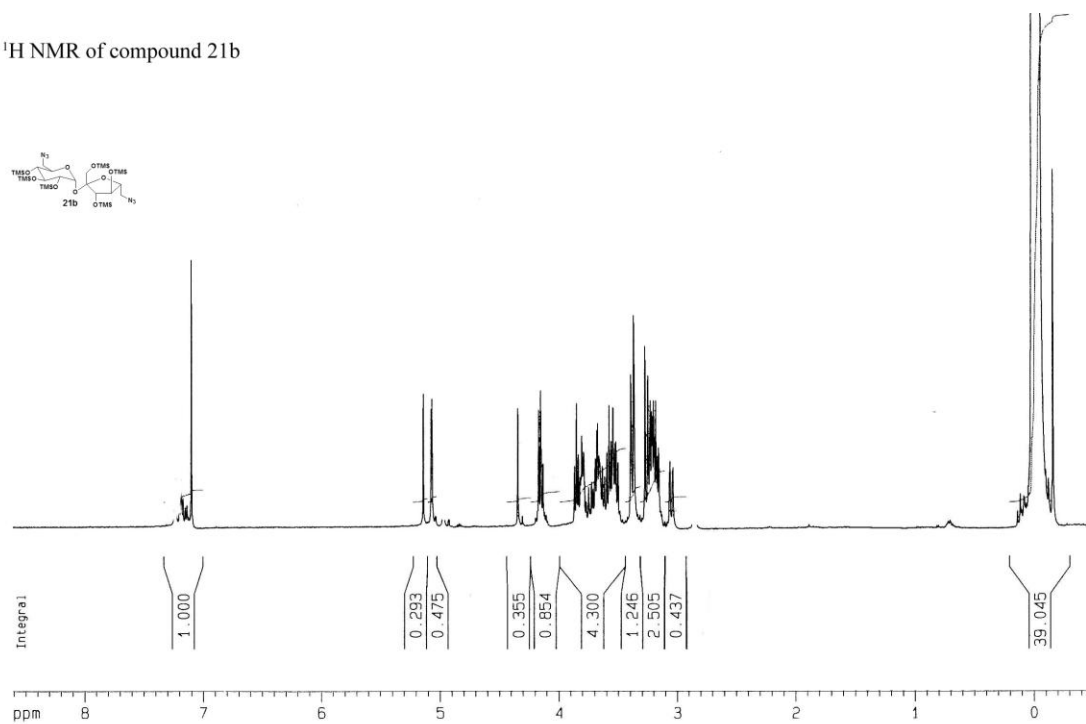

<sup>13</sup>C NMR of compound 21b

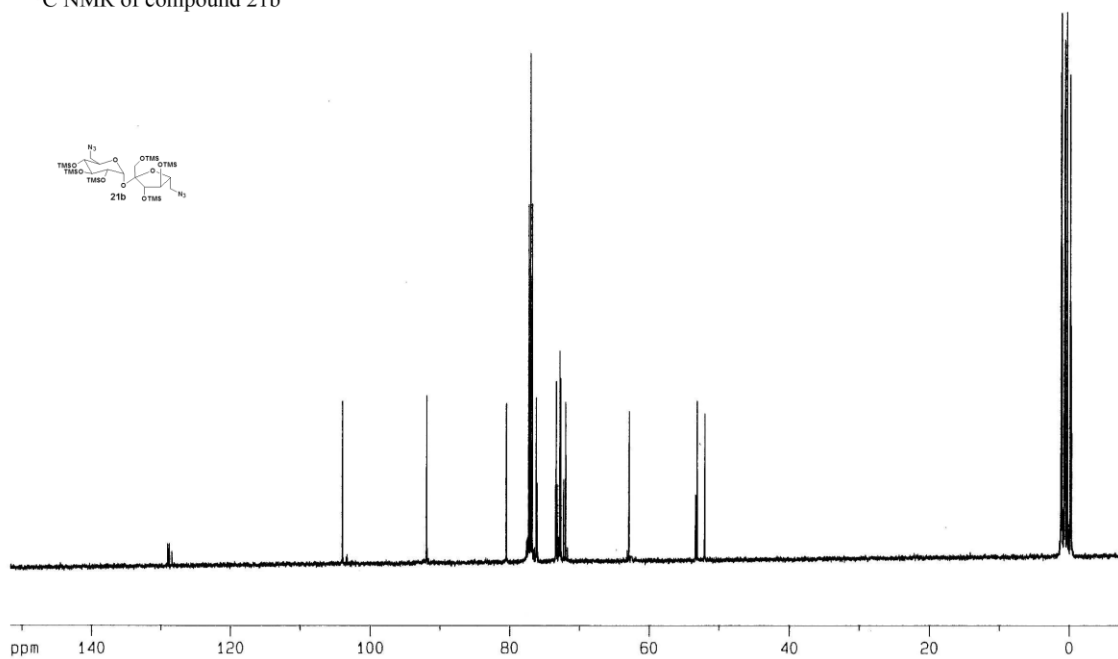

<sup>1</sup>H NMR of compound 22a

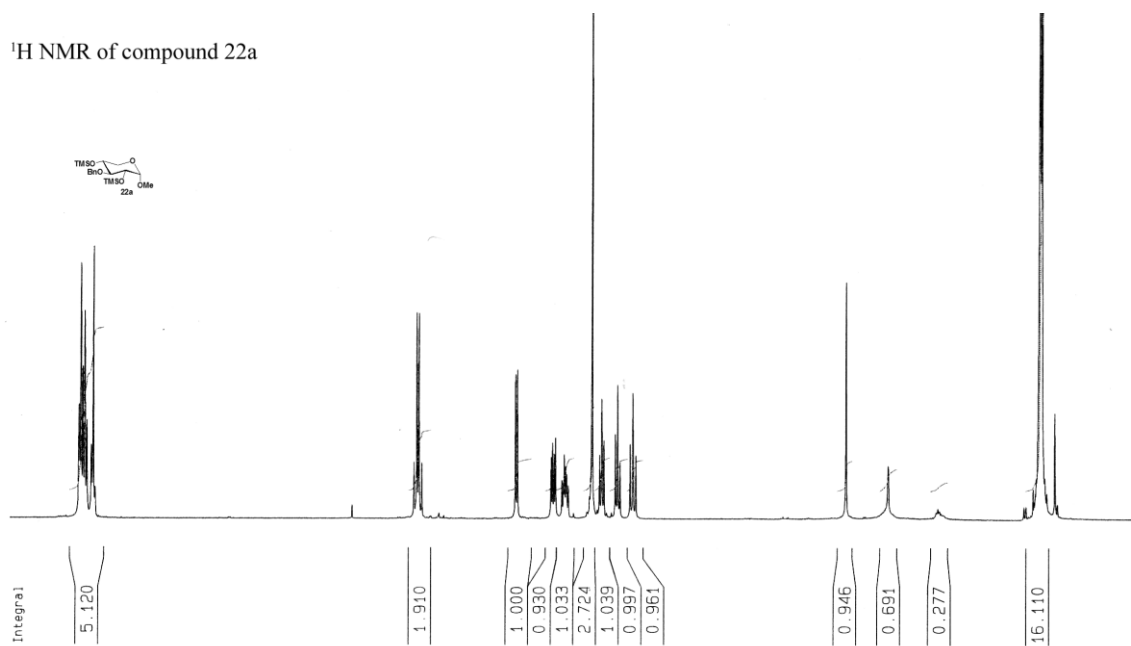

<sup>13</sup>C NMR of compound 22a

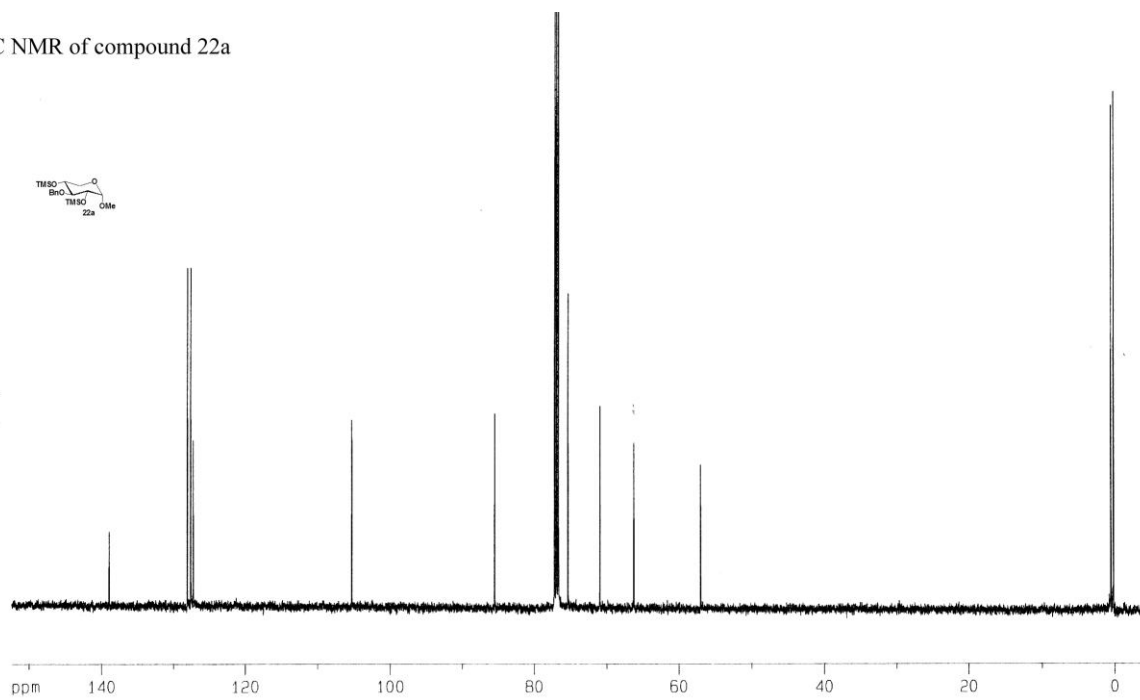

<sup>1</sup>H NMR of compound 23a

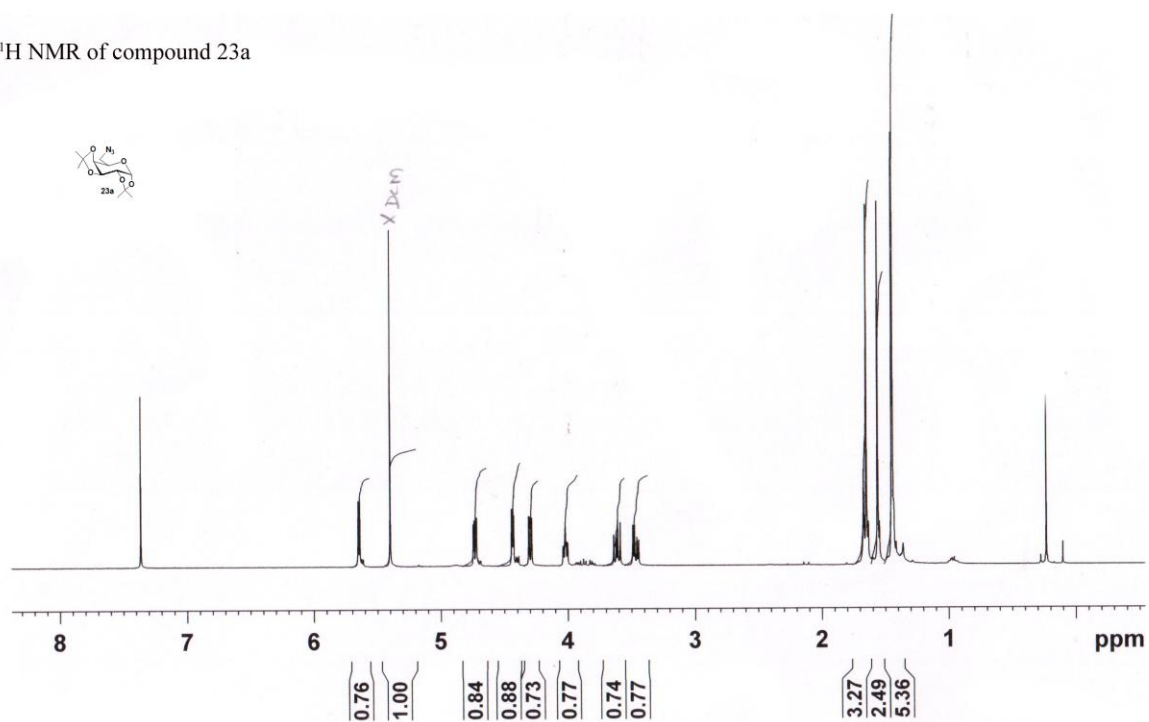

<sup>13</sup>C NMR of compound 23a

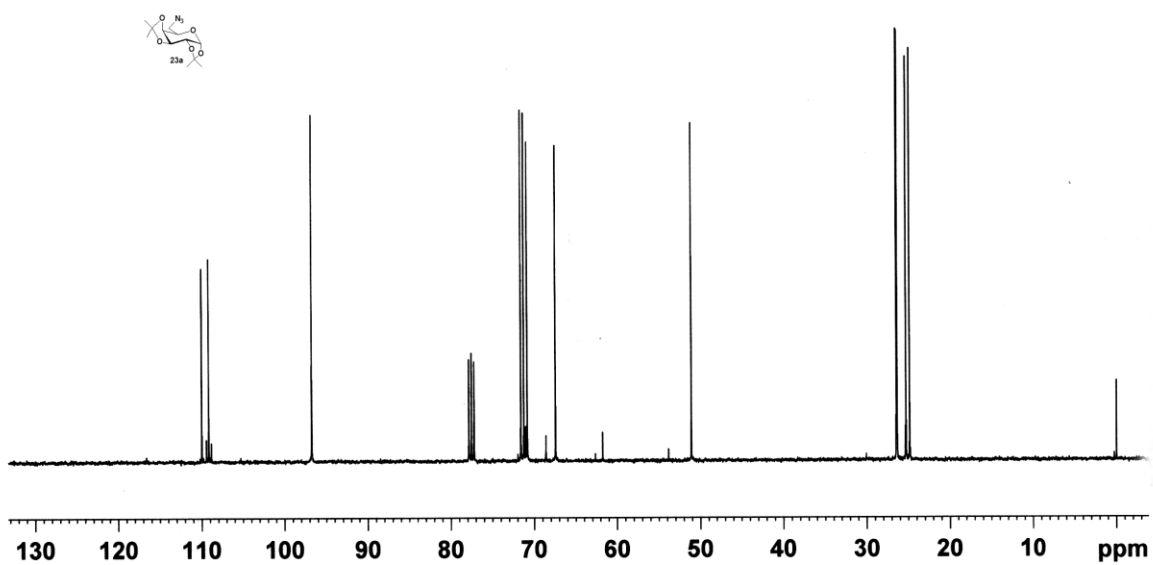

<sup>1</sup>H NMR of compound 24a

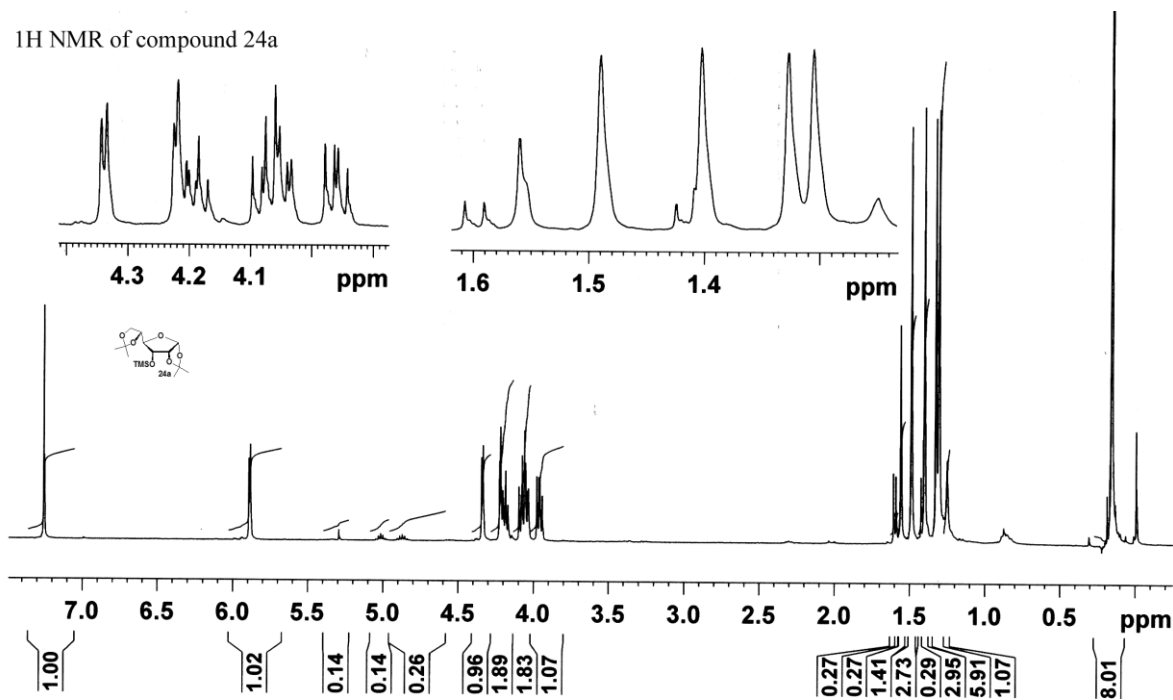





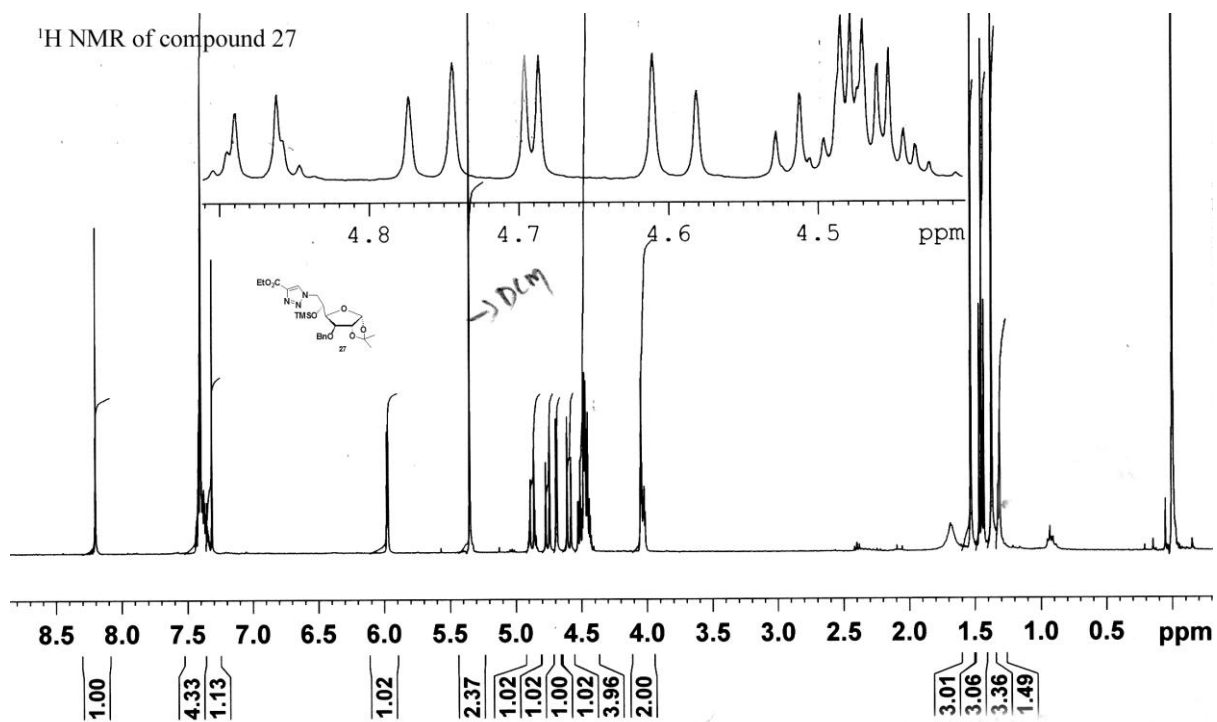

<sup>13</sup>C NMR of compound 27

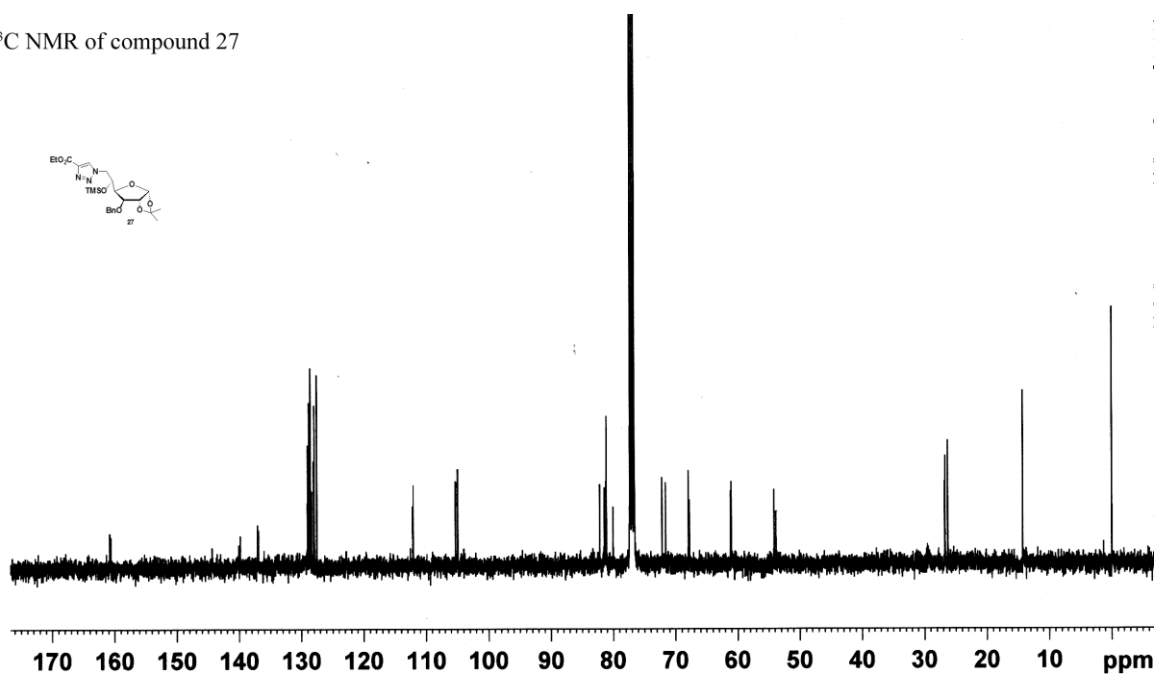

$^1\text{H}$  NMR of compound 28

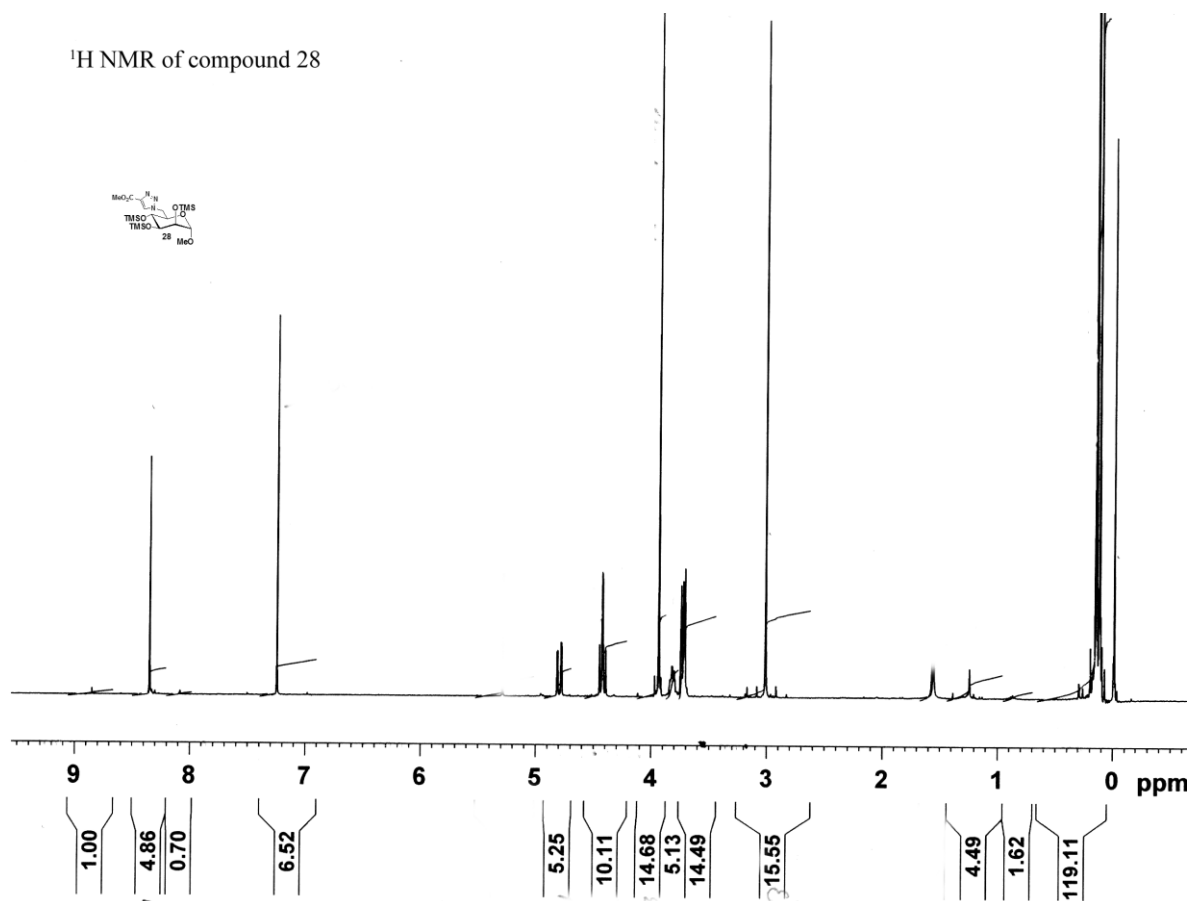

$^{13}\text{C}$  NMR of compound 28

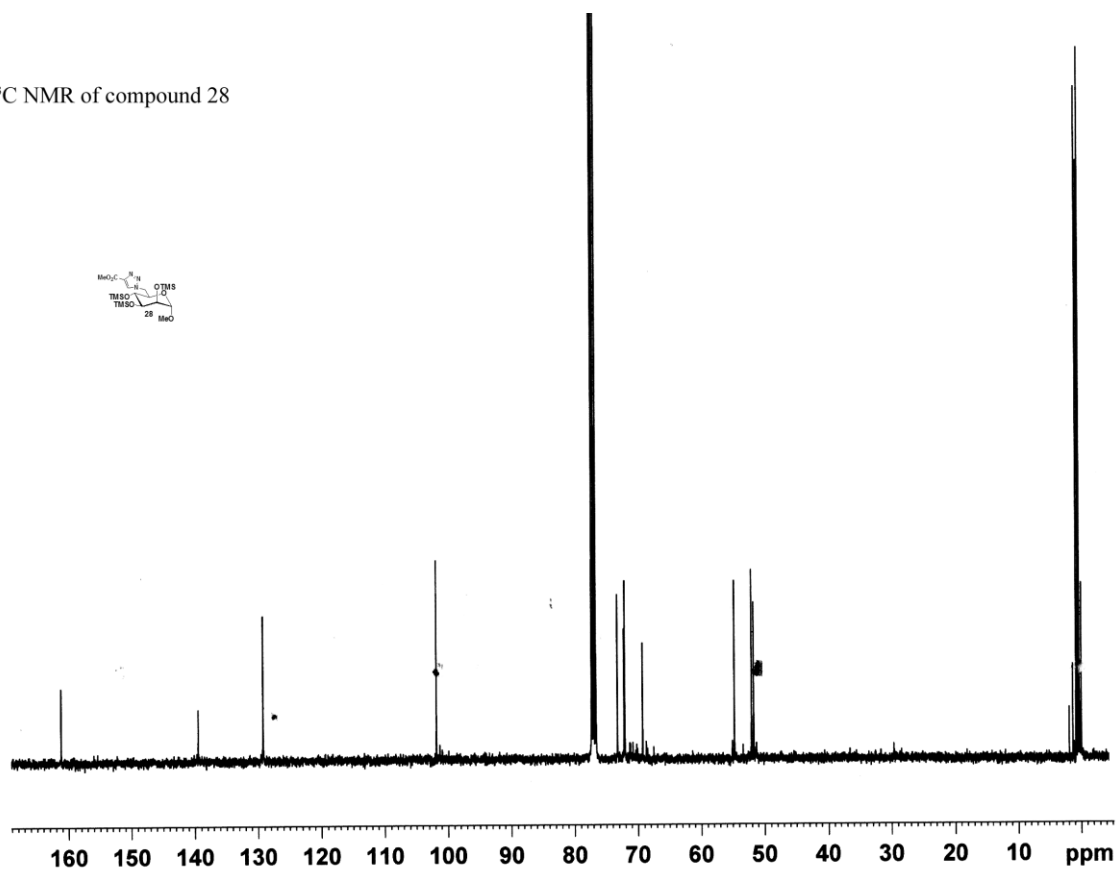

Supplement: c2ob26324f.pdf [file c2ob26324f.pdf]
