# Supplementary material for: Regioselective azidotrimethylsilylation of carbohydrates and applications thereof
Source: Royal Society of Chemistry journal article supplement (doi:10.1039/c2ob26324f), 2012-01-01

### **Supporting information**

#### **Regioselective azidotrimethylsilylation of carbohydrates and applications thereof**

Mallikharjuna Rao L,<sup>a</sup> Syed Khalid Yousuf,<sup>a</sup> Debaraj Mukherjee<sup>a</sup>, Subhash Chandra Taneja<sup>a\*</sup>

*Org. Biomol. Chem.*, 2012, 10, 9090-9098 (DOI: 10.1039/C2OB26324F) Paper

<sup>1</sup>H NMR of compound 1a

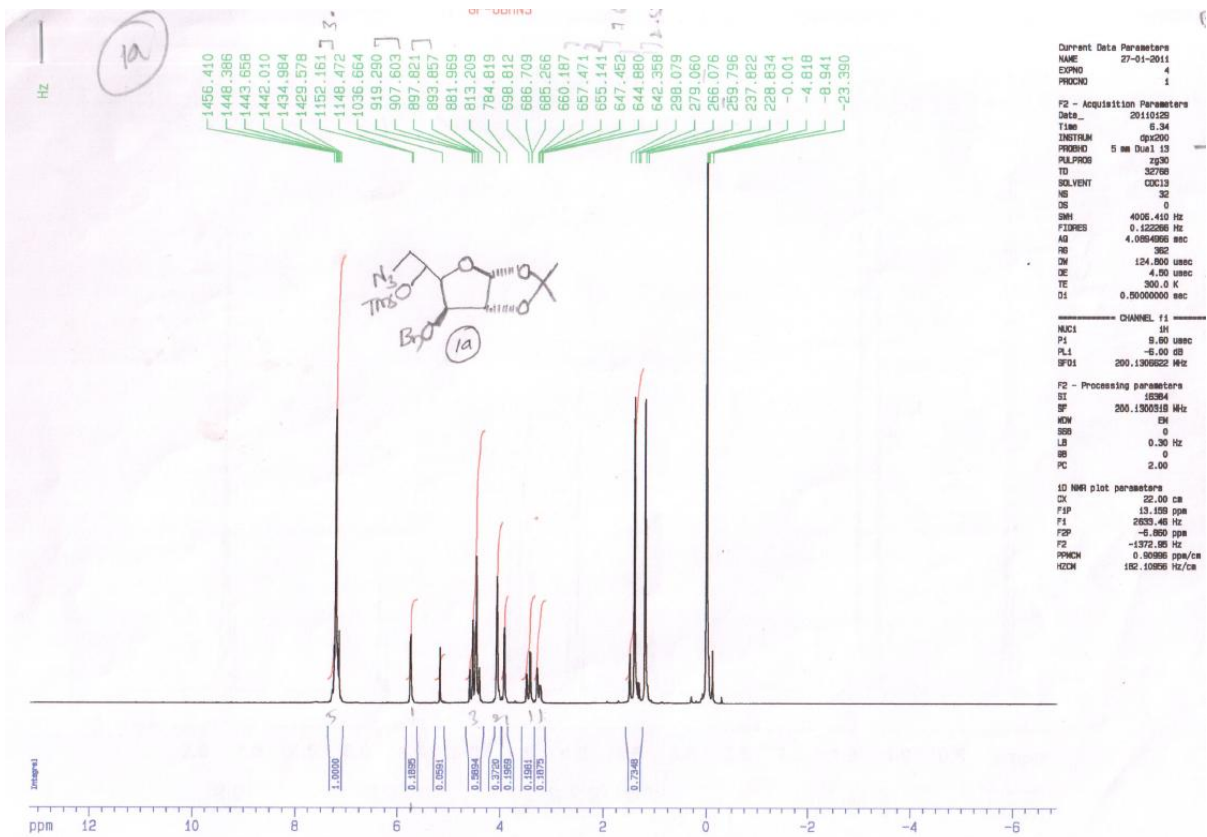

<sup>13</sup>C NMR of compound 1a

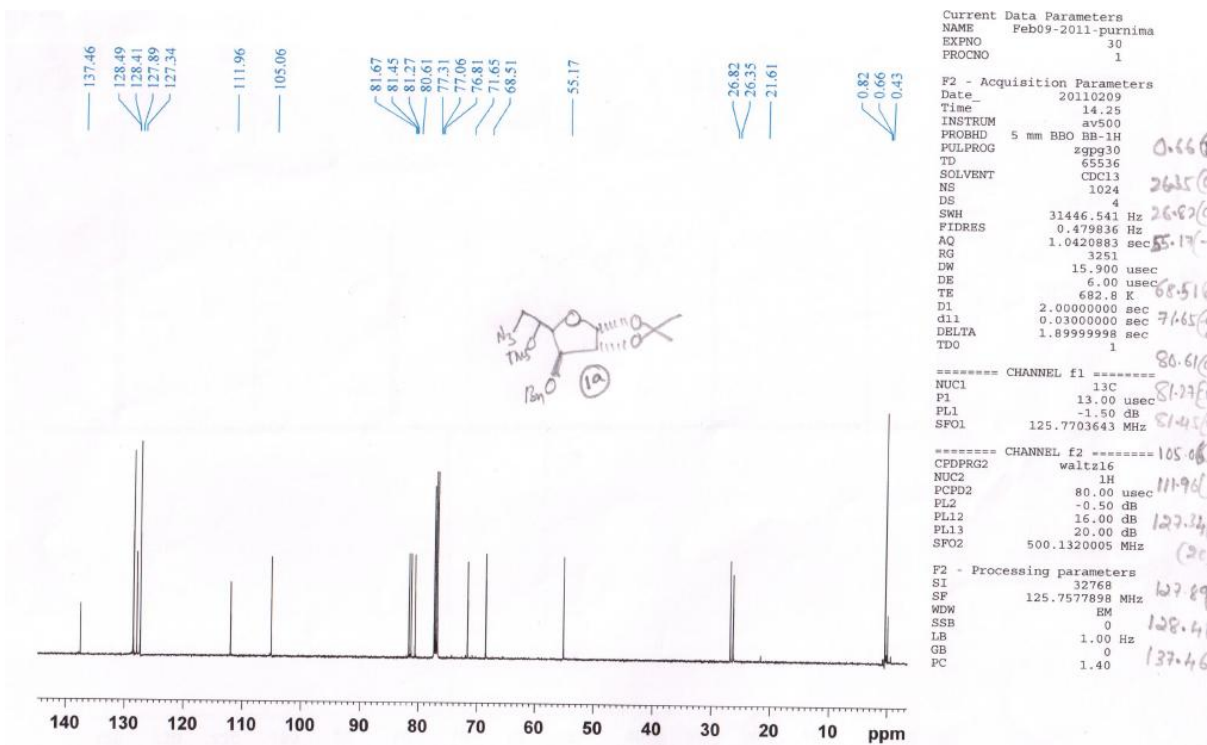

$^{13}\text{C}$  NMR of compound 2a

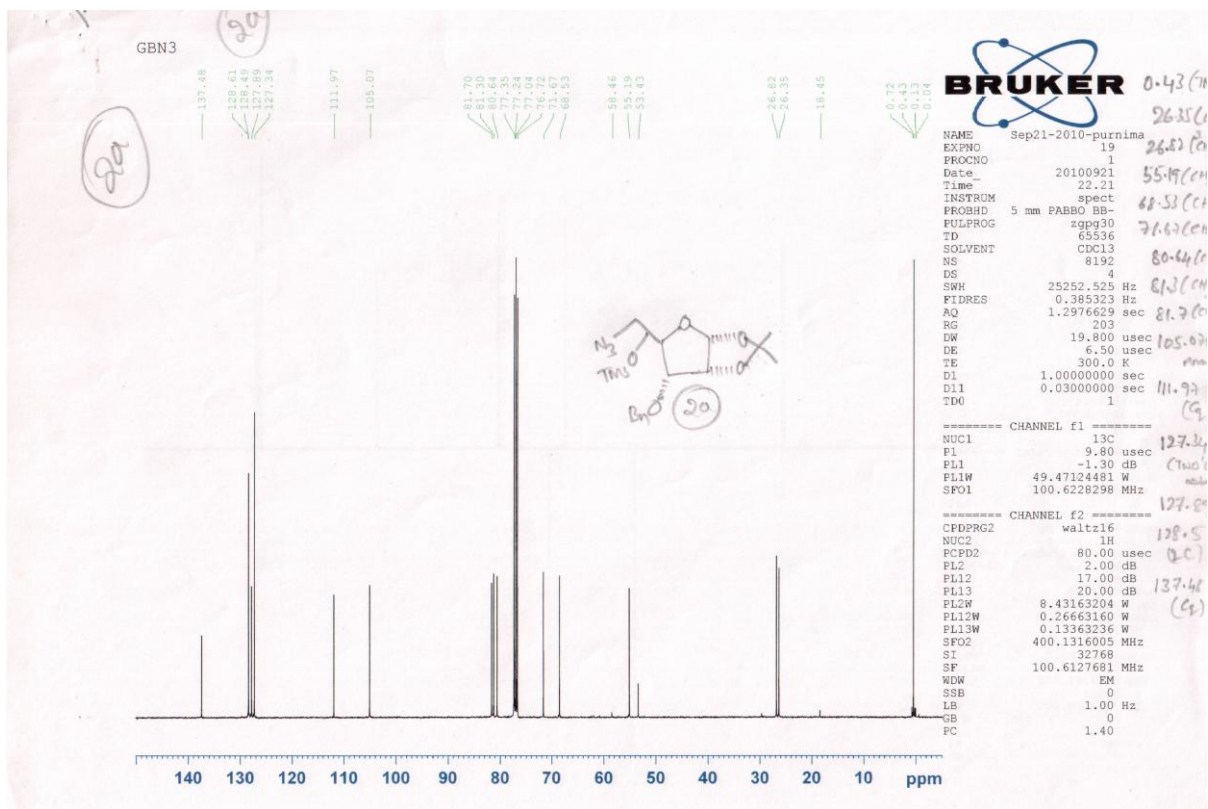

<sup>1</sup>H NMR of compound 3a

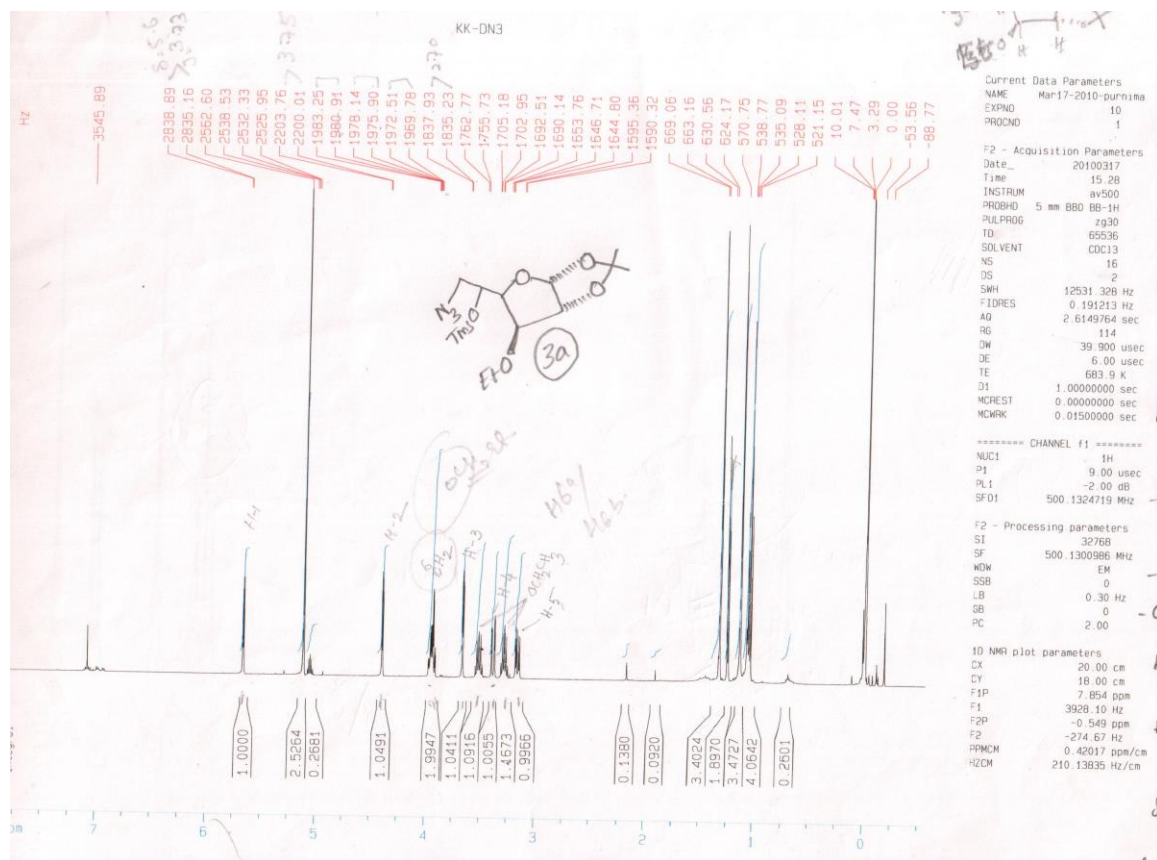

<sup>13</sup>C NMR of compound 3a

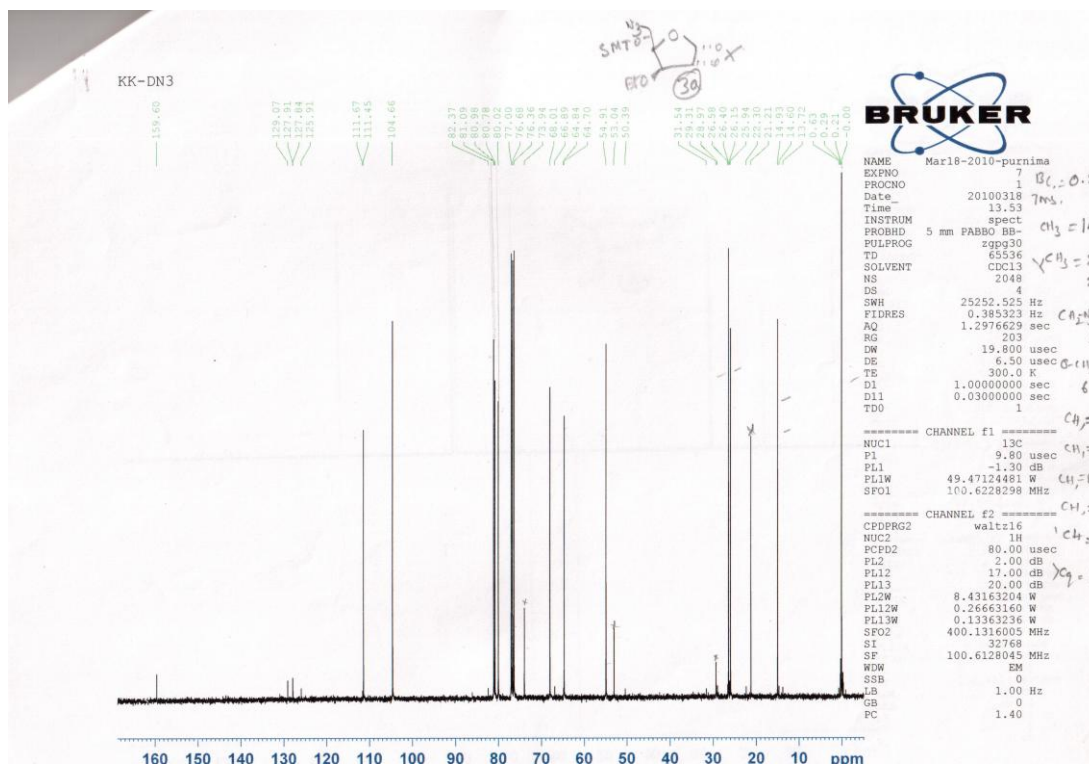

<sup>1</sup>H NMR of compound 4a

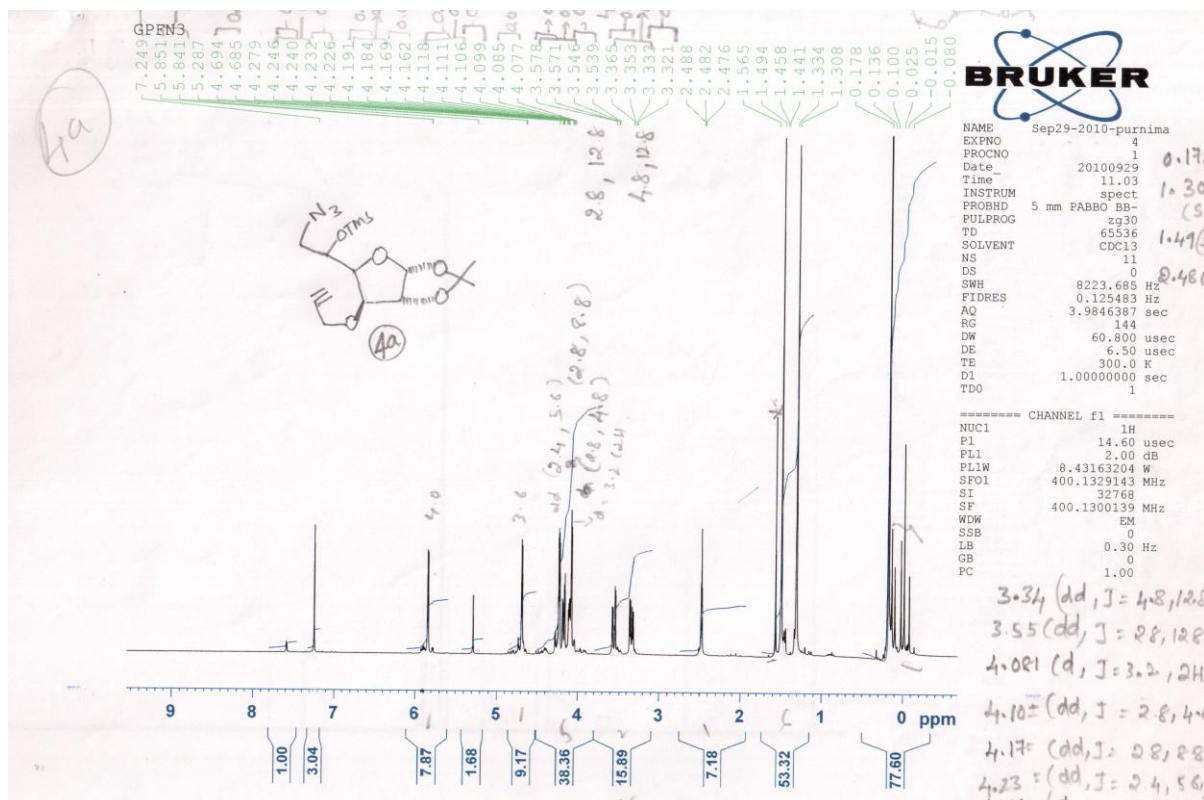

<sup>13</sup>C NMR of compound 4a

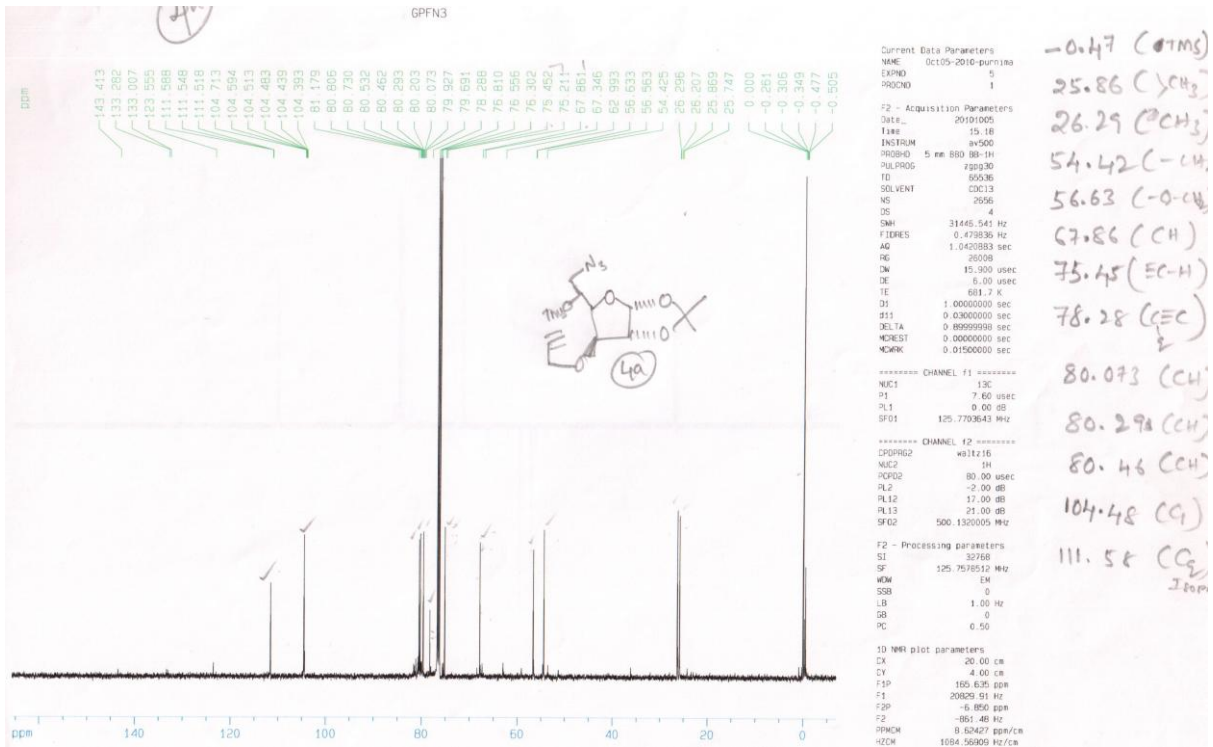

1H NMR of compound 5a

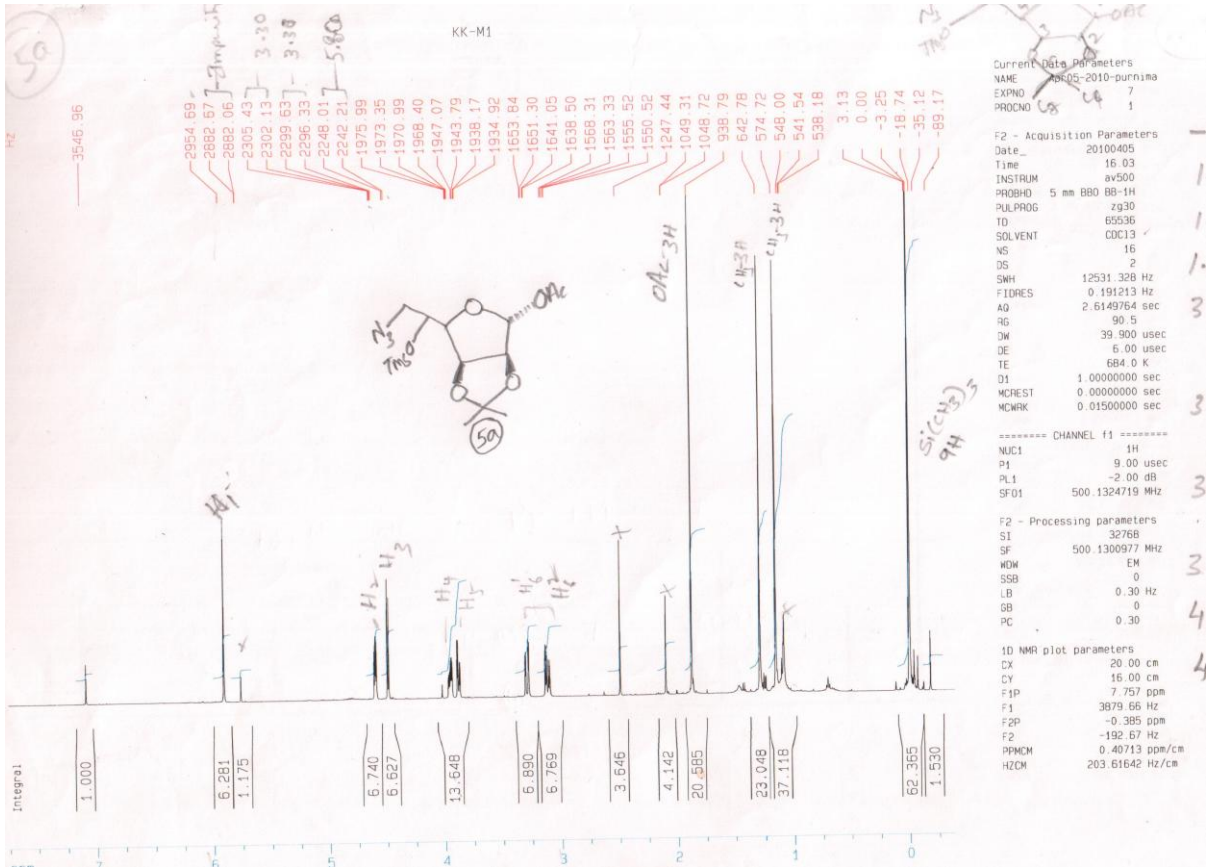

<sup>13</sup>C NMR of compound 5a

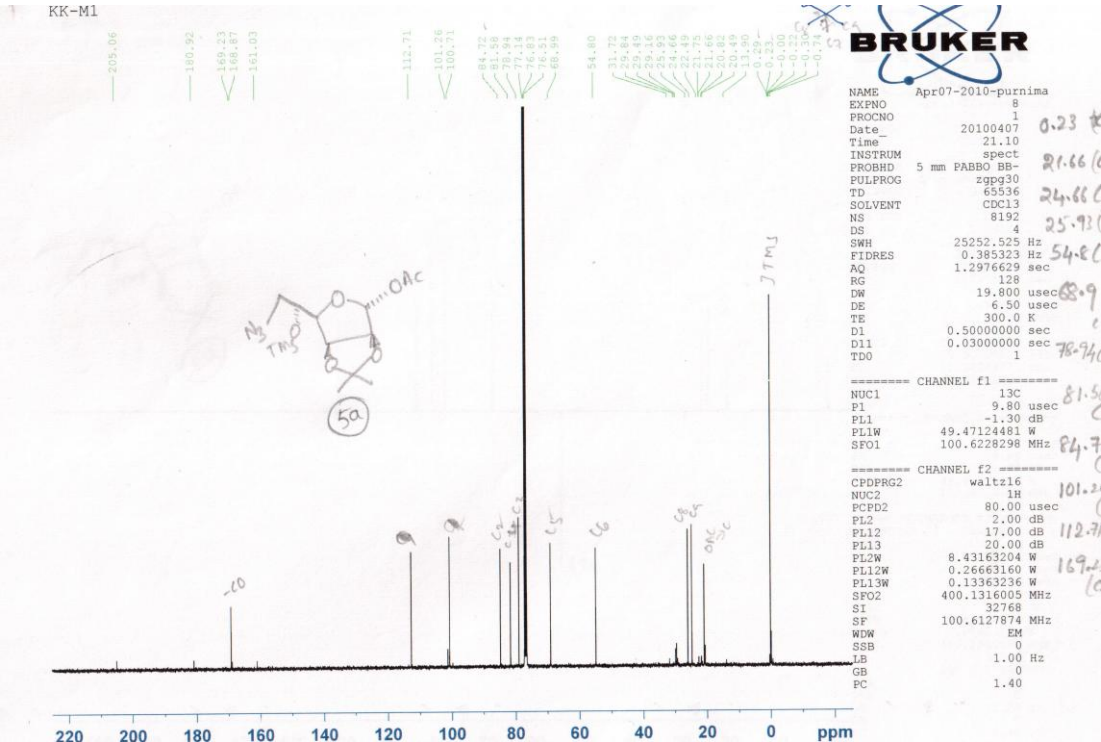

<sup>1</sup>H NMR of compound 6a

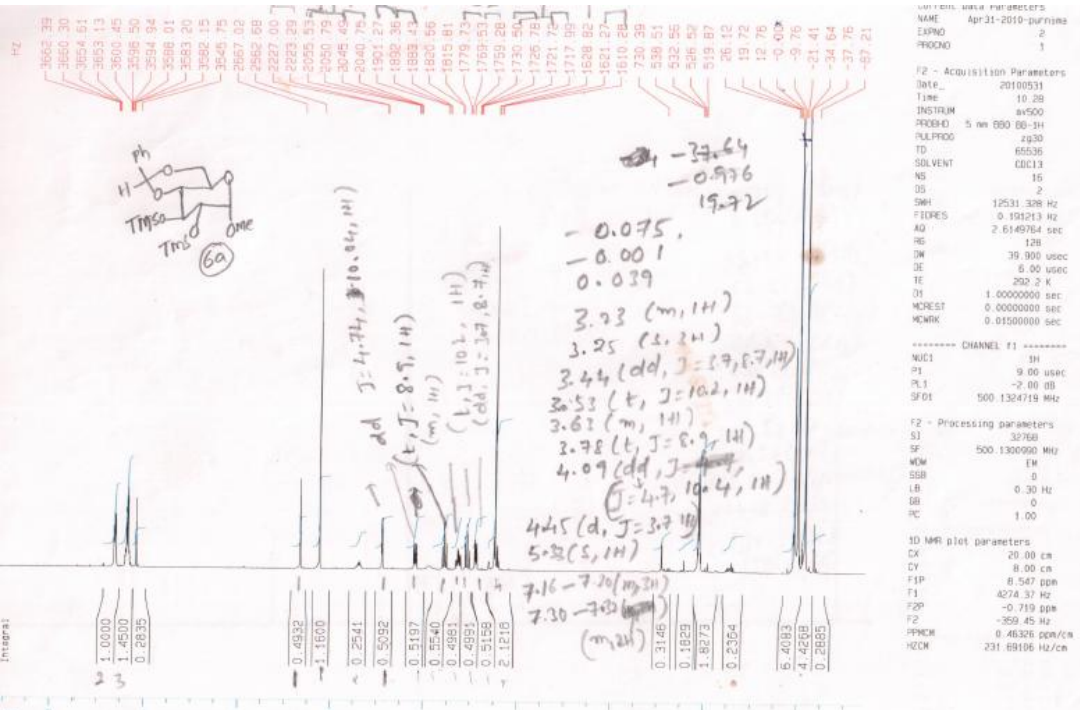

<sup>1</sup>H NMR of compound 7a

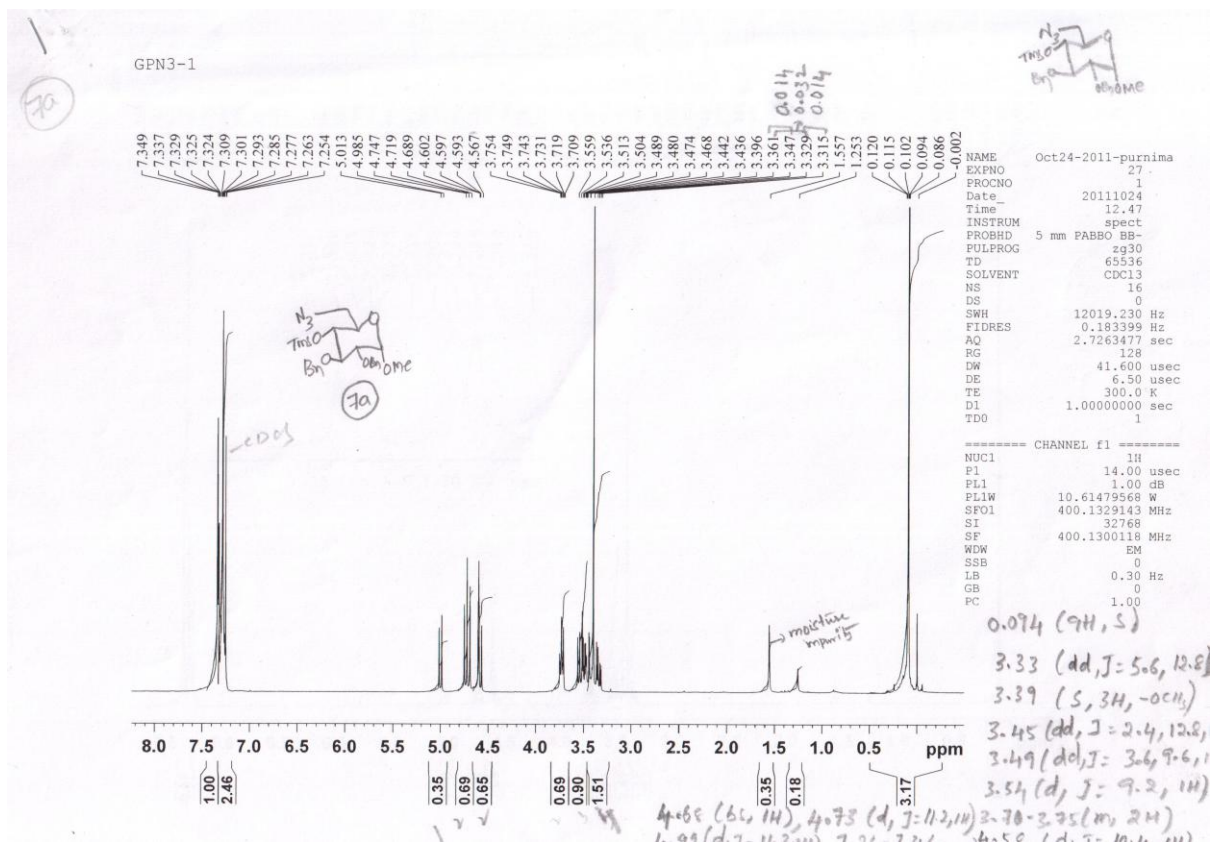 $^{13}\text{C}$  NMR of compound 7a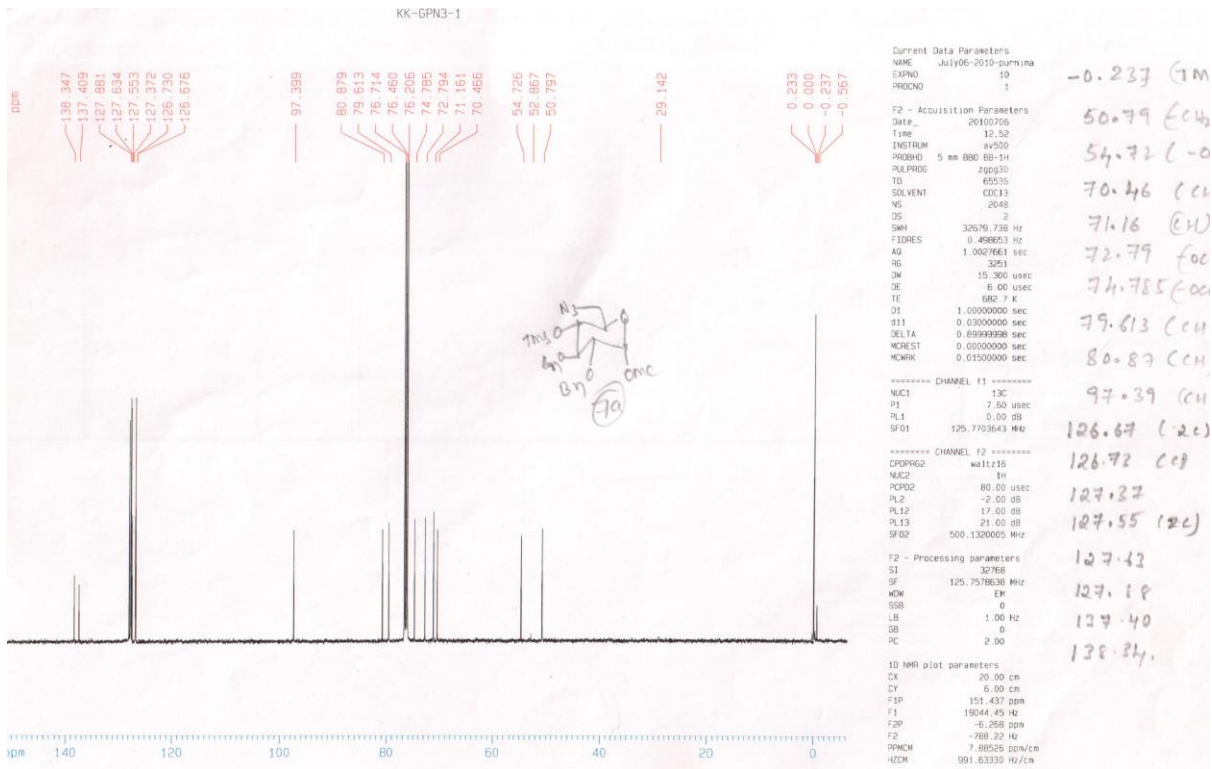<sup>1</sup>H NMR of compound 8a

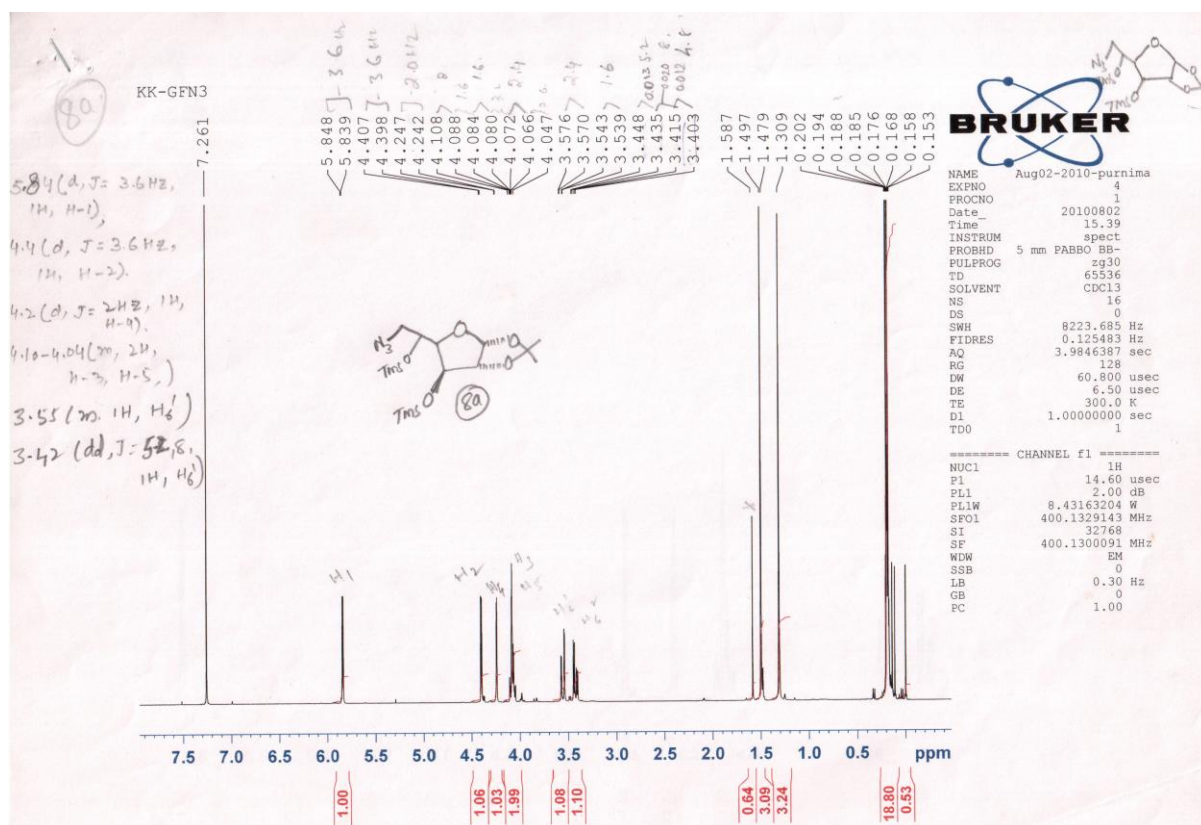

<sup>13</sup>C NMR of compound 8a

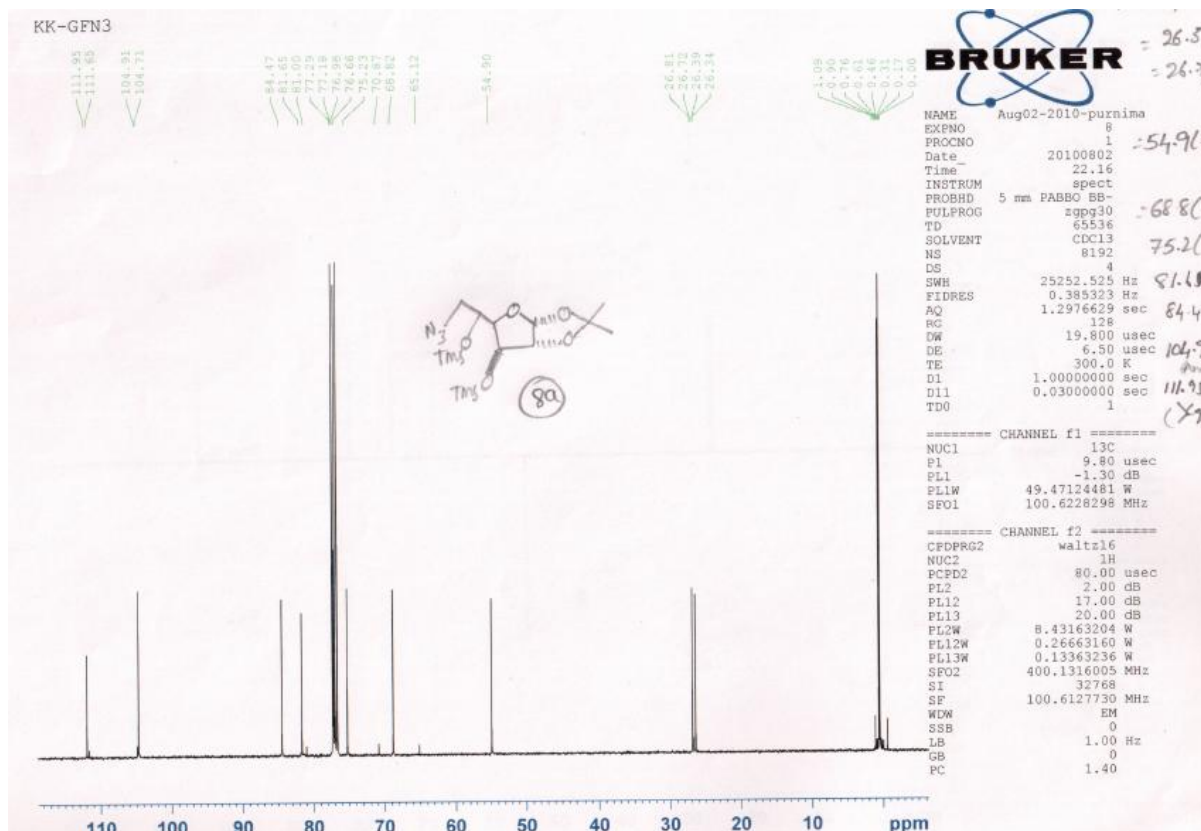

<sup>1</sup>H NMR of compound 9a

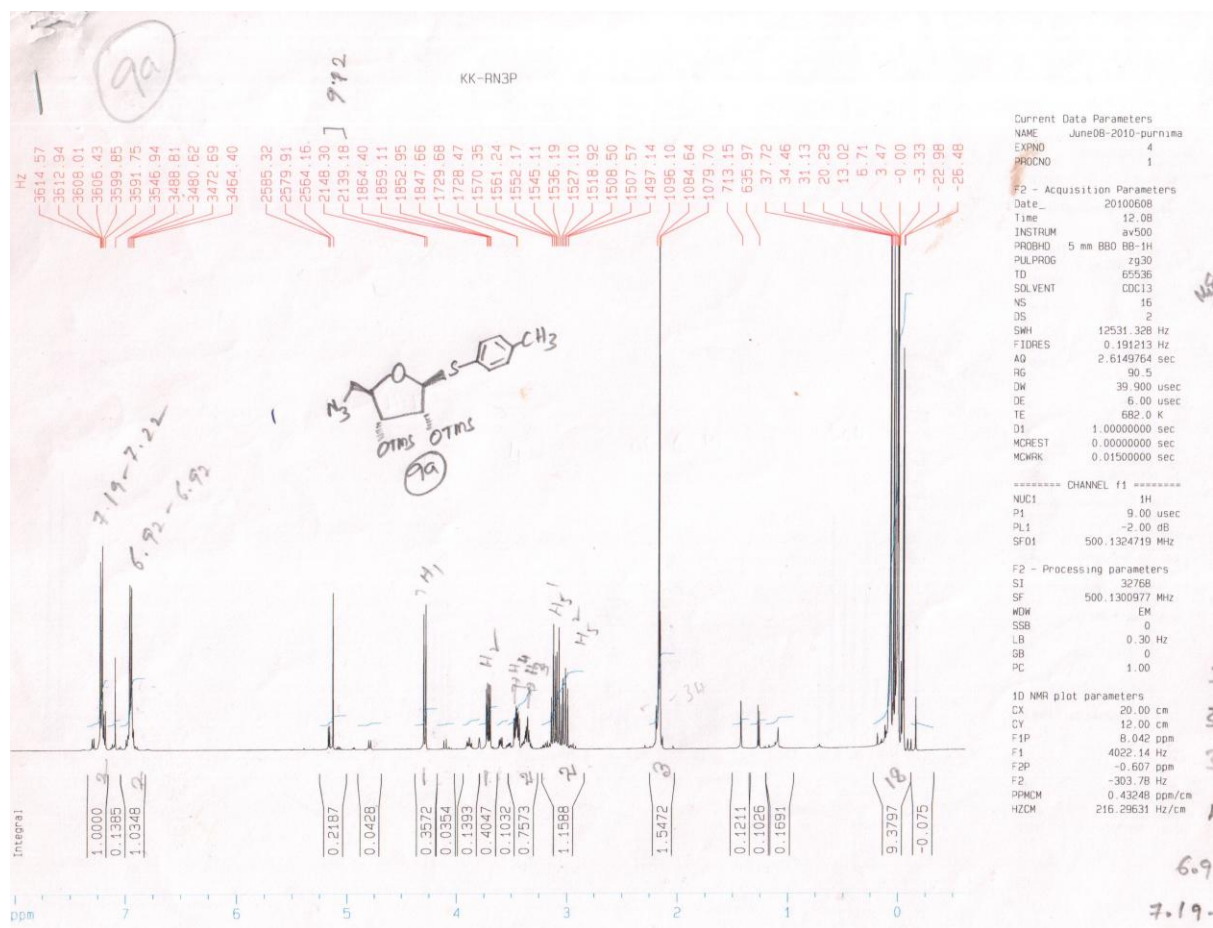

<sup>13</sup>C NMR of compound 9a

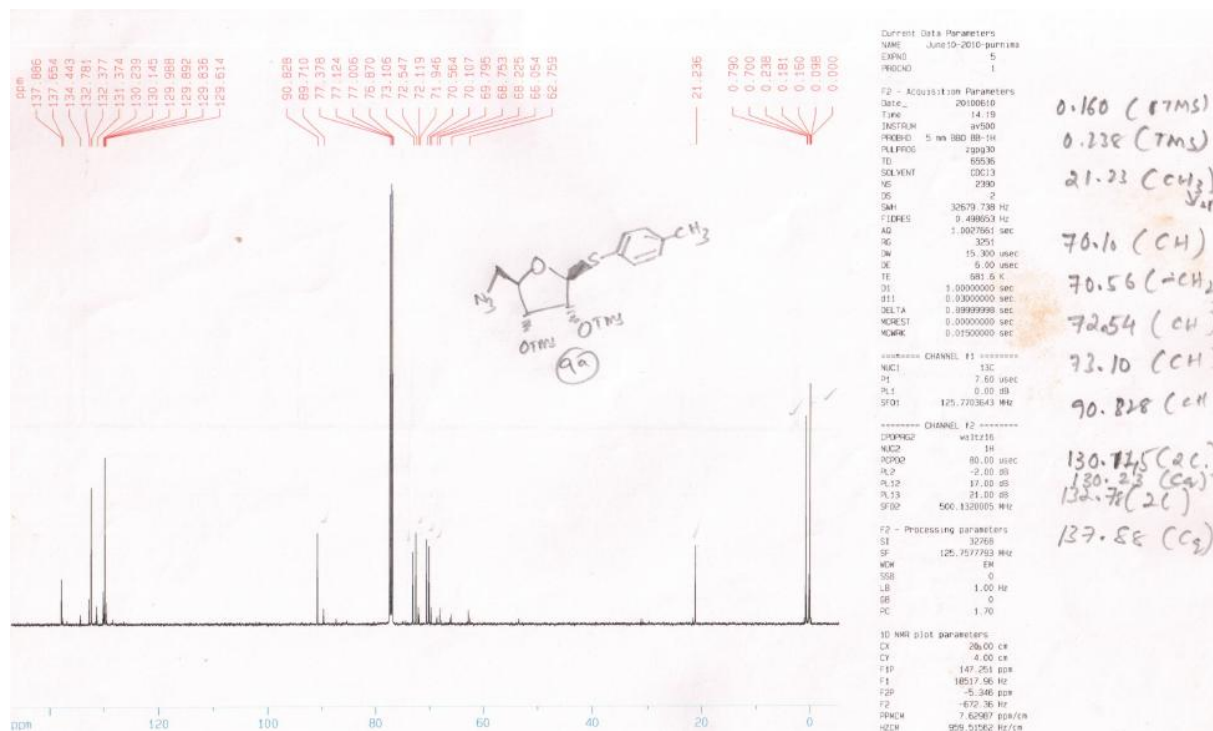

<sup>1</sup>H NMR of compound 10a

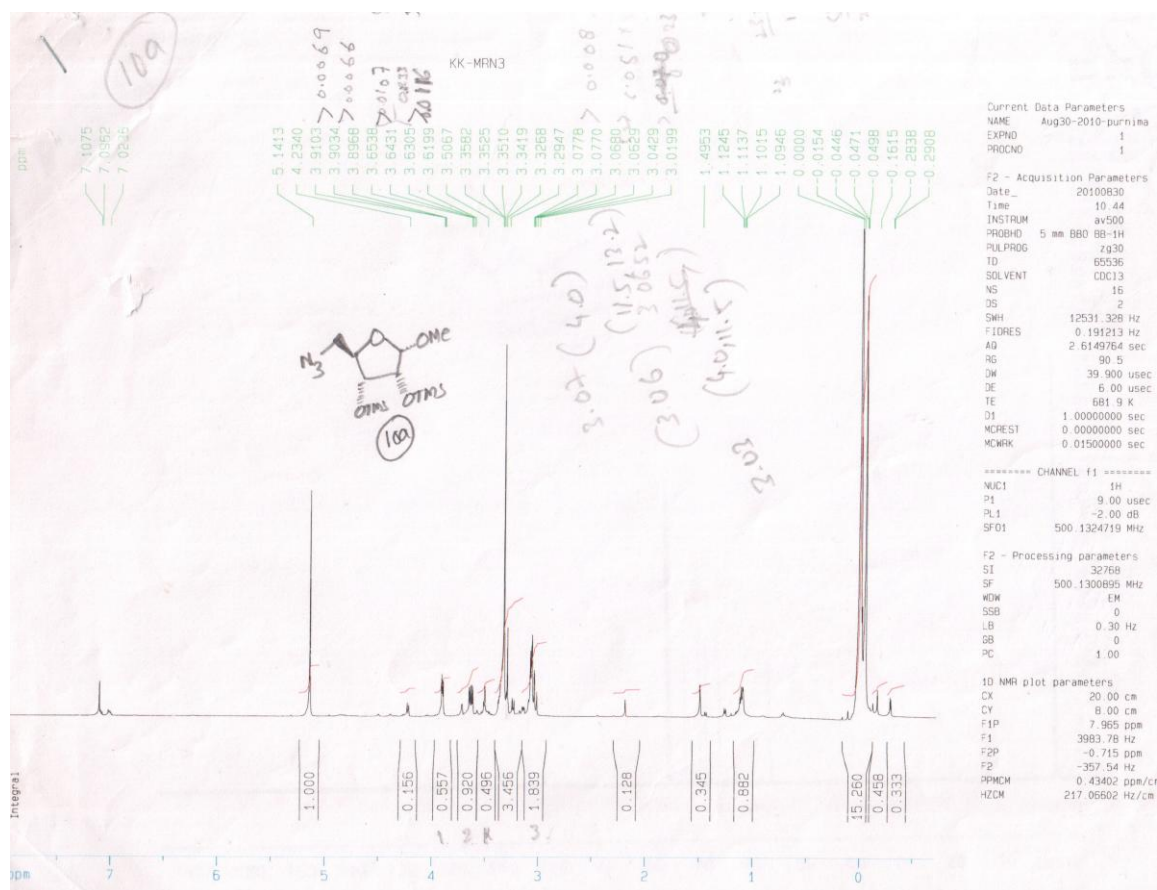

<sup>13</sup>C NMR of compound 10a

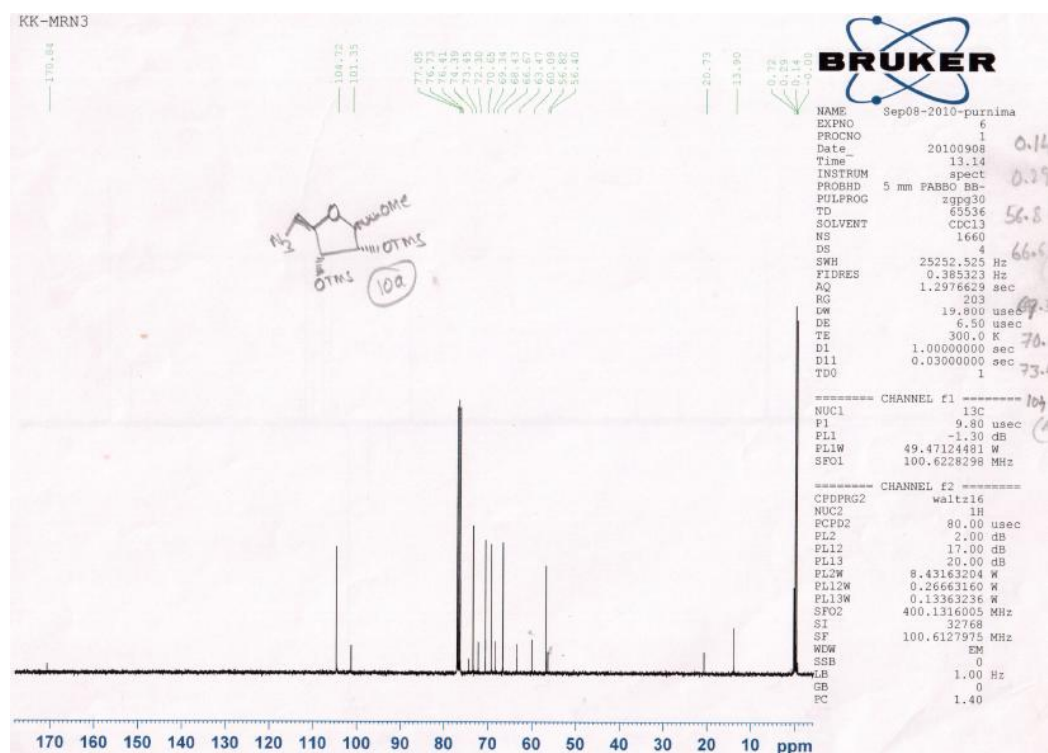

<sup>1</sup>H NMR of compound 11a

11a

7.091

4.472  
4.463  
3.589  
3.567  
3.554  
3.546  
3.531  
3.524  
3.515  
3.509  
3.340  
3.331  
3.317  
3.308  
3.305  
3.299  
3.272  
3.266  
3.257  
3.233  
3.217  
3.197  
3.182  
3.164  
3.150  
1.394

0.145  
0.141  
0.126  
0.071  
0.029  
-0.014  
-0.027  
-0.171

NAME  
EXPNO  
PROCNO  
Date\_   
Time\_   
INSTR  
PROBHD  
PULPROG  
TD  
SOLVENT  
NS  
DS  
SWH  
FIDRES  
AQ  
RG  
DW  
DE  
TE  
D1  
TDO

NUC1  
P1  
PL1  
PL1W  
SF01  
SI  
SF  
WDW  
SSB  
LB  
GB  
PC

11a

3.18  
3.2  
3.21  
3.22  
3.23  
3.24  
3.25  
3.26  
3.27  
3.28  
3.29  
3.3  
3.31  
3.32  
3.33  
3.34  
3.35  
3.36  
3.37  
3.38  
3.39  
3.4  
3.41  
3.42  
3.43  
3.44  
3.45  
3.46  
3.47  
3.48  
3.49  
3.5  
3.51  
3.52  
3.53  
3.54  
3.55  
3.56  
3.57  
3.58  
3.59  
3.6  
3.61  
3.62  
3.63  
3.64  
3.65  
3.66  
3.67  
3.68  
3.69  
3.7  
3.71  
3.72  
3.73  
3.74  
3.75  
3.76  
3.77  
3.78  
3.79  
3.8  
3.81  
3.82  
3.83  
3.84  
3.85  
3.86  
3.87  
3.88  
3.89  
3.9  
3.91  
3.92  
3.93  
3.94  
3.95  
3.96  
3.97  
3.98  
3.99  
4  
4.01  
4.02  
4.03  
4.04  
4.05  
4.06  
4.07  
4.08  
4.09  
4.1  
4.11  
4.12  
4.13  
4.14  
4.15  
4.16  
4.17  
4.18  
4.19  
4.2  
4.21  
4.22  
4.23  
4.24  
4.25  
4.26  
4.27  
4.28  
4.29  
4.3  
4.31  
4.32  
4.33  
4.34  
4.35  
4.36  
4.37  
4.38  
4.39  
4.4  
4.41  
4.42  
4.43  
4.44  
4.45  
4.46  
4.47  
4.48  
4.49  
4.5  
4.51  
4.52  
4.53  
4.54  
4.55  
4.56  
4.57  
4.58  
4.59  
4.6  
4.61  
4.62  
4.63  
4.64  
4.65  
4.66  
4.67  
4.68  
4.69  
4.7  
4.71  
4.72  
4.73  
4.74  
4.75  
4.76  
4.77  
4.78  
4.79  
4.8  
4.81  
4.82  
4.83  
4.84  
4.85  
4.86  
4.87  
4.88  
4.89  
4.9  
4.91  
4.92  
4.93  
4.94  
4.95  
4.96  
4.97  
4.98  
4.99  
5  
5.01  
5.02  
5.03  
5.04  
5.05  
5.06  
5.07  
5.08  
5.09  
5.1  
5.11  
5.12  
5.13  
5.14  
5.15  
5.16  
5.17  
5.18  
5.19  
5.2  
5.21  
5.22  
5.23  
5.24  
5.25  
5.26  
5.27  
5.28  
5.29  
5.3  
5.31  
5.32  
5.33  
5.34  
5.35  
5.36  
5.37  
5.38  
5.39  
5.4  
5.41  
5.42  
5.43  
5.44  
5.45  
5.46  
5.47  
5.48  
5.49  
5.5  
5.51  
5.52  
5.53  
5.54  
5.55  
5.56  
5.57  
5.58  
5.59  
5.6  
5.61  
5.62  
5.63  
5.64  
5.65  
5.66  
5.67  
5.68  
5.69  
5.7  
5.71  
5.72  
5.73  
5.74  
5.75  
5.76  
5.77  
5.78  
5.79  
5.8  
5.81  
5.82  
5.83  
5.84  
5.85  
5.86  
5.87  
5.88  
5.89  
5.9  
5.91  
5.92  
5.93  
5.94  
5.95  
5.96  
5.97  
5.98  
5.99  
6  
6.01  
6.02  
6.03  
6.04  
6.05  
6.06  
6.07  
6.08  
6.09  
6.1  
6.11  
6.12  
6.13  
6.14  
6.15  
6.16  
6.17  
6.18  
6.19  
6.2  
6.21  
6.22  
6.23  
6.24  
6.25  
6.26  
6.27  
6.28  
6.29  
6.3  
6.31  
6.32  
6.33  
6.34  
6.35  
6.36  
6.37  
6.38  
6.39  
6.4  
6.41  
6.42  
6.43  
6.44  
6.45  
6.46  
6.47  
6.48  
6.49  
6.5  
6.51  
6.52  
6.53  
6.54  
6.55  
6.56  
6.57  
6.58  
6.59  
6.6  
6.61  
6.62  
6.63  
6.64  
6.65  
6.66  
6.67  
6.68  
6.69  
6.7  
6.71  
6.72  
6.73  
6.74  
6.75  
6.76  
6.77  
6.78  
6.79  
6.8  
6.81  
6.82  
6.83  
6.84  
6.85  
6.86  
6.87  
6.88  
6.89  
6.9  
6.91  
6.92  
6.93  
6.94  
6.95  
6.96  
6.97  
6.98  
6.99  
7  
7.01  
7.02  
7.03  
7.04  
7.05  
7.06  
7.07  
7.08  
7.09  
7.1  
7.11  
7.12  
7.13  
7.14  
7.15  
7.16  
7.17  
7.18  
7.19  
7.2  
7.21  
7.22  
7.23  
7.24  
7.25  
7.26  
7.27  
7.28  
7.29  
7.3  
7.31  
7.32  
7.33  
7.34  
7.35  
7.36  
7.37  
7.38  
7.39  
7.4  
7.41  
7.42  
7.43  
7.44  
7.45  
7.46  
7.47  
7.48  
7.49  
7.5  
7.51  
7.52  
7.53  
7.54  
7.55  
7.56  
7.57  
7.58  
7.59  
7.6  
7.61  
7.62  
7.63  
7.64  
7.65  
7.66  
7.67  
7.68  
7.69  
7.7  
7.71  
7.72  
7.73  
7.74  
7.75  
7.76  
7.77  
7.78  
7.79  
7.8  
7.81  
7.82  
7.83  
7.84  
7.85  
7.86  
7.87  
7.88  
7.89  
7.9  
7.91  
7.92  
7.93  
7.94  
7.95  
7.96  
7.97  
7.98  
7.99  
8  
8.01  
8.02  
8.03  
8.04  
8.05  
8.06  
8.07  
8.08  
8.09  
8.1  
8.11  
8.12  
8.13  
8.14  
8.15  
8.16  
8.17  
8.18  
8.19  
8.2  
8.21  
8.22  
8.23  
8.24  
8.25  
8.26  
8.27  
8.28  
8.29  
8.3  
8.31  
8.32  
8.33  
8.34  
8.35  
8.36  
8.37  
8.38  
8.39  
8.4  
8.41  
8.42  
8.43  
8.44  
8.45  
8.46  
8.47  
8.48  
8.49  
8.5  
8.51  
8.52  
8.53  
8.54  
8.55  
8.56  
8.57  
8.58  
8.59  
8.6  
8.61  
8.62  
8.63  
8.64  
8.65  
8.66  
8.67  
8.68  
8.69  
8.7  
8.71  
8.72  
8.73  
8.74  
8.75  
8.76  
8.77  
8.78  
8.79  
8.8  
8.81  
8.82  
8.83  
8.84  
8.85  
8.86  
8.87  
8.88  
8.89  
8.9  
8.91  
8.92  
8.93  
8.94  
8.95  
8.96  
8.97  
8.98  
8.99  
9  
9.01  
9.02  
9.03  
9.04  
9.05  
9.06  
9.07  
9.08  
9.09  
9.1  
9.11  
9.12  
9.13  
9.14  
9.15  
9.16  
9.17  
9.18  
9.19  
9.2  
9.21  
9.22  
9.23  
9.24  
9.25  
9.26  
9.27  
9.28  
9.29  
9.3  
9.31  
9.32  
9.33  
9.34  
9.35  
9.36  
9.37  
9.38  
9.39  
9.4  
9.41  
9.42  
9.43  
9.44  
9.45

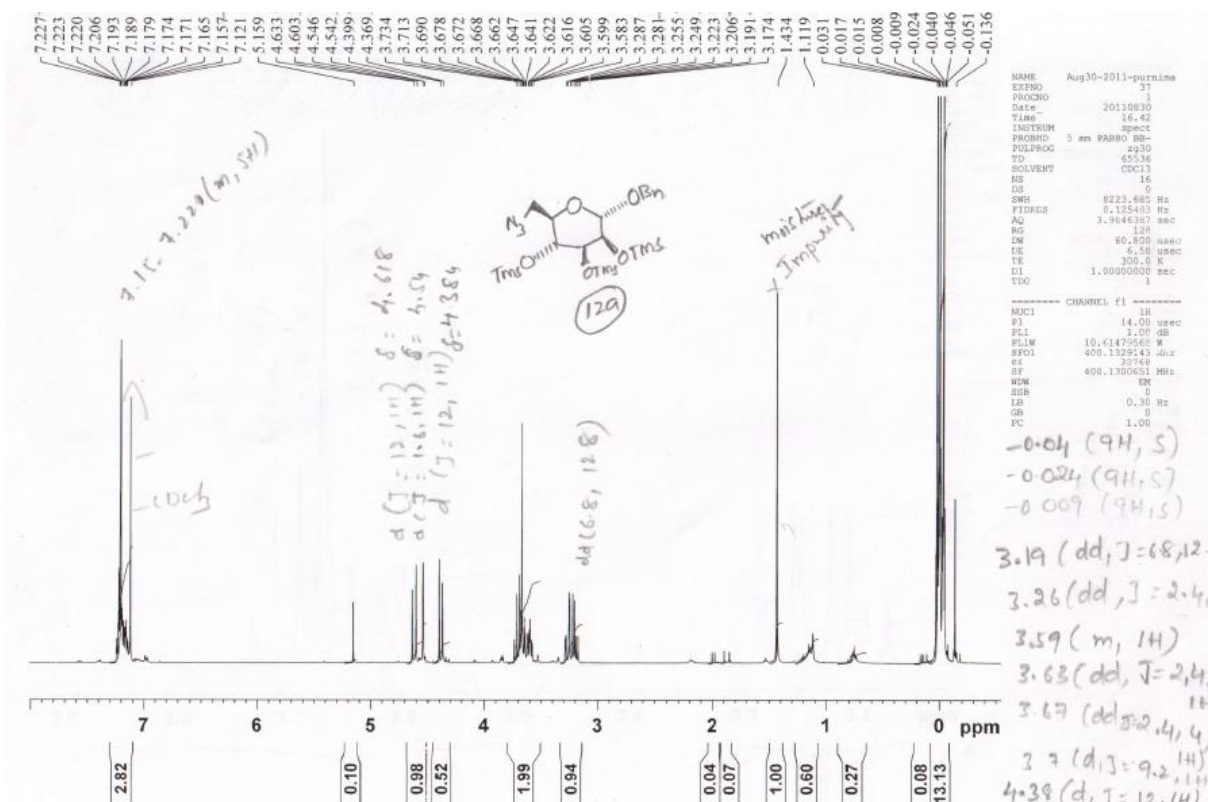

<sup>13</sup>C NMR of compound 12a

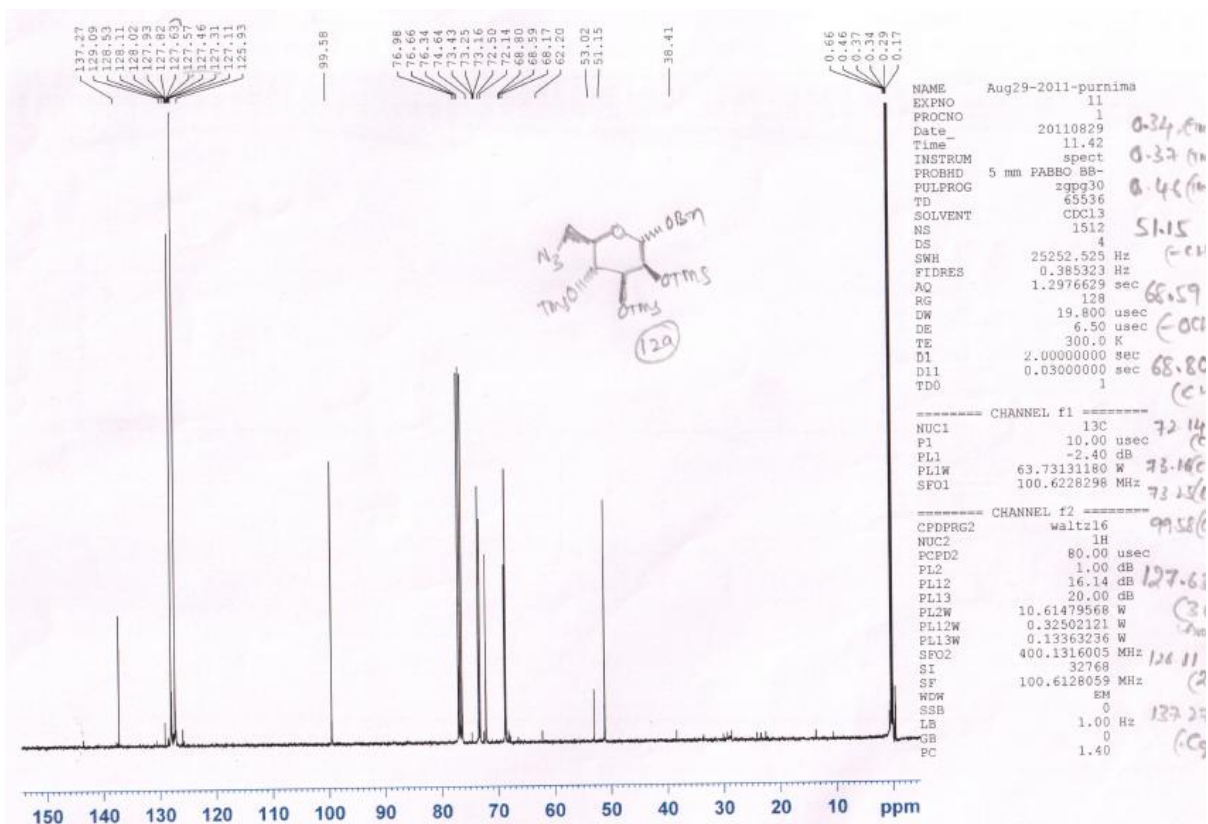

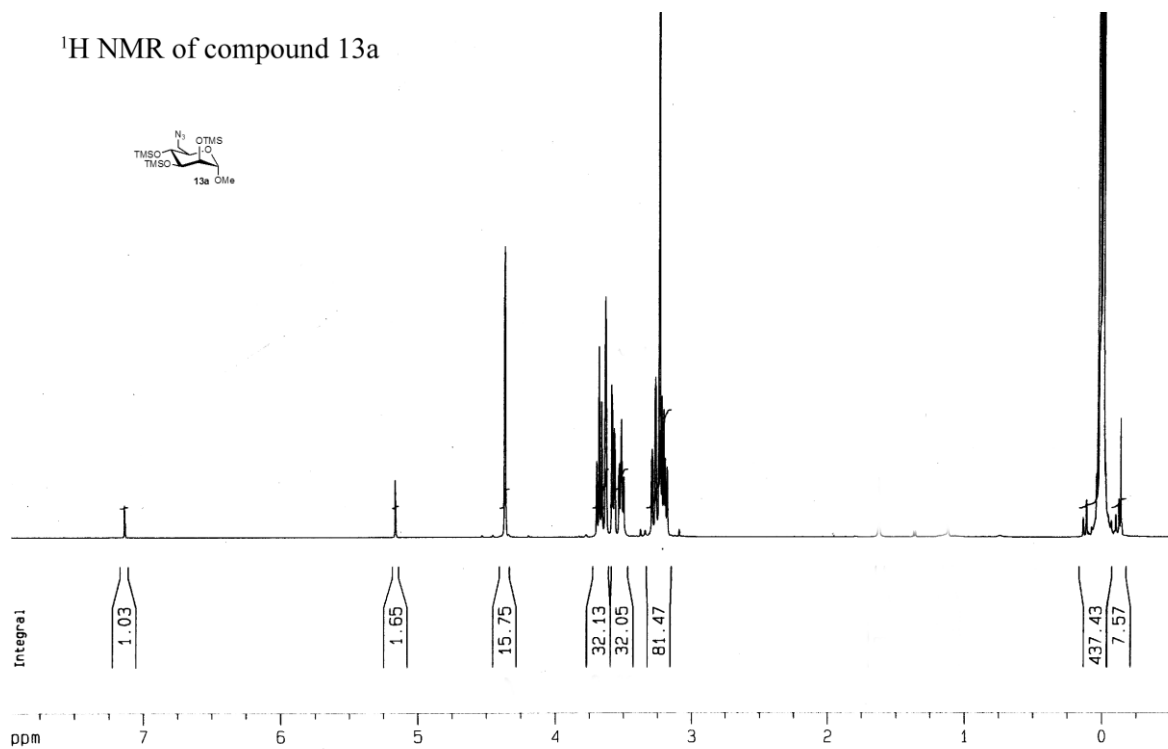

<sup>13</sup>C NMR of compound 13a

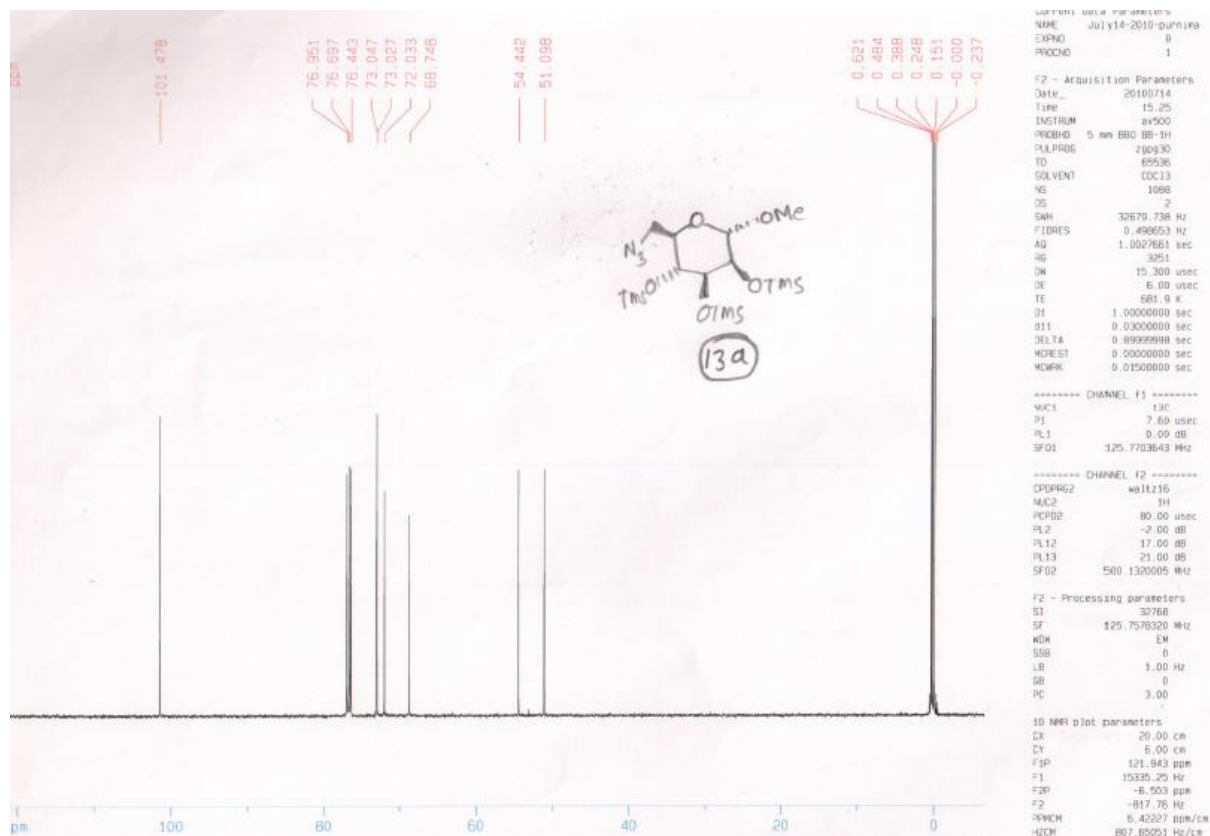

<sup>1</sup>H NMR of compound 14a

<sup>1</sup>H NMR of compound 15a

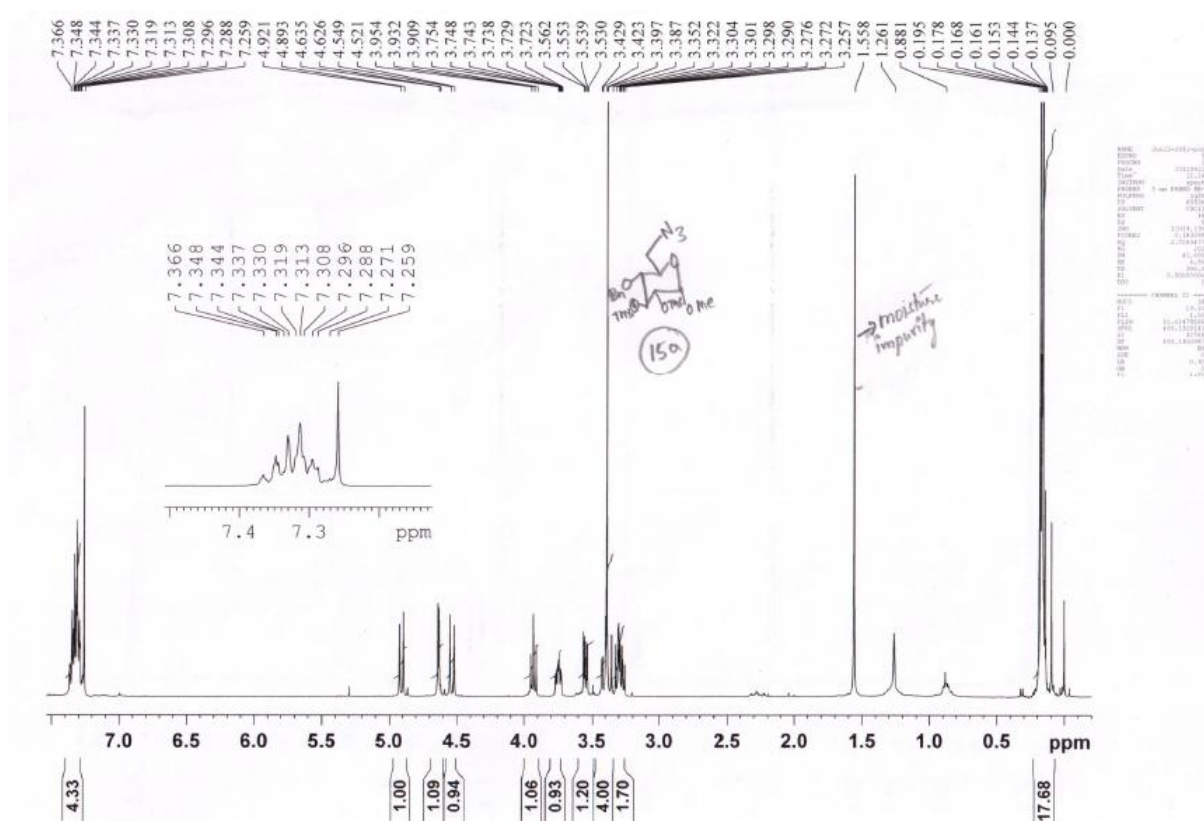

<sup>13</sup>C NMR of compound 15a

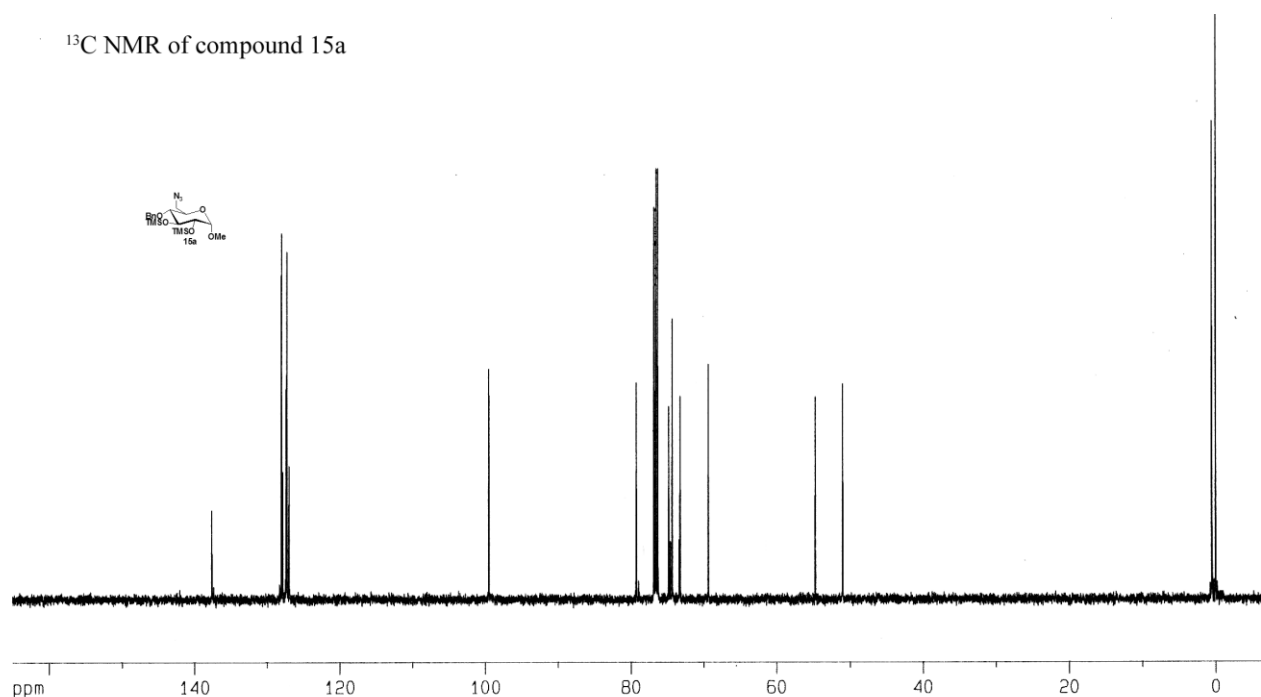

<sup>1</sup>H NMR of compound 16a

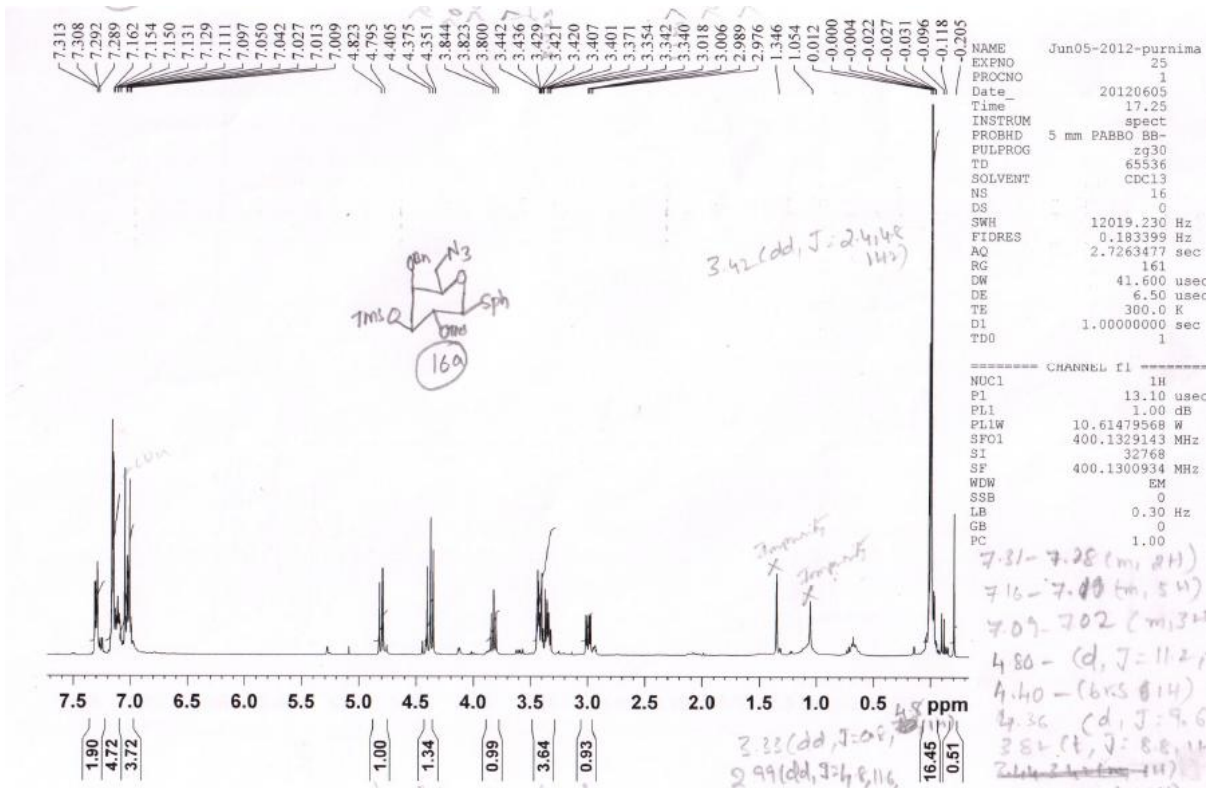

<sup>13</sup>C NMR of compound 16a

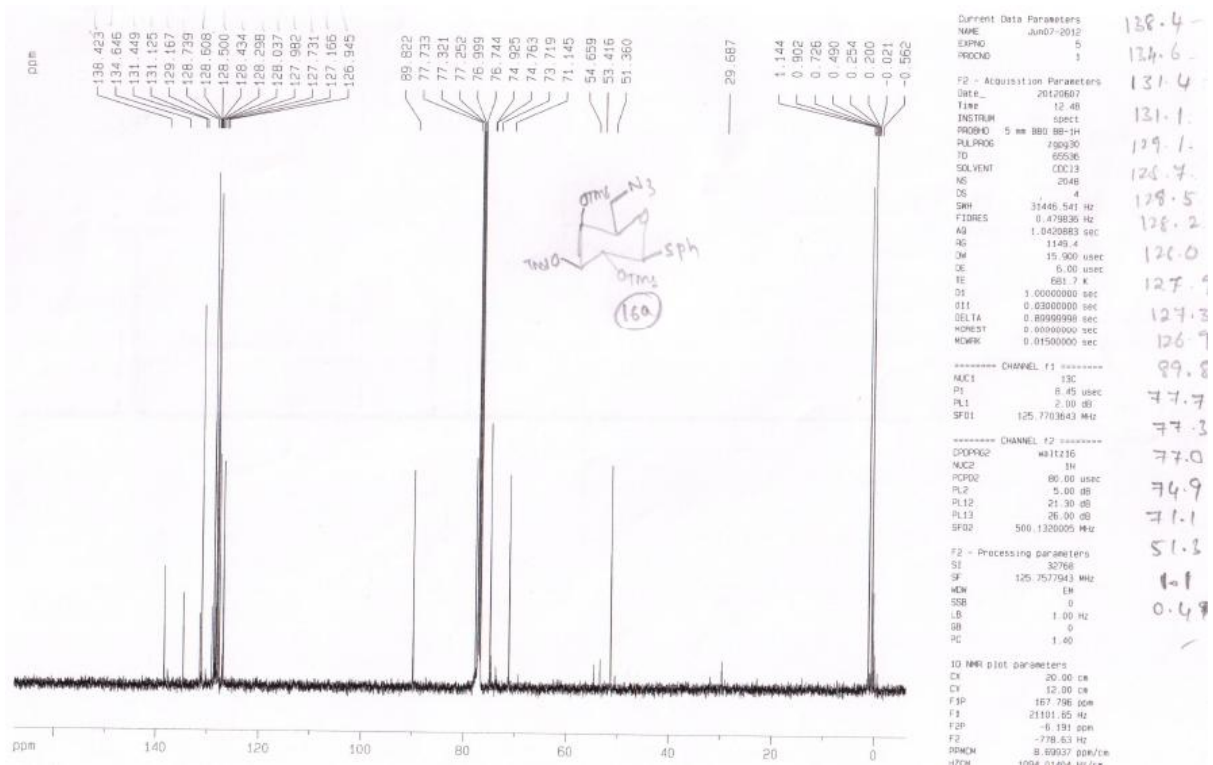

<sup>1</sup>H NMR of compound 17a

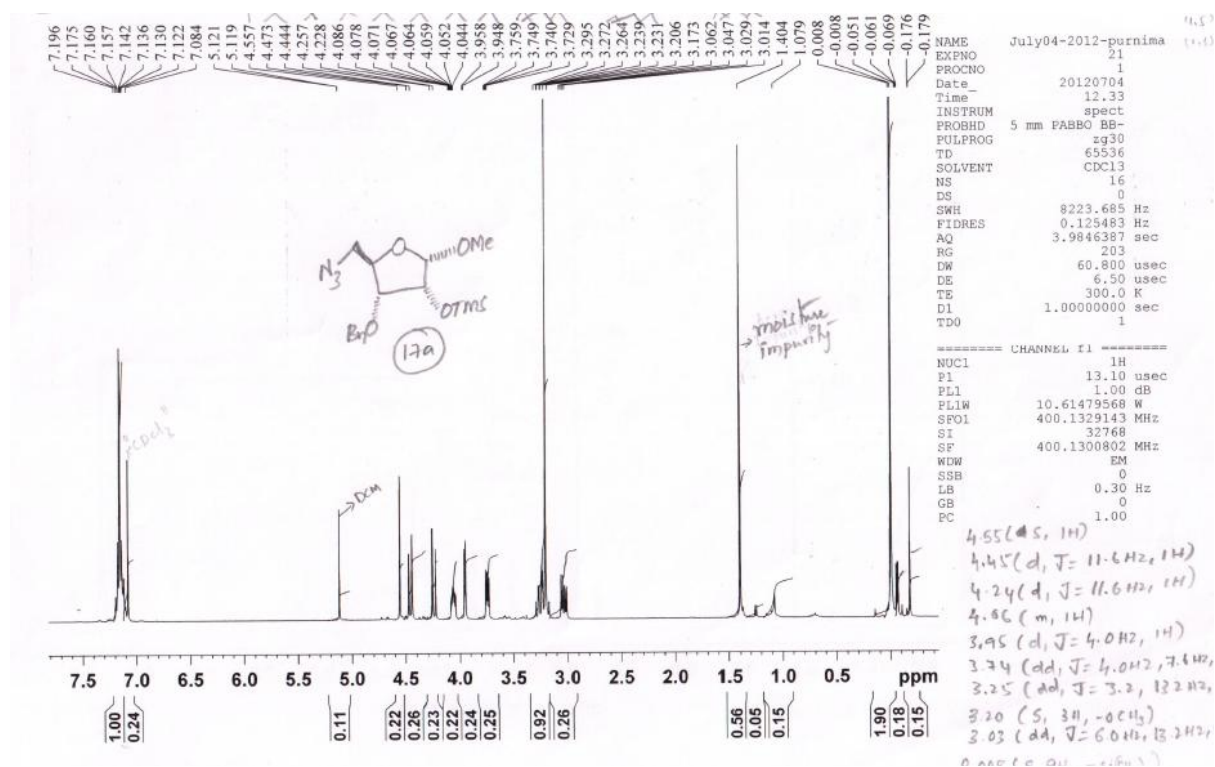

<sup>13</sup>C NMR of compound 17a

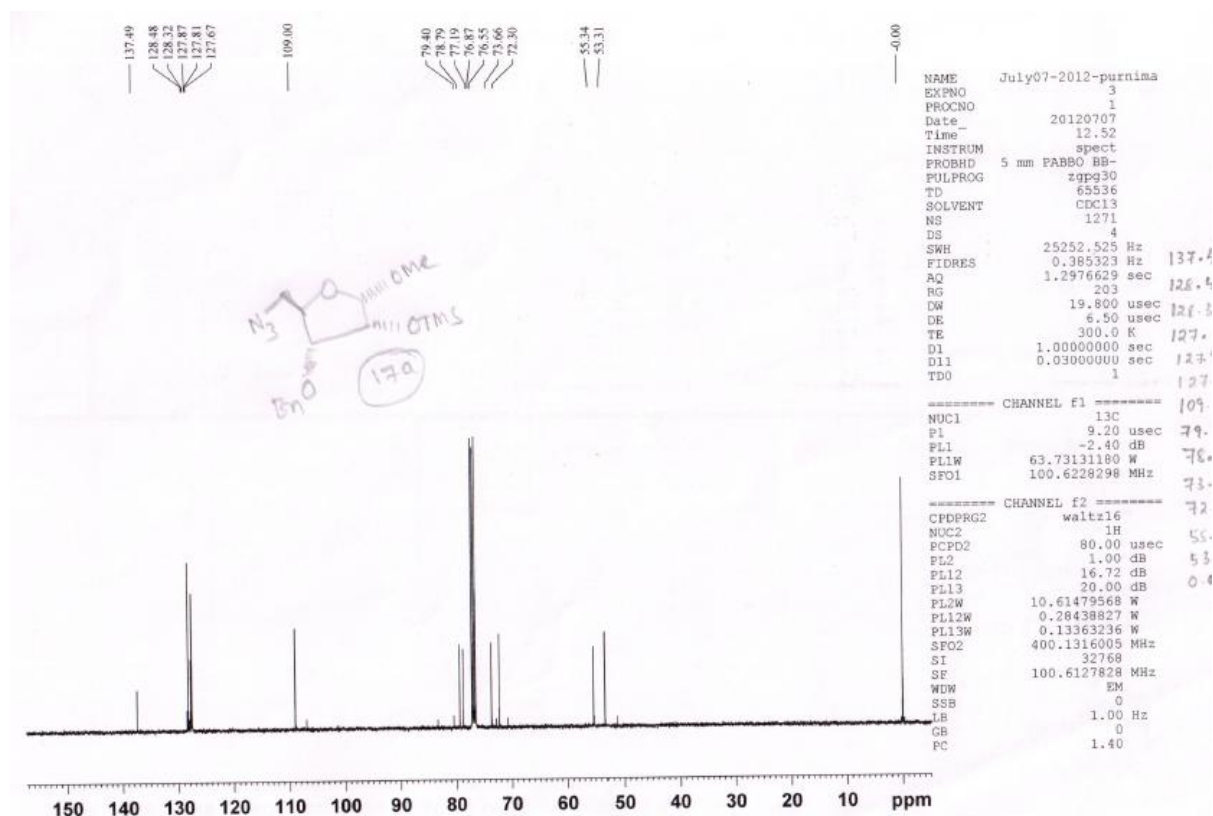

$^1\text{H}$  NMR of compound 18a

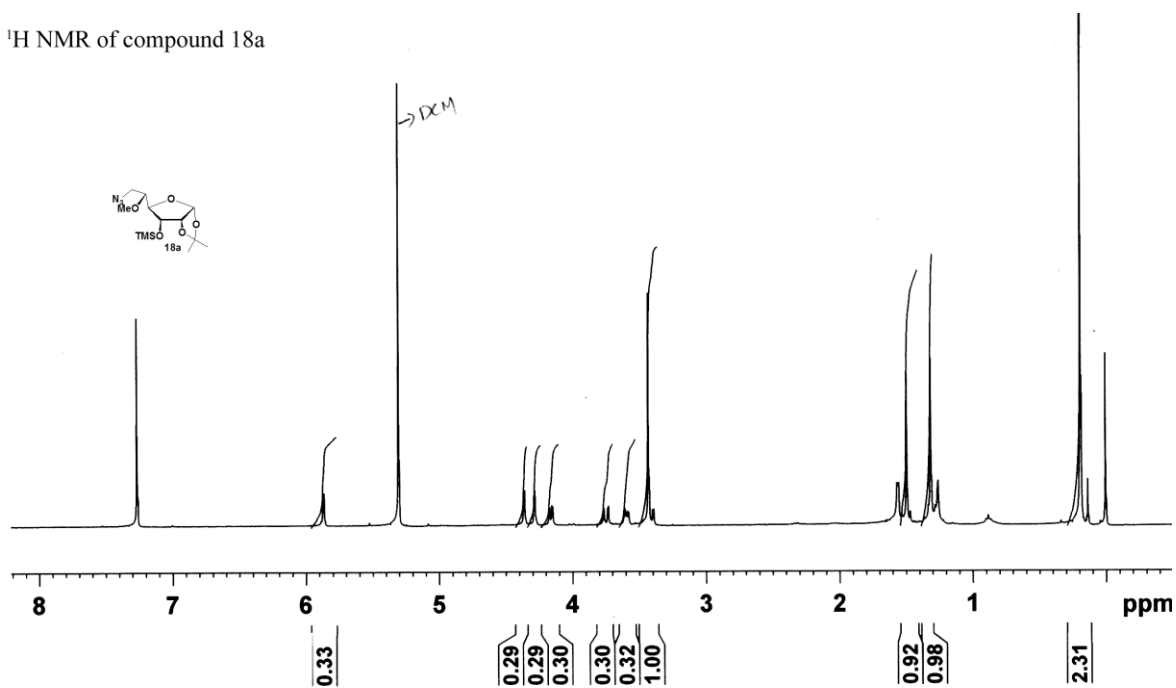

$^{13}\text{C}$  NMR of compound 18a

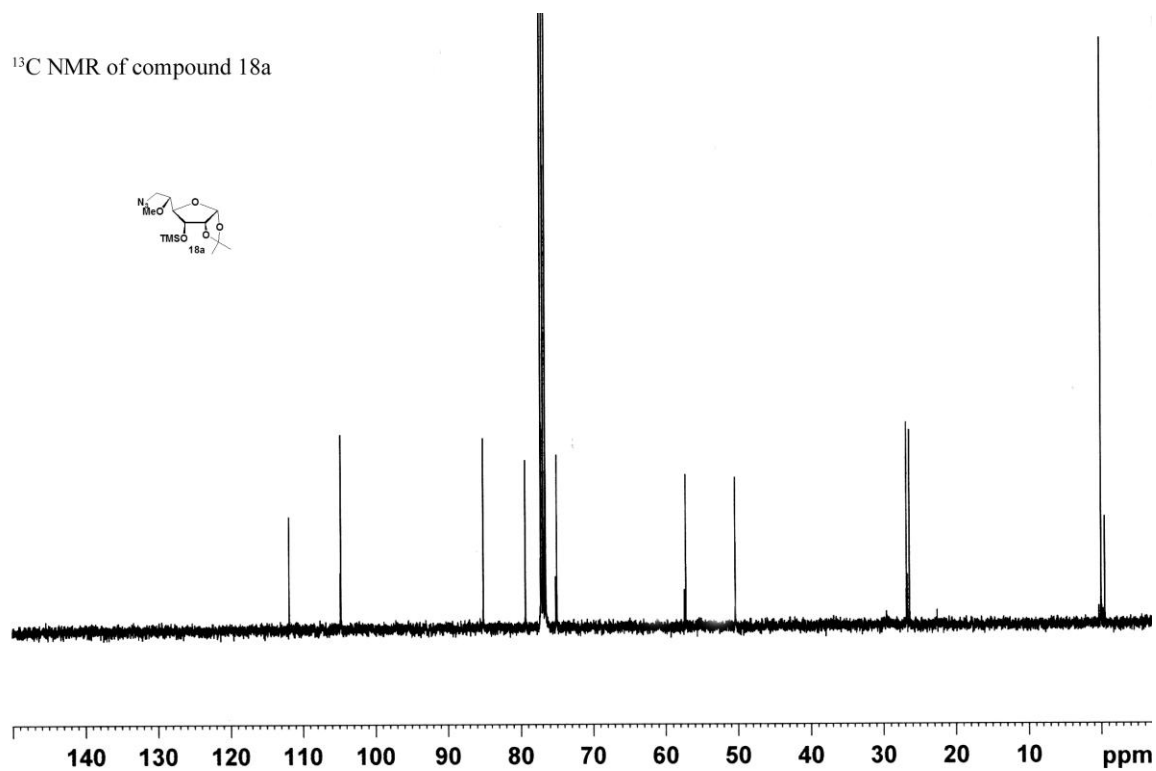

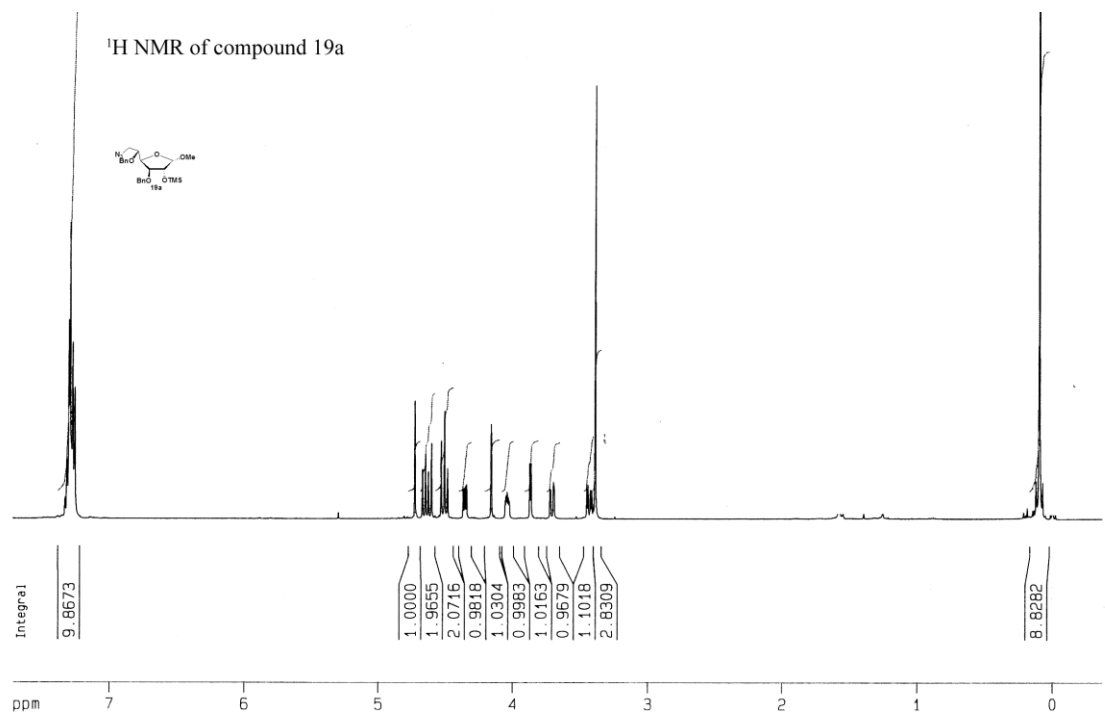

<sup>13</sup>C NMR of compound 19a

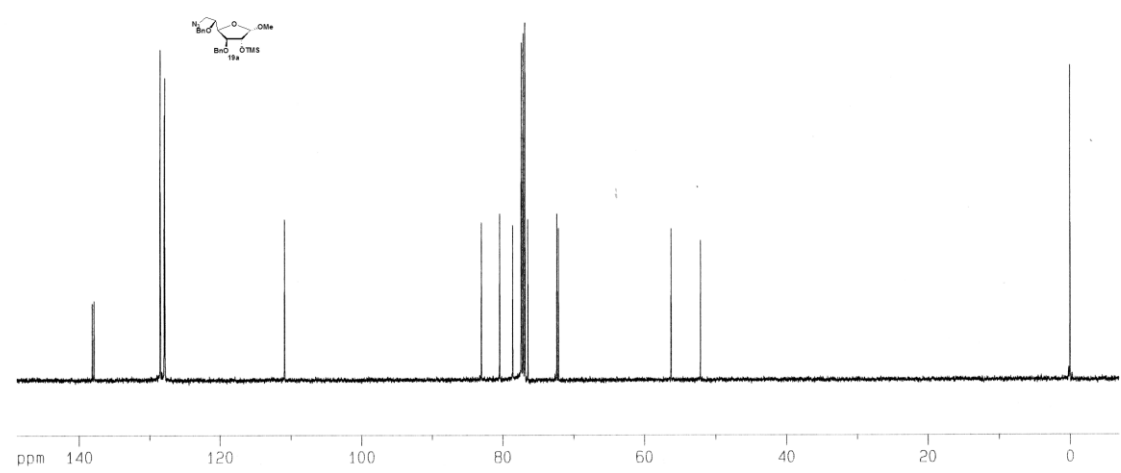

$^1\text{H}$  NMR of compound 21b

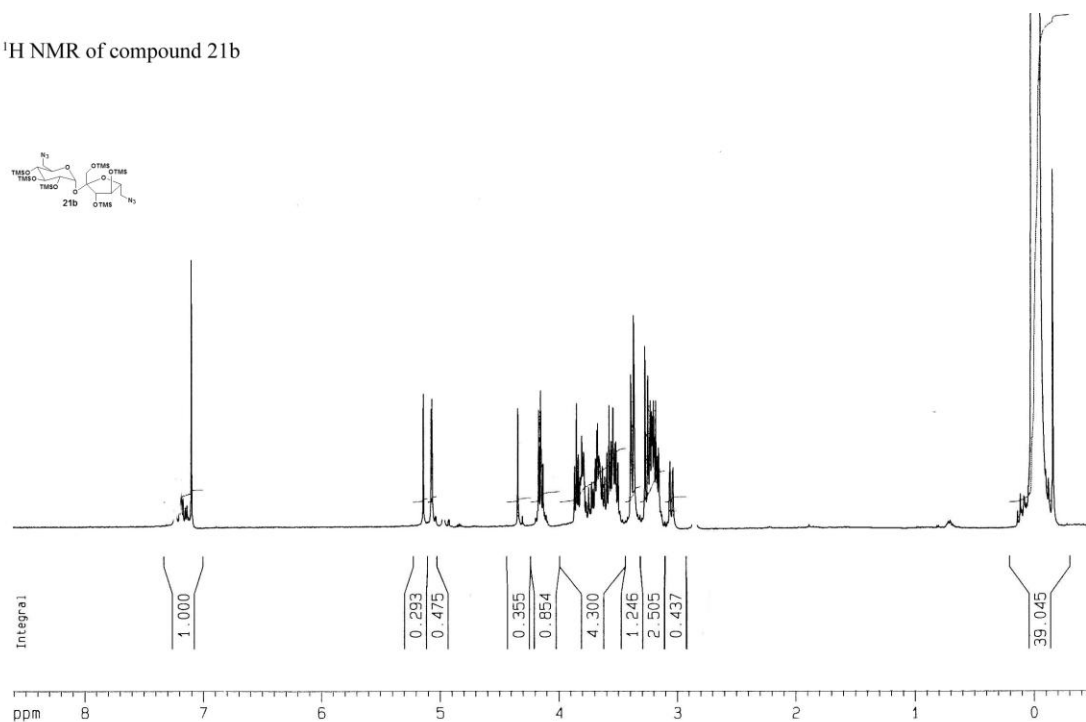

$^{13}\text{C}$  NMR of compound 21b

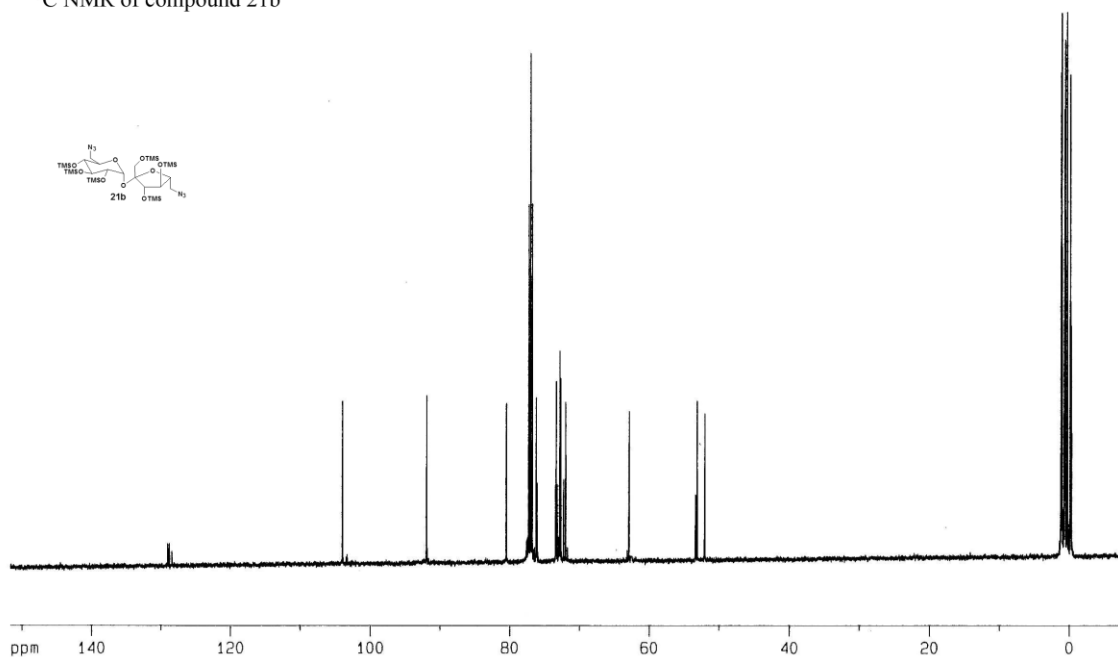

<sup>1</sup>H NMR of compound 22a

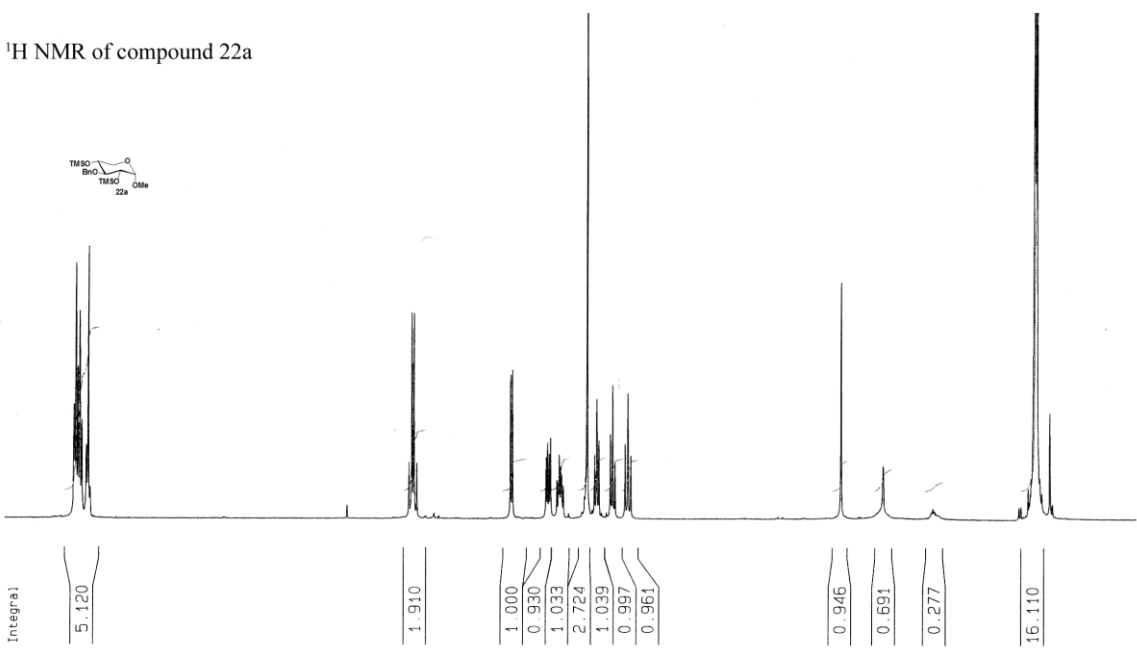

<sup>13</sup>C NMR of compound 22a

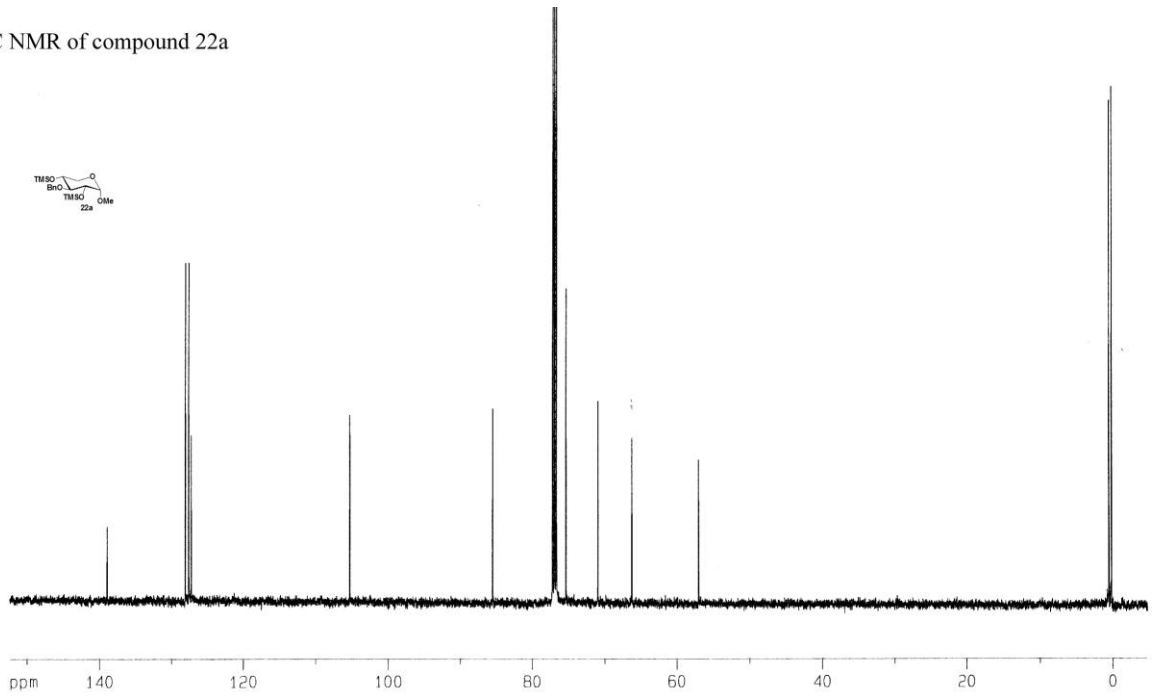

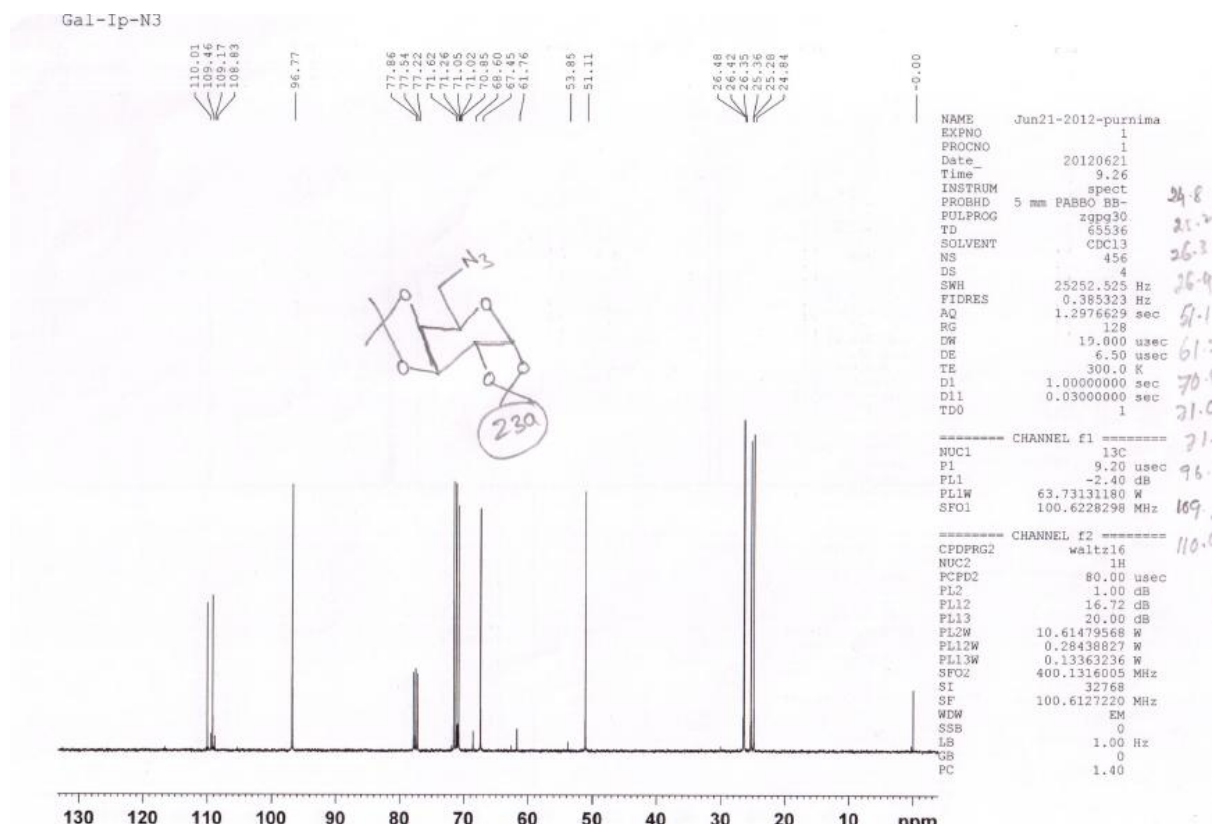

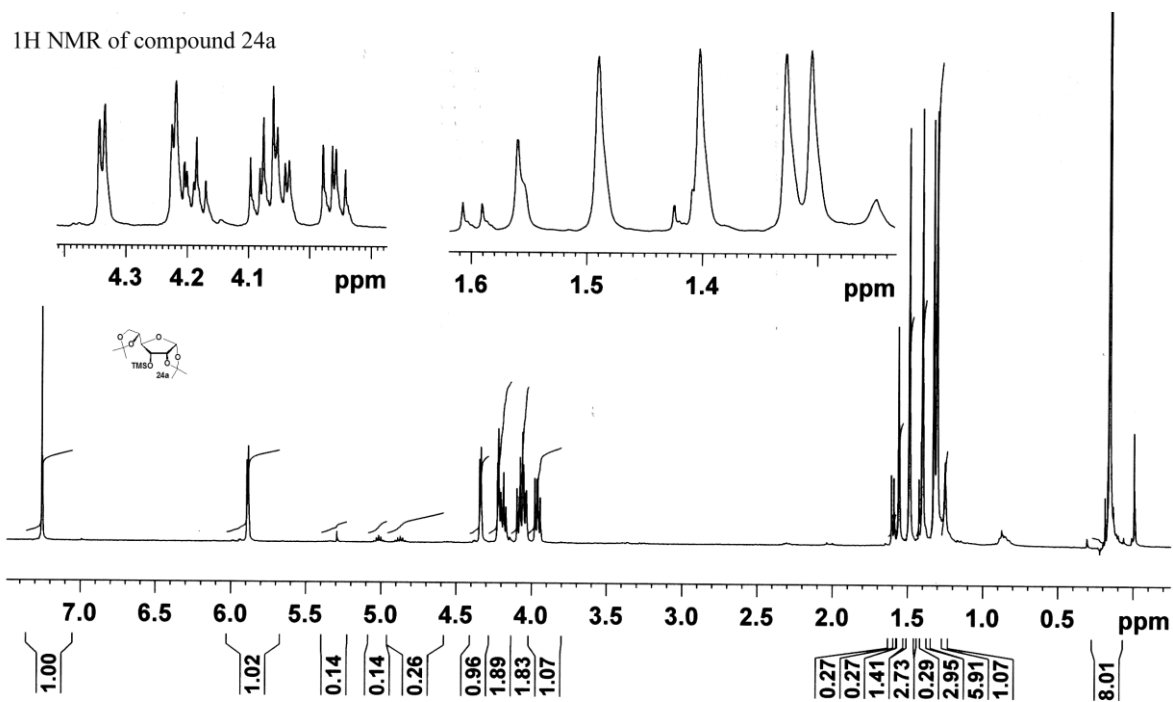

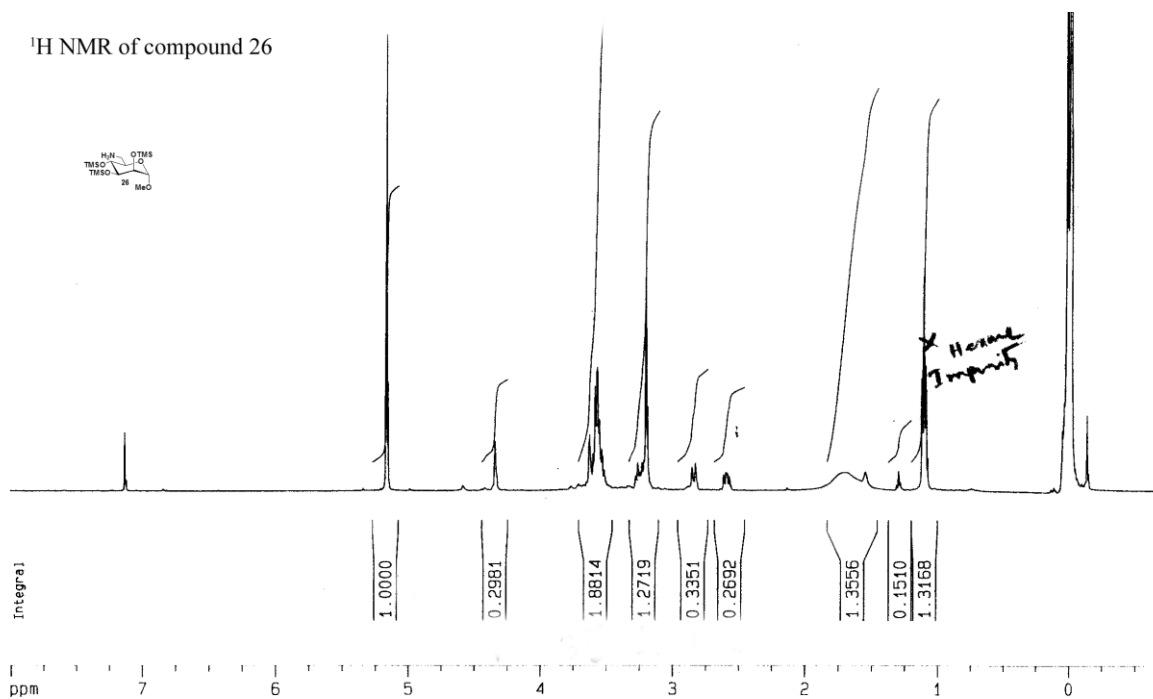

<sup>13</sup>C NMR of compound 26

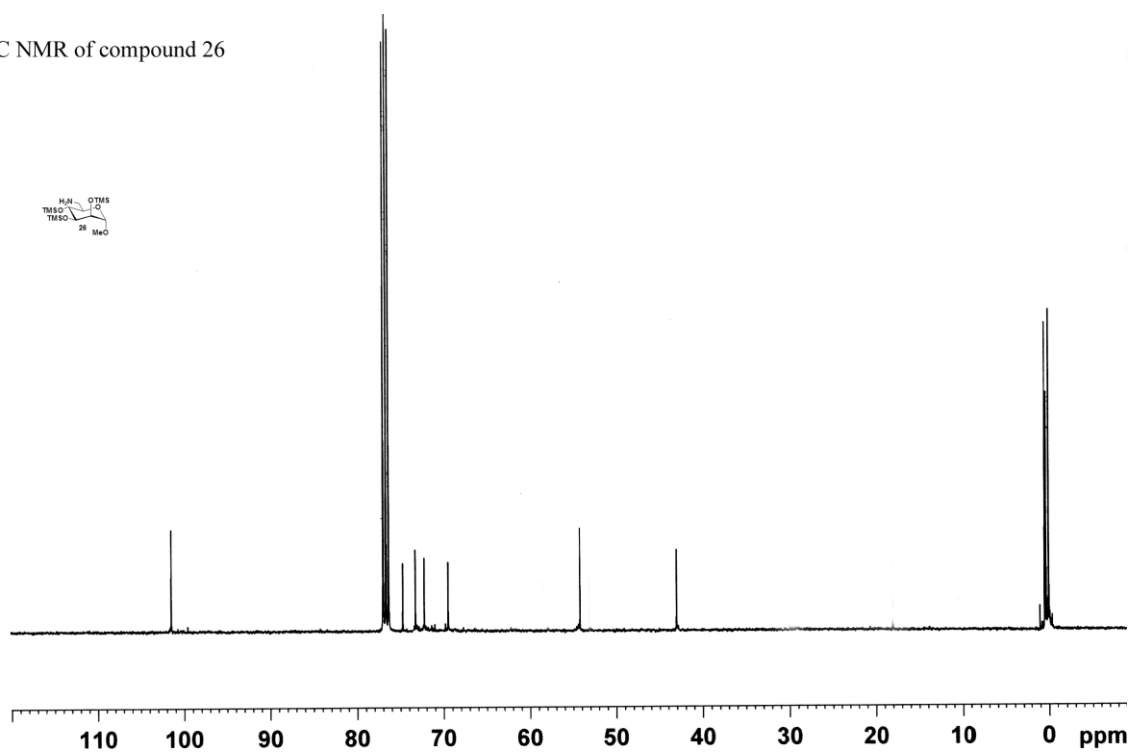

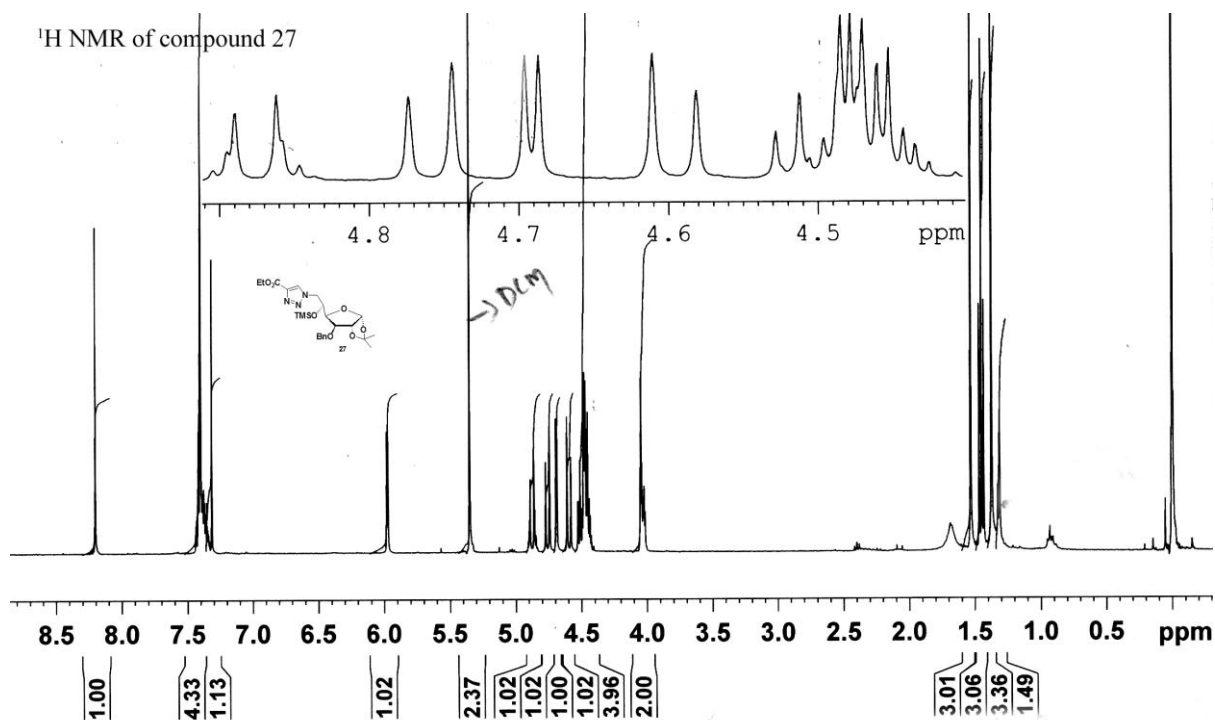

<sup>13</sup>C NMR of compound 27

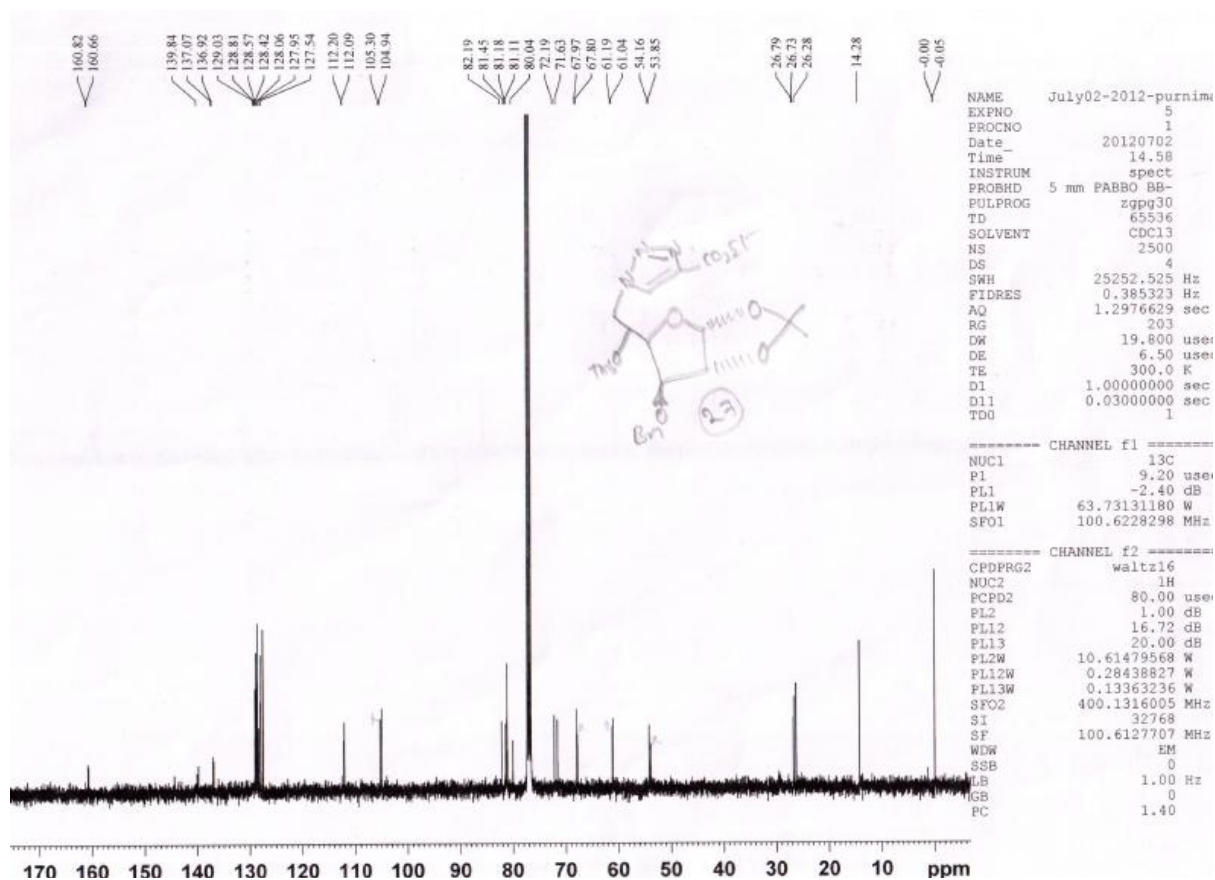

# <sup>1</sup>H NMR of compound 28

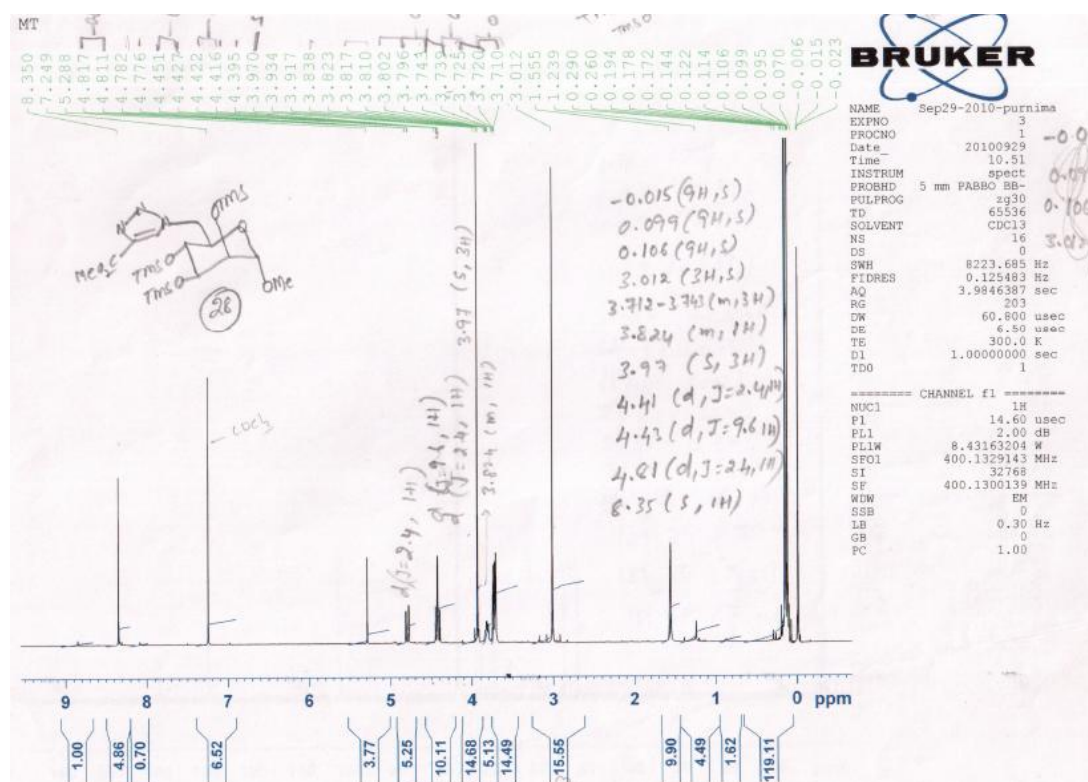

# <sup>13</sup>C NMR of compound 28

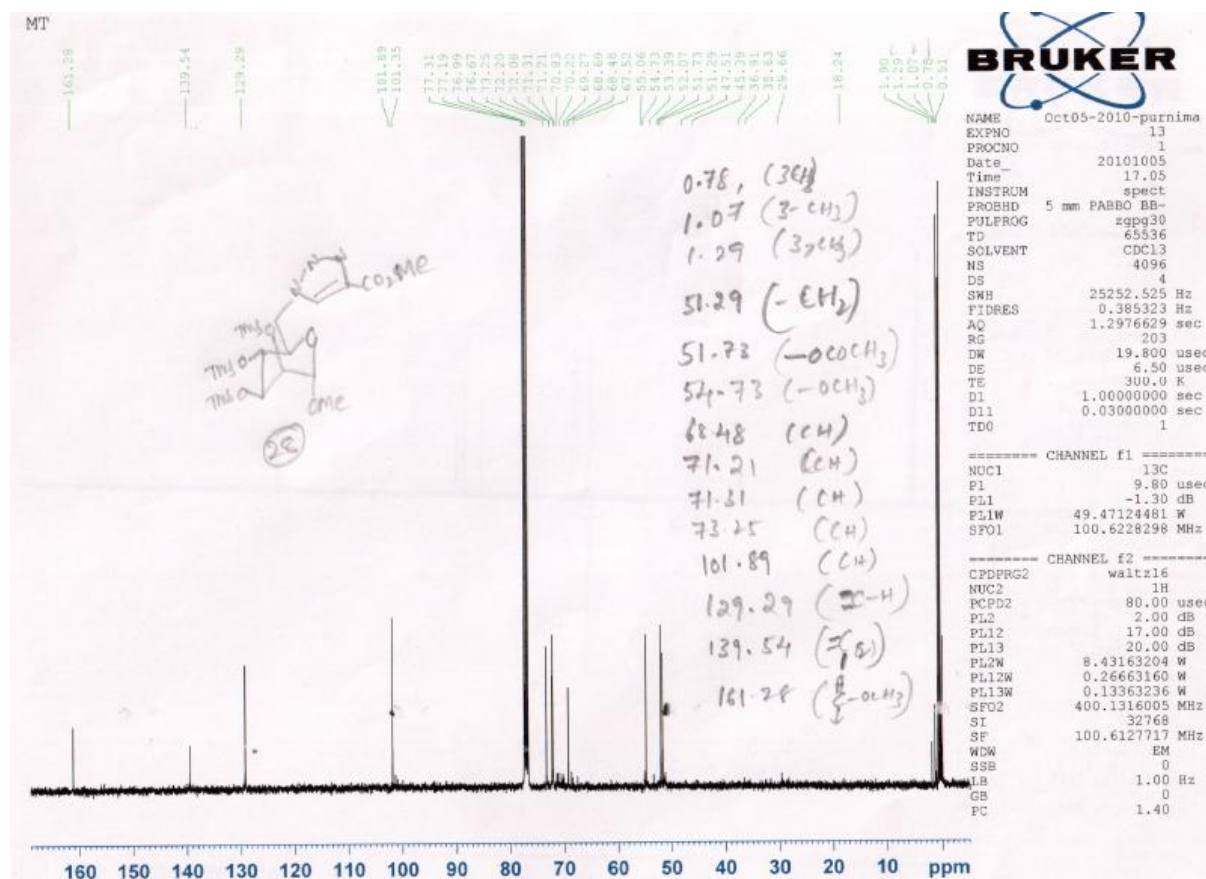

Supplement: c2ob26324f_2.pdf [file c2ob26324f_2.pdf]
